# Supplementary material
Source: Research Square preprint supplement (doi:10.21203/rs.3.rs-10045621/v1)
Supplement: Supplementary file 1 [file c469e1672114909d258e393b.xlsx]

## Sheet: Simulation_v4
ID	latent_group	theta	lz	anomaly_score	mean_rt	cheating_severity	cheater_status	Item_01	Item_02	Item_03	Item_04	Item_05	Item_06	Item_07	Item_08	Item_09	Item_10	Item_11	Item_12	Item_13	Item_14	Item_15	Item_16	Item_17	Item_18	Item_19	Item_20
1	Honest	-0.543867	0.631735	1.66131	11.5269	0	0	1	1	1	1	0	0	1	0	0	0	0	0	0	0	0	0	0	0	0	0
2	Honest	-0.795121	-0.431736	0.266162	12.1294	0	0	1	1	0	0	1	1	1	0	1	0	0	0	0	0	0	0	0	0	0	0
3	Honest	-0.662855	0.558443	0	18.6426	0	0	1	1	1	1	1	1	1	1	1	0	0	1	0	0	0	0	1	0	0	0
4	Honest	2.09596	-0.156057	1.69814	18.5846	0	0	1	1	1	1	1	1	1	1	1	1	1	1	1	1	1	1	1	1	1	1
5	Honest	-0.80473	1.54247	0.229134	10.6587	0	0	1	1	1	1	1	1	0	1	0	1	0	0	0	0	0	0	0	0	0	0
6	Honest	1.84644	-2.35809	0.671222	17.1945	0	0	1	1	1	1	0	1	1	1	1	1	1	1	1	1	1	1	0	0	1	1
7	Honest	1.66573	0.940151	0.498878	9.90792	0	0	1	1	1	1	1	1	1	1	1	1	1	1	1	1	1	0	1	1	1	0
8	Honest	0.0514512	-0.968697	0.952134	14.7304	0	0	1	1	1	0	1	1	1	1	0	0	1	0	0	0	0	0	1	1	0	0
9	Honest	1.3769	1.29501	1.07301	21.6765	0	0	1	1	1	1	1	1	1	1	1	1	1	1	1	1	0	1	0	0	0	0
10	Honest	0.500053	-1.78753	1.11909	21.0241	0	0	1	1	1	1	1	1	1	1	0	1	1	1	0	0	0	0	0	1	0	0
11	Honest	-1.12361	0.152863	1.93574	10.3906	0	0	1	1	1	0	0	0	1	0	0	1	0	0	0	0	0	0	0	0	0	0
12	Honest	1.01866	0.996677	0.699833	10.4957	0	0	1	1	1	1	1	1	0	1	1	1	0	1	0	1	1	0	0	0	0	1
13	Honest	0.698507	1.26235	0.586019	24.4982	0	0	1	1	1	1	0	1	1	0	1	0	1	0	1	1	1	1	0	1	0	0
14	Honest	0.342697	1.4847	0.354236	17.0092	0	0	1	1	1	1	1	1	1	1	1	1	1	0	1	1	1	0	0	0	0	0
15	Honest	0.0959408	-1.41678	0.875572	10.5683	0	0	1	1	1	1	1	1	1	1	1	0	1	1	0	1	1	0	0	0	0	0
16	Honest	-0.662858	-0.789047	0.901307	16.2089	0	0	1	1	1	0	1	1	1	0	1	0	1	0	0	0	1	0	0	1	0	0
17	Honest	-1.03826	0.189511	1.02677	6.14227	0	0	1	1	1	1	0	1	0	0	1	1	0	1	0	0	0	0	0	0	0	0
18	Honest	-0.873989	0.970641	0.20464	18.0977	0	0	0	1	1	0	1	0	0	1	1	0	0	0	0	0	1	0	0	0	0	0
19	Honest	0.505294	2.06536	0.29655	16.2678	0	0	1	1	1	1	0	1	1	1	0	1	1	0	1	1	0	0	0	1	0	0
20	Honest	1.29943	0.00305269	0.310921	15.4632	0	0	1	1	1	1	1	1	1	1	1	1	1	1	1	1	1	1	1	1	0	0
21	Honest	0.150045	0.728019	0.0699706	8.63148	0	0	1	1	1	1	1	1	1	1	1	1	1	1	0	0	0	0	0	1	0	0
22	Honest	0.613274	-0.0485241	0	18.065	0	0	1	1	1	1	1	1	1	1	1	1	1	1	0	0	0	1	1	0	0	0
23	Honest	-0.615653	0.509211	0.172396	10.1007	0	0	1	1	1	0	0	1	0	1	0	1	1	1	0	0	0	0	0	0	0	0
24	Honest	-1.78059	1.53872	0.760491	10.9278	0	0	0	0	1	1	0	1	1	0	0	0	0	1	0	0	0	0	0	0	0	0
25	Honest	0.1907	0.205987	1.69766	4.5522	0	0	1	1	1	1	1	1	1	1	1	1	1	0	1	0	1	0	0	0	0	0
26	Honest	0.452252	0.503385	0.840649	17.9121	0	0	1	1	1	1	1	1	1	1	0	0	1	0	1	1	0	1	0	1	0	0
27	Honest	0.79949	0.302168	0	13.7804	0	0	1	1	1	1	0	1	1	1	0	1	1	1	1	1	1	1	1	1	0	0
28	Honest	-0.617083	-0.441439	0.769957	7.23512	0	0	1	1	1	1	1	1	1	0	1	1	1	0	0	0	0	0	0	0	0	0
29	Honest	-0.56603	0.722558	0.618854	9.11196	0	0	1	1	1	0	0	0	0	1	0	0	0	0	0	1	0	0	1	0	0	0
30	Honest	-0.379717	0.248006	0.660445	10.7898	0	0	1	1	1	1	0	1	1	1	1	0	1	0	0	0	0	0	0	0	0	0
31	Honest	-2.03575	0.381787	0.566665	9.50804	0	0	0	0	0	1	1	0	1	0	0	1	0	0	0	0	0	0	0	0	0	0
32	Honest	-0.932992	-1.43079	1.74619	13.2928	0	0	0	1	1	1	1	0	0	0	1	0	0	0	0	0	0	0	0	0	0	0
33	Honest	-1.50581	-1.42255	0.971506	5.53536	0	0	0	0	1	0	1	0	0	0	1	0	0	0	0	0	0	0	0	0	0	0
34	Honest	1.77045	-1.33974	0.421198	12.3583	0	0	1	1	1	1	1	1	0	1	1	0	1	1	1	1	1	1	1	0	1	1
35	Honest	0.968858	-0.699374	0.917802	16.9404	0	0	1	1	1	1	1	1	1	1	0	1	1	0	1	1	0	1	1	1	0	0
36	Honest	2.05143	-0.0920014	0.104328	13.3935	0	0	1	1	1	1	1	1	1	1	0	1	1	1	1	1	1	1	1	1	1	0
37	Honest	0.674029	-1.04242	1.38297	14.0485	0	0	1	1	1	0	1	1	1	1	1	1	1	0	1	1	0	0	0	0	0	0
38	Honest	0.192265	0.485885	0.475582	18.116	0	0	1	1	1	1	0	1	1	1	1	1	1	1	0	1	1	1	1	0	0	0
39	Honest	0.339171	0.729812	0.448209	18.1206	0	0	1	1	1	1	1	1	1	0	0	1	1	0	1	0	1	0	1	0	1	0
40	Honest	0.964432	-1.26913	0.492067	12.9316	0	0	1	1	1	1	1	1	1	1	1	1	1	1	0	1	0	0	1	1	0	0
41	Honest	-1.34395	-0.598996	0.621883	8.59646	0	0	1	1	0	0	0	1	0	0	1	0	0	0	0	0	0	0	0	0	0	0
42	Honest	1.05492	-0.629547	0.943383	4.9472	0	0	1	1	1	1	1	1	1	1	0	1	1	1	0	0	0	1	0	0	0	0
43	Honest	0.767905	-0.414231	0.241964	13.2256	0	0	1	1	1	1	1	1	1	1	0	1	1	1	1	1	0	1	1	0	0	0
44	Honest	-0.0459721	-0.0299758	0.88924	7.75608	0	0	1	1	1	1	1	1	1	0	1	0	0	0	0	1	1	0	0	0	0	0
45	Honest	1.90585	-1.16555	1.5697	3.9293	0	0	1	1	1	1	1	1	1	1	1	1	1	1	1	1	0	1	1	0	0	1
46	Honest	-1.10058	-0.179604	0.263725	17.9005	0	0	1	1	1	0	0	1	0	1	1	0	0	0	0	0	0	0	0	1	0	0
47	Honest	0.729618	-0.914938	2.4856	19.5474	0	0	1	0	1	0	1	1	1	1	1	1	1	0	1	1	0	0	1	0	0	0
48	Honest	-0.519077	0.110508	0.78084	9.08466	0	0	1	1	1	0	1	1	1	1	1	0	0	0	0	1	0	0	0	0	0	0
49	Honest	0.028035	0.104729	0.96246	13.8184	0	0	1	1	1	0	0	1	1	1	1	0	0	0	0	0	0	0	0	1	0	0
50	Honest	-0.550654	-1.18412	1.03575	13.3733	0	0	1	1	1	1	0	0	1	1	0	0	0	1	0	0	0	0	0	0	0	0
51	Honest	-1.93989	-1.58525	1.174	9.36766	0	0	1	0	0	0	1	1	0	0	1	0	0	0	0	0	0	0	0	0	0	0
52	Honest	-2.01154	0.131219	1.02799	6.85926	0	0	0	0	0	0	1	1	0	0	0	0	0	0	0	0	0	0	0	0	0	0
53	Honest	0.373617	0.00773033	1.47105	8.90006	0	0	1	1	1	1	1	1	1	1	0	0	1	0	1	0	1	1	0	0	1	0
54	Honest	-0.459488	-1.16653	0.280402	17.5831	0	0	1	1	1	1	1	1	1	0	0	1	0	0	0	0	0	0	0	0	0	0
55	Honest	2.02054	1.34884	1.26877	16.0283	0	0	1	1	1	1	1	1	0	1	1	1	1	1	1	1	1	1	1	0	1	0
56	Honest	-0.180451	0.47561	1.46874	0.5	0	0	1	1	1	0	0	1	0	1	0	1	0	0	0	0	0	0	0	0	0	0
57	Honest	0.529218	-1.29309	1.61116	16.4239	0	0	1	0	1	1	1	1	0	0	0	0	1	0	1	1	0	0	0	0	0	0
58	Honest	0.990538	1.04443	0.16626	7.54765	0	0	1	1	1	0	1	1	1	1	1	1	1	0	1	1	0	0	1	0	0	1
59	Honest	-0.067788	-0.311502	0	13.2458	0	0	1	0	1	1	1	1	1	0	1	0	1	1	1	1	0	0	0	0	0	0
60	Honest	0.228428	2.31757	0	6.89208	0	0	1	1	1	1	0	1	1	1	0	1	1	0	1	0	1	0	1	0	0	0
61	Honest	1.40913	-1.37988	1.07882	13.9903	0	0	1	1	1	1	1	1	1	1	1	1	1	0	1	1	1	0	0	0	0	0
62	Honest	0.74813	1.27569	0.263124	7.23398	0	0	1	1	1	1	1	1	1	1	0	1	1	1	1	0	0	1	0	0	0	0
63	Honest	1.3686	0.714514	0.658234	7.81317	0	0	1	1	1	0	1	0	1	1	1	1	1	1	0	1	1	1	1	1	0	0
64	Honest	-0.428513	-1.48746	0.638561	10.5776	0	0	1	1	0	1	0	0	0	1	1	0	0	1	0	0	0	0	0	0	0	0
65	Honest	0.314227	-0.976295	0.915401	10.9555	0	0	1	1	1	1	1	1	1	1	0	0	1	0	0	0	0	1	0	0	0	0
66	Honest	-0.816914	0.789277	0	14.2484	0	0	1	0	1	1	1	0	0	0	0	0	0	0	0	0	0	0	1	0	0	0
67	Honest	0.89057	1.09843	0.515517	15.299	0	0	1	1	1	1	1	1	0	1	0	1	1	1	0	1	1	0	0	1	0	0
68	Honest	-0.877384	-1.01795	1.85476	10.0502	0	0	1	1	0	0	0	0	0	1	0	1	0	0	1	0	0	0	0	0	0	0
69	Honest	-1.08286	0.673099	0	13.2961	0	0	1	0	1	0	1	0	1	0	0	1	0	0	0	0	0	0	0	0	0	0
70	Honest	0.86935	-0.666182	0.630076	16.3296	0	0	1	1	1	1	0	1	1	1	0	1	1	1	0	1	1	0	1	0	0	0
71	Honest	-0.407469	-0.522815	0	2.80946	0	0	1	0	1	1	0	1	1	1	1	0	0	1	0	1	0	0	0	1	0	0
72	Honest	-0.895649	-0.204189	0.120776	10.9761	0	0	1	1	1	0	1	0	0	1	1	0	0	0	0	0	0	0	1	0	0	0
73	Honest	0.686262	-0.745175	0.658715	6.25123	0	0	1	0	1	1	1	1	0	1	1	1	0	1	0	1	0	0	0	0	1	0
74	Honest	-0.0955805	-0.383466	1.63663	13.163	0	0	1	1	1	1	1	1	0	1	1	0	1	0	0	0	0	0	0	0	0	0
75	Honest	-1.75124	0.496456	0.947446	14.5499	0	0	0	0	0	1	0	0	1	0	0	0	0	0	0	0	0	0	1	0	0	0
76	Honest	1.05352	-0.997676	0.461772	8.93271	0	0	1	1	1	1	1	1	1	1	1	1	1	1	1	1	1	1	1	0	0	0
77	Honest	-0.631015	-1.22891	0.876989	13.3249	0	0	1	1	1	1	1	1	1	0	0	0	0	0	0	0	0	0	0	0	0	0
78	Honest	-2.81542	-1.98454	1.62295	10.2236	0	0	0	1	0	0	1	0	0	0	0	0	0	0	0	0	0	0	0	0	0	0
79	Honest	-1.81149	0.123831	1.18896	18.5685	0	0	1	0	0	0	1	0	1	0	0	0	0	0	0	0	0	0	0	0	0	0
80	Honest	1.22083	0.600604	0.679436	9.16033	0	0	1	1	1	1	1	0	1	1	0	1	1	1	1	0	1	1	1	0	0	0
81	Honest	0.33368	1.6349	0.42427	17.4395	0	0	1	0	1	1	1	0	0	1	1	0	1	1	1	0	0	0	0	0	0	0
82	Honest	0.0411492	-2.14368	0.94921	16.6276	0	0	1	1	1	0	1	1	1	1	1	0	0	1	0	0	0	0	0	0	1	0
83	Honest	-1.56225	-0.445857	0.837192	12.7184	0	0	1	1	0	1	1	1	0	0	0	0	0	0	0	0	0	0	0	1	0	0
84	Honest	0.0028422	-0.590204	1.33003	14.0269	0	0	1	1	1	1	1	1	1	0	0	1	1	1	0	0	0	0	1	1	0	0
85	Honest	0.422594	1.48375	0.879141	18.6239	0	0	1	0	1	1	1	0	1	1	1	0	0	1	0	0	0	0	0	1	0	0
86	Honest	-0.00449105	0.23807	1.65534	10.6311	0	0	1	1	1	0	1	1	1	1	0	0	1	0	0	0	0	0	0	0	0	0
87	Honest	-0.942694	-1.08355	1.69873	9.83859	0	0	1	0	1	0	1	1	0	0	0	0	0	0	0	0	0	0	0	0	0	0
88	Honest	-1.43661	-0.914402	1.00386	8.52758	0	0	1	1	0	0	0	0	0	0	0	0	0	0	0	0	0	0	0	0	0	0
89	Honest	0.578878	0.121914	0.906642	12.0299	0	0	1	1	1	1	0	0	1	1	1	1	0	1	0	0	0	0	0	0	0	0
90	Honest	-0.908247	-0.219631	1.18261	13.9295	0	0	1	1	1	0	1	0	0	0	1	1	0	0	0	0	0	0	0	0	0	0
91	Honest	0.106348	-1.31217	0.923991	9.8555	0	0	1	1	1	0	1	1	1	1	1	1	1	1	0	0	1	0	1	1	0	0
92	Honest	-1.25749	-0.368045	0.948721	14.6598	0	0	1	1	1	1	1	0	1	0	0	1	0	0	0	0	0	0	0	0	0	0
93	Honest	2.51395	1.35685	0.551791	17.7433	0	0	1	1	1	1	1	1	1	1	1	1	1	1	1	1	1	1	1	0	0	1
94	Honest	-0.497985	0.409704	1.0476	7.77399	0	0	1	1	1	1	0	1	1	0	0	0	1	0	0	0	0	0	0	0	0	0
95	Honest	0.207355	0.736701	0.351845	12.6468	0	0	1	1	1	0	1	0	1	1	0	1	0	1	0	0	0	0	0	0	0	0
96	Honest	-0.572755	0.569104	0.649955	18.5577	0	0	0	1	1	1	1	0	0	0	1	0	0	0	1	0	0	0	0	0	0	0
97	Honest	1.02714	0.936734	0.864836	10.3459	0	0	1	1	1	1	1	1	1	1	1	1	1	0	1	1	1	0	1	0	0	0
98	Honest	-0.251965	-0.28124	0.430647	9.78713	0	0	1	0	1	0	0	1	0	0	1	1	0	0	0	0	0	0	1	0	0	0
99	Honest	-0.457551	-0.507871	1.03903	12.7674	0	0	1	0	1	1	1	0	1	0	1	0	0	0	0	0	0	0	0	0	0	0
100	Honest	0.461183	-0.61388	1.01673	6.03507	0	0	1	0	1	1	0	1	0	1	1	1	1	1	0	0	0	0	0	1	0	0
101	Honest	-0.869456	-1.05004	0.751238	14.9171	0	0	1	1	0	0	0	1	1	1	1	1	0	0	1	0	0	0	1	0	0	0
102	Honest	-0.924328	-0.967911	0.832454	8.4679	0	0	1	1	1	1	0	1	1	0	1	0	0	0	0	0	0	0	0	0	0	0
103	Honest	-1.68898	-0.834356	0.785371	11.8308	0	0	1	1	1	0	1	0	0	0	1	0	0	0	0	0	0	0	0	0	0	0
104	Honest	0.642945	-0.0458978	0.612026	14.9149	0	0	1	1	1	1	1	1	0	1	1	1	1	1	1	1	1	0	0	1	0	0
105	Honest	0.669389	1.47053	0.424904	15.219	0	0	1	0	1	1	1	1	1	0	1	1	0	1	0	1	1	0	0	0	0	0
106	Honest	1.02323	-0.704696	0.406703	13.0169	0	0	1	1	1	1	1	0	1	1	1	1	1	1	0	1	0	1	0	0	0	0
107	Honest	-3.014	-0.396556	0.917789	12.686	0	0	0	0	0	0	0	0	0	0	0	0	0	0	0	0	0	0	0	0	0	0
108	Honest	-1.12774	-0.335752	0.850179	16.0107	0	0	1	1	0	1	0	0	0	0	1	0	0	0	0	0	0	0	0	0	0	0
109	Honest	-0.885712	1.35446	1.27269	2.35454	0	0	1	0	1	0	1	1	0	0	0	1	0	0	0	1	0	0	0	0	0	0
110	Honest	-1.16268	-0.501122	0.642915	12.3816	0	0	1	1	1	1	0	0	0	0	1	0	0	0	0	0	0	0	0	0	0	0
111	Honest	2.04896	0.61469	0.104285	13.2325	0	0	1	1	1	1	1	1	1	1	1	1	1	1	1	1	1	1	1	1	1	0
112	Honest	-1.94063	0.707599	0.575806	21.8187	0	0	0	0	0	0	0	0	1	0	0	0	0	0	0	0	0	0	0	0	1	0
113	Honest	-1.7344	-1.2706	1.22355	5.80525	0	0	1	0	0	1	1	0	0	0	0	0	0	0	1	0	0	0	0	0	0	0
114	Honest	0.831086	-0.0964961	0	15.4517	0	0	1	1	1	1	1	1	1	1	1	1	1	1	1	0	0	0	1	0	0	0
115	Honest	0.575521	0.669586	0.506792	12.7658	0	0	1	1	1	1	1	1	1	1	0	1	0	0	1	1	0	1	0	0	0	0
116	Honest	-0.474582	-0.120579	0.561031	13.1151	0	0	1	1	1	0	0	1	1	1	0	0	1	1	0	0	0	0	0	0	0	0
117	Honest	0.946268	1.12773	0.680882	23.1625	0	0	1	0	1	1	1	1	1	1	1	1	1	1	1	1	1	1	0	0	0	0
118	Honest	1.24603	0.331751	0.894697	7.03922	0	0	1	1	1	1	1	1	1	1	1	1	1	1	1	0	1	1	1	0	0	1
119	Honest	0.246281	2.09376	0	9.38116	0	0	1	1	1	1	0	1	0	0	0	1	1	1	0	0	0	0	0	1	1	0
120	Honest	-0.93999	1.04053	1.39165	0.5	0	0	1	1	0	0	0	0	0	0	0	0	1	0	0	0	1	0	0	0	0	0
121	Honest	1.19109	1.85963	0.426743	14.3875	0	0	1	1	1	1	1	1	1	1	1	1	1	0	1	0	0	1	1	0	0	0
122	Honest	-1.79844	-1.09645	1.29669	14.5202	0	0	0	0	1	0	1	0	0	0	0	0	0	0	0	0	0	0	0	0	0	0
123	Honest	-0.0423153	0.151336	0.753392	8.80408	0	0	1	1	1	1	1	0	0	1	0	1	1	0	0	0	0	0	0	0	0	0
124	Honest	-0.443723	-0.955757	1.69923	10.2992	0	0	1	0	1	1	0	0	0	0	0	0	1	0	0	0	0	0	0	0	0	0
125	Honest	-0.163054	-0.195471	0.790863	12.5616	0	0	1	1	1	1	1	1	0	1	0	0	0	0	1	0	0	0	0	0	0	0
126	Honest	-0.0992547	0.477922	0.64609	11.2562	0	0	1	0	1	1	1	0	1	1	1	0	1	0	0	1	0	0	0	0	0	0
127	Honest	0.0641222	-0.143665	1.67446	19.1729	0	0	1	1	1	1	0	0	1	1	1	0	1	0	0	0	0	0	1	0	0	0
128	Honest	1.31659	0.0485071	1.66631	14.1966	0	0	1	1	1	1	1	1	1	0	1	1	1	1	1	0	1	0	1	1	0	1
129	Honest	0.486397	0.344127	0.946939	18.4087	0	0	1	0	1	1	1	0	0	0	1	0	1	0	0	0	1	1	1	1	1	0
130	Honest	-0.736696	-0.0929687	0.566019	14.5579	0	0	0	1	1	0	0	0	1	1	0	0	0	0	0	0	0	0	0	0	0	0
131	Honest	-0.245862	-0.0338886	0.930158	12.6039	0	0	1	1	1	1	0	0	1	0	1	1	0	0	0	0	0	0	0	1	0	0
132	Honest	0.421686	-1.18781	1.6327	16.558	0	0	1	0	1	0	1	1	0	0	1	1	1	1	0	0	0	1	0	0	0	0
133	Honest	0.750258	1.64868	1.03876	9.88858	0	0	0	1	1	1	1	1	1	1	1	1	1	0	0	0	0	0	0	0	0	0
134	Honest	0.930906	0.456411	0.780477	12.6017	0	0	1	1	1	0	0	1	1	1	1	0	1	0	1	1	1	0	1	0	0	0
135	Honest	-0.104453	-0.612519	0.989387	12.5586	0	0	1	1	1	1	0	0	1	1	1	1	1	1	0	0	1	0	0	0	0	0
136	Honest	-1.14249	0.0303648	0	18.8437	0	0	1	1	1	1	1	0	1	1	1	0	0	0	0	0	0	0	0	0	0	0
137	Honest	1.0984	1.25106	0	15.9439	0	0	1	1	1	1	1	1	0	1	1	1	1	1	1	0	1	0	0	1	0	0
138	Honest	0.396092	1.20036	0.261513	11.0072	0	0	1	0	1	0	1	1	1	1	1	1	1	0	0	0	0	0	0	0	0	0
139	Honest	0.99519	-1.32103	1.02536	10.906	0	0	1	1	1	1	1	1	0	1	0	1	1	1	1	1	0	0	0	1	0	0
140	Honest	-0.885772	-0.0348975	0.62537	12.0273	0	0	1	0	1	1	1	1	0	0	1	1	0	0	0	0	1	0	0	0	0	0
141	Honest	0.393033	-1.4313	0.495411	13.1442	0	0	1	1	1	1	1	1	0	1	0	1	1	0	0	0	0	1	0	0	0	0
142	Honest	-2.44314	-0.33479	0	11.5018	0	0	0	0	1	1	0	0	1	0	0	0	0	0	0	0	0	0	0	0	0	0
143	Honest	1.22037	1.47099	1.22111	12.2069	0	0	1	1	1	1	1	1	1	1	1	0	1	0	1	1	1	0	0	1	0	0
144	Honest	0.0500244	-1.16564	2.11017	14.815	0	0	1	1	1	0	1	1	0	1	1	0	0	0	1	0	0	0	0	0	0	0
145	Honest	-1.08826	-0.517754	1.66556	5.87455	0	0	1	0	1	1	1	0	0	0	1	0	0	0	0	0	0	0	0	0	0	0
146	Honest	0.0836061	2.52159	1.01407	9.8498	0	0	1	1	1	0	1	1	1	1	1	1	1	0	0	0	0	0	0	0	0	0
147	Honest	1.74579	-1.44309	1.39287	13.9881	0	0	1	1	1	1	1	1	1	1	1	1	1	1	1	1	1	1	1	1	1	1
148	Honest	0.0249302	0.606528	0.55114	14.0776	0	0	1	1	1	1	1	1	1	0	0	1	1	0	1	0	0	0	0	0	0	0
149	Honest	0.449551	0.504749	0.375831	14.957	0	0	1	1	1	1	1	1	1	1	1	1	1	0	0	1	1	1	0	0	0	0
150	Honest	0.212154	0.180735	1.66168	16.135	0	0	1	1	1	1	1	1	1	1	1	1	1	0	0	1	0	1	0	0	0	0
151	Honest	-0.25158	-1.52384	1.09372	9.66302	0	0	1	0	1	1	1	1	1	1	1	1	0	1	1	0	0	0	0	0	1	0
152	Honest	-0.262771	0.498287	0.686866	16.9376	0	0	1	1	1	0	1	1	0	0	1	0	1	0	0	0	0	0	0	0	0	0
153	Honest	0.146345	0.564024	0	17.2227	0	0	1	1	1	1	1	1	0	0	1	0	0	1	1	0	0	0	0	0	0	0
154	Honest	-0.71118	-0.373173	0.882226	14.1973	0	0	1	1	1	1	1	1	1	0	0	0	0	1	0	0	0	0	0	0	0	0
155	Honest	0.586152	-0.238765	1.56059	10.1069	0	0	1	1	1	1	1	1	0	0	1	1	0	1	0	0	1	0	0	0	1	0
156	Honest	-1.54805	-0.395474	0.703789	11.9357	0	0	1	1	0	0	0	0	0	1	0	0	0	0	1	0	0	0	0	0	0	0
157	Honest	0.759316	-0.249239	1.04498	9.24635	0	0	1	1	1	1	0	1	1	1	1	1	1	0	1	1	1	1	1	1	0	0
158	Honest	1.09104	-0.218626	1.01859	14.8478	0	0	1	1	1	1	1	0	0	1	1	1	1	1	0	1	0	1	0	0	0	0
159	Honest	-0.851827	1.04247	0.749452	14.0259	0	0	1	1	1	0	0	1	1	1	0	0	0	0	0	0	0	0	1	0	0	0
160	Honest	-0.104566	0.58424	0	16.7689	0	0	1	1	1	1	1	0	1	0	0	1	1	1	0	0	0	0	0	0	0	0
161	Honest	0.792615	-1.47494	1.41358	12.3679	0	0	1	1	1	1	1	1	0	1	1	1	1	0	1	1	0	0	1	0	1	0
162	Honest	1.17526	0.66742	0.472722	14.7852	0	0	1	1	1	1	1	1	0	1	1	1	1	1	1	1	1	0	0	1	0	0
163	Honest	0.856919	-0.0671419	0	11.8377	0	0	1	1	1	1	0	1	1	1	1	1	1	0	0	1	0	0	0	0	1	0
164	Honest	-0.640145	0.0332287	0.392442	8.35824	0	0	1	1	1	0	1	1	0	0	0	1	1	1	0	0	0	0	0	0	0	0
165	Honest	-0.0512752	0.45958	1.13045	12.6851	0	0	1	1	1	0	0	1	0	0	0	0	0	0	0	1	1	1	1	0	0	0
166	Honest	0.564154	-2.73399	2.18515	5.22884	0	0	1	1	1	1	0	1	1	1	0	1	1	1	0	1	1	1	0	0	1	0
167	Honest	-0.30031	-0.369753	0.993685	11.0364	0	0	1	1	1	1	1	1	1	1	1	0	1	0	0	0	0	0	0	0	0	0
168	Honest	-1.36638	0.285155	0.886252	11.2961	0	0	1	1	0	0	1	0	1	0	0	0	0	0	0	0	0	0	1	1	0	0
169	Honest	-0.17911	0.651954	0	17.3886	0	0	1	1	1	1	0	1	0	1	1	0	1	0	0	0	1	0	0	0	0	0
170	Honest	-0.695837	0.320316	0	16.3591	0	0	1	0	1	0	1	1	1	0	0	0	1	0	0	0	0	0	0	0	0	0
171	Honest	1.49643	1.28912	0.610356	16.2385	0	0	1	1	1	1	1	1	1	1	0	1	1	0	1	1	1	1	1	1	0	1
172	Honest	1.1233	0.597206	0.948187	9.45761	0	0	1	1	1	1	0	0	1	1	0	1	1	0	1	1	0	0	1	0	1	1
173	Honest	-0.30983	-0.0439668	0.0419357	16.5567	0	0	1	1	1	1	1	1	1	1	1	0	1	0	1	0	0	0	0	0	0	0
174	Honest	0.787658	-0.556208	1.36522	19.3238	0	0	1	1	1	1	1	1	1	1	0	1	1	0	1	1	1	0	1	0	0	0
175	Honest	1.27114	0.445124	0.444721	14.245	0	0	1	1	1	0	1	1	1	1	1	1	1	1	1	1	1	1	0	0	0	0
176	Honest	0.190158	0.425888	0.290915	20.5085	0	0	1	0	1	1	1	1	1	1	1	0	1	1	0	0	0	1	1	0	0	1
177	Honest	0.953863	-0.0778439	1.87596	3.7983	0	0	1	1	1	1	1	1	1	1	1	1	1	1	1	1	0	1	0	1	0	1
178	Honest	0.721044	-0.276902	1.31719	10.5864	0	0	1	1	1	0	1	1	1	1	1	0	1	1	0	0	1	1	0	0	0	1
179	Honest	1.02481	0.357676	0.981229	12.3186	0	0	1	1	1	1	1	1	0	1	0	1	1	1	1	1	0	0	1	0	0	0
180	Honest	1.14955	-0.577315	1.57343	18.7648	0	0	1	1	1	1	1	1	1	1	1	1	1	1	1	1	1	0	1	0	1	0
181	Honest	0.483209	1.39046	0	10.5919	0	0	1	1	1	0	1	1	1	1	1	1	1	0	1	0	0	0	1	1	1	0
182	Honest	0.2272	-0.336116	1.444	10.566	0	0	1	0	1	1	1	1	1	1	0	1	1	1	1	0	0	0	0	0	0	0
183	Honest	-0.471894	1.79944	1.03751	22.8344	0	0	1	1	1	1	1	0	0	0	0	1	1	1	0	0	0	0	0	0	0	0
184	Honest	0.576096	-1.02243	1.32421	11.4541	0	0	1	1	1	0	1	1	1	1	1	0	1	1	0	1	1	1	0	1	0	0
185	Honest	-0.961841	1.0341	0.877763	10.5854	0	0	1	1	1	1	1	1	0	0	0	0	0	0	0	0	0	0	0	0	0	0
186	Honest	0.0742004	-0.82504	1.80939	12.932	0	0	1	1	1	0	1	0	1	1	0	1	0	0	0	0	1	0	0	1	0	0
187	Honest	-2.17332	-0.114956	1.76787	15.8636	0	0	0	0	0	0	0	0	0	0	0	0	0	0	0	0	0	0	0	0	0	0
188	Honest	-0.84278	1.439	0.850487	18.4294	0	0	1	1	1	1	0	1	1	1	0	0	0	0	0	0	0	0	1	0	0	0
189	Honest	-0.292497	1.45319	0.265187	13.909	0	0	1	1	1	1	0	1	1	1	0	1	1	1	0	0	0	0	0	0	0	0
190	Honest	-0.404086	-0.0223404	1.18022	15.864	0	0	1	0	1	0	1	0	1	0	0	0	0	0	0	0	1	0	0	1	0	0
191	Honest	-0.5518	-0.840084	2.70825	6.84172	0	0	1	1	0	1	0	1	1	1	0	0	0	0	0	0	0	0	0	0	0	0
192	Honest	-0.150851	-1.87014	0.513576	11.0914	0	0	1	1	1	0	0	1	1	1	1	0	0	1	0	0	0	0	0	1	0	0
193	Honest	1.38611	0.621141	0.757502	12.6851	0	0	1	0	1	1	1	0	1	1	0	1	1	1	1	0	1	1	0	1	1	0
194	Honest	1.00409	-1.05415	0.74885	7.19464	0	0	1	1	1	1	1	1	1	1	1	1	1	1	0	1	0	1	0	0	0	0
195	Honest	0.461883	1.11597	0.634348	11.6002	0	0	1	1	1	1	1	1	1	0	0	0	1	0	0	0	1	0	0	0	0	0
196	Honest	0.290888	0.361698	0.799946	12.5667	0	0	1	1	1	1	1	1	0	0	1	1	1	0	1	0	0	0	0	0	0	0
197	Honest	0.720314	1.337	0.140332	11.5904	0	0	1	1	1	1	1	1	1	1	1	1	0	0	1	1	0	1	0	0	0	0
198	Honest	0.367406	0.947456	1.05637	12.3827	0	0	1	0	1	1	0	1	1	1	0	0	1	1	0	0	0	0	1	0	0	0
199	Honest	-0.495724	1.09308	1.29661	18.2745	0	0	1	1	1	0	1	0	0	0	1	1	0	0	0	0	1	0	0	0	0	0
200	Honest	-1.16101	0.388049	1.98997	10.0926	0	0	1	0	0	0	0	0	0	0	0	0	0	0	0	0	0	0	0	0	0	0
201	Honest	0.91827	-0.851437	0.936915	14.1368	0	0	1	1	1	1	1	1	1	1	1	1	1	0	1	0	0	1	0	0	1	0
202	Honest	0.310565	-0.648973	1.36158	11.5339	0	0	1	1	1	1	1	1	0	1	0	1	0	0	0	0	1	0	0	1	0	0
203	Honest	0.30533	-2.59416	1.15745	16.1946	0	0	1	1	1	0	1	1	1	1	1	1	1	0	1	0	1	0	1	0	0	0
204	Honest	-1.20379	0.0791942	0.19902	5.20039	0	0	1	0	1	0	1	0	1	0	0	0	0	0	0	0	0	0	0	0	0	0
205	Honest	-0.0440659	-0.230408	0.840783	14.4604	0	0	1	1	1	0	1	1	0	1	1	1	0	1	0	0	0	1	0	0	0	0
206	Honest	0.473671	-0.619314	2.01305	15.6696	0	0	1	1	1	1	1	1	1	1	0	1	1	1	0	1	0	1	0	0	0	0
207	Honest	-0.241474	0.416292	1.30774	16.7008	0	0	1	1	1	1	0	1	0	1	0	1	1	0	0	0	1	0	0	0	0	0
208	Honest	0.171106	0.405182	0.544158	9.74784	0	0	1	1	1	1	0	1	1	0	0	1	0	0	0	0	1	0	0	0	0	0
209	Honest	-1.92652	-1.63053	1.20738	10.5294	0	0	0	0	0	0	0	0	0	0	1	0	0	0	0	0	0	0	0	0	0	0
210	Honest	-1.21478	-0.442335	1.29704	15.3606	0	0	1	1	1	1	1	1	0	0	1	0	0	0	0	0	0	0	0	0	0	0
211	Honest	1.08516	0.293447	0.471973	17.3884	0	0	1	1	1	1	1	1	1	1	1	1	1	1	0	1	0	1	0	1	0	0
212	Honest	0.264583	-0.668996	0.246418	17.6046	0	0	1	1	1	1	1	1	1	1	1	1	0	1	0	0	0	1	0	0	0	0
213	Honest	-0.056742	-0.733362	1.08729	7.33126	0	0	1	0	1	1	1	1	1	0	0	0	0	1	1	1	0	0	1	0	0	0
214	Honest	1.00394	1.31839	0.690513	7.60205	0	0	1	1	1	1	1	1	1	1	0	1	1	0	1	1	0	1	0	0	1	0
215	Honest	1.13047	0.668798	1.41537	10.2586	0	0	1	1	1	1	0	1	1	1	1	0	1	1	0	1	1	0	0	1	0	0
216	Honest	0.0002083	-0.809843	1.01293	6.1182	0	0	1	1	1	1	1	1	1	1	1	1	0	1	0	1	0	0	0	0	1	0
217	Honest	-0.76798	-0.398254	1.29488	13.6464	0	0	1	1	1	0	1	1	1	0	0	0	0	0	0	0	0	0	0	0	0	0
218	Honest	-0.999319	-1.2718	0.835649	9.73027	0	0	0	1	0	0	1	0	0	0	1	0	0	0	1	0	0	0	0	0	0	0
219	Honest	1.07951	-1.65455	1.51517	12.1354	0	0	1	1	1	1	1	1	1	1	0	1	1	1	1	1	1	1	0	1	0	0
220	Honest	-0.847147	0.049751	0	10.5801	0	0	1	1	1	0	0	1	0	0	1	0	0	0	0	0	0	0	1	0	0	0
221	Honest	0.549867	-2.10389	1.0088	17.2363	0	0	1	1	1	1	1	1	1	1	0	1	0	0	1	0	1	0	0	1	0	0
222	Honest	1.43418	-0.0383312	0	10.5234	0	0	1	1	1	1	1	1	1	1	1	1	1	1	1	1	0	0	0	1	0	0
223	Honest	0.0481148	-0.558017	1.78557	15.3626	0	0	1	1	1	1	0	1	1	1	1	0	0	1	0	0	0	0	0	0	0	0
224	Honest	0.573839	0.310443	0.360286	11.4393	0	0	1	1	1	1	0	1	1	1	0	1	1	1	1	1	0	0	1	1	0	0
225	Honest	1.65294	-0.0162776	1.24073	13.4961	0	0	1	1	0	1	1	1	1	1	0	1	1	1	1	1	0	1	0	1	1	1
226	Honest	-1.12713	-0.0403864	1.14476	6.91118	0	0	1	1	0	1	1	0	0	0	1	0	1	0	0	0	0	0	1	0	0	0
227	Honest	0.526372	0.522293	1.10657	1.72817	0	0	1	0	1	1	1	1	1	0	0	1	1	0	1	1	1	0	1	0	0	0
228	Honest	-0.563427	0.4924	0.404612	21.1442	0	0	1	1	0	1	0	0	1	0	0	0	0	0	0	0	0	0	0	0	0	0
229	Honest	0.467942	-0.195011	1.00678	15.1888	0	0	1	0	1	1	1	1	1	1	0	0	0	0	0	1	1	0	1	0	0	0
230	Honest	-0.531913	-0.564913	2.65722	9.0886	0	0	1	1	1	1	1	1	0	1	1	0	1	0	0	0	0	0	0	0	0	0
231	Honest	0.783682	-0.544565	0.6549	14.3409	0	0	1	1	1	1	1	1	1	1	0	1	1	0	1	1	0	0	0	0	0	0
232	Honest	-0.78441	-0.680835	0.662393	9.62511	0	0	0	1	1	1	1	0	0	0	0	0	0	0	0	1	0	0	1	0	0	0
233	Honest	-0.243365	-1.07787	0.551392	13.2886	0	0	1	1	1	1	0	1	1	0	0	0	0	0	0	0	0	0	0	0	0	0
234	Honest	-0.184757	-0.27071	0.772819	7.87404	0	0	1	1	1	0	1	1	1	0	0	0	1	0	1	1	0	0	0	0	0	0
235	Honest	2.1192	0.32621	1.22407	15.5462	0	0	1	1	1	1	1	1	1	1	1	1	1	1	1	1	1	0	1	1	1	1
236	Honest	1.39071	0.206285	0.278089	17.1427	0	0	1	1	1	0	1	1	1	1	1	1	1	0	1	0	0	0	1	1	0	0
237	Honest	-0.285404	-1.58321	2.57982	6.98296	0	0	1	1	1	1	1	0	1	0	1	0	0	0	0	1	1	0	1	0	0	0
238	Honest	0.365947	-0.847134	1.50093	18.7014	0	0	1	1	1	1	1	0	1	1	0	1	1	0	1	1	0	0	0	0	0	0
239	Honest	-0.332064	-2.63977	0.790129	17.7371	0	0	1	1	1	1	1	1	1	0	0	1	1	0	0	0	0	0	0	0	0	0
240	Honest	-0.514185	-0.184217	1.46069	12.2567	0	0	1	1	1	1	1	1	0	0	1	0	1	0	0	0	0	0	0	0	0	0
241	Honest	-0.496378	0.596353	1.06413	18.1472	0	0	1	1	1	0	1	0	1	1	0	0	0	0	0	0	0	0	0	0	0	0
242	Honest	-0.196891	0.228812	0.679225	14.5822	0	0	1	1	1	0	1	1	1	1	1	0	1	0	0	0	0	0	0	0	0	0
243	Honest	-0.562087	-0.601247	0.998195	9.29424	0	0	1	1	1	1	0	1	1	0	1	0	1	0	0	0	0	0	0	0	0	0
244	Honest	1.96623	-0.731893	0.0970446	9.39357	0	0	1	0	1	1	1	1	1	1	1	1	1	1	0	1	0	1	1	0	1	0
245	Honest	2.0248	-0.498686	1.34935	13.7577	0	0	1	1	1	1	1	1	1	1	1	0	1	0	1	1	1	0	1	1	0	0
246	Honest	-1.5444	-2.69451	1.26446	16.5656	0	0	1	1	1	1	1	1	1	0	0	0	0	0	0	0	0	0	0	0	0	0
247	Honest	2.0365	-0.212398	0.238504	12.9699	0	0	1	1	1	1	1	1	1	1	1	1	1	0	1	1	1	1	1	1	1	1
248	Honest	0.598048	0.532341	0.44326	11.6313	0	0	1	1	1	1	0	1	1	1	1	1	1	1	0	0	0	0	1	1	0	0
249	Honest	0.230476	3.90097	0	8.86067	0	0	1	1	1	1	0	1	0	1	0	0	1	0	0	0	0	0	0	0	0	0
250	Honest	0.666062	0.650153	0.404206	21.2171	0	0	1	1	1	1	1	1	1	1	0	1	0	0	0	0	0	0	0	0	0	0
251	Honest	-0.963061	0.718737	2.33052	7.09586	0	0	1	0	1	1	1	1	0	0	0	0	0	0	0	0	0	0	0	0	0	0
252	Honest	-1.19971	0.750862	1.24993	10.8288	0	0	1	1	1	1	1	1	0	0	0	0	0	0	0	0	1	0	0	0	0	0
253	Honest	1.28407	1.27676	1.00084	9.92738	0	0	1	1	1	1	1	1	1	1	1	1	0	1	0	1	0	0	1	1	1	0
254	Honest	1.59265	1.66772	0	14.1765	0	0	1	1	1	1	1	0	1	1	1	1	1	1	0	1	1	1	1	1	1	1
255	Honest	2.12169	0.850731	0.639327	17.1145	0	0	1	1	1	1	0	1	1	1	0	1	1	1	1	1	1	1	1	1	1	1
256	Honest	0.537683	0.285828	1.34614	8.05046	0	0	1	1	1	1	1	1	1	1	1	1	1	0	0	0	0	0	1	0	0	0
257	Honest	-2.19406	-2.08535	0.252112	11.0214	0	0	1	1	1	1	0	0	0	0	1	0	0	0	0	0	0	0	0	0	0	0
258	Honest	0.481346	1.77654	0.91646	17.3018	0	0	1	1	1	1	1	1	0	0	1	0	1	1	1	1	0	0	0	0	0	0
259	Honest	1.01003	-1.46351	0.896528	10.4913	0	0	1	1	1	1	1	1	0	0	1	0	1	0	1	0	0	0	0	0	1	0
260	Honest	-1.11856	1.28653	0	20.6526	0	0	1	1	0	1	1	0	1	1	1	0	0	0	0	1	0	0	0	0	0	0
261	Honest	-2.18696	-1.41304	0.633005	11.9457	0	0	0	1	0	0	0	0	1	0	0	0	0	0	0	0	0	0	0	0	0	0
262	Honest	-0.179519	0.823963	0.0264101	10.2026	0	0	1	1	1	1	1	1	1	0	1	0	0	0	0	0	0	1	0	0	0	0
263	Honest	0.71811	-0.361186	1.15801	14.3838	0	0	1	1	1	1	1	1	0	1	1	1	1	0	0	0	0	0	0	0	1	0
264	Honest	-2.03292	-2.63689	1.39031	12.6211	0	0	1	0	0	0	0	0	0	0	0	0	0	0	0	0	0	0	0	0	0	0
265	Honest	0.246148	-1.21513	1.48807	15.4351	0	0	1	1	1	0	1	1	0	1	1	1	1	0	1	1	0	0	0	0	0	0
266	Honest	0.393976	0.563546	0.882025	9.14885	0	0	1	0	1	1	1	0	1	1	1	1	0	1	1	1	0	0	0	0	0	0
267	Honest	0.196712	1.04619	0	6.72635	0	0	1	1	1	1	1	1	1	1	1	0	0	1	0	0	0	0	0	1	0	0
268	Honest	0.612172	1.20331	0.377291	13.6766	0	0	1	0	1	1	1	1	0	1	1	1	1	0	0	1	0	0	1	0	0	0
269	Honest	-1.14263	-0.32892	1.8331	8.75333	0	0	0	1	0	0	1	0	1	0	0	0	0	1	0	0	0	0	0	0	0	0
270	Honest	-0.1854	-0.346491	0.426688	11.8605	0	0	1	1	1	1	1	1	0	1	1	1	0	0	1	1	0	0	0	0	0	0
271	Honest	2.53218	1.91793	0.190667	16.3043	0	0	1	1	1	0	1	1	1	1	1	1	1	1	1	1	1	1	1	1	0	1
272	Honest	-0.876816	-1.15109	0.309034	9.90907	0	0	1	0	1	1	1	1	0	0	1	0	0	0	0	0	0	0	0	0	0	0
273	Honest	-1.02982	0.450629	0	18.4679	0	0	1	0	1	1	0	0	1	0	0	0	0	0	0	0	0	0	1	1	0	0
274	Honest	-0.495694	0.308021	1.53262	17.1199	0	0	1	1	1	1	0	0	0	1	0	0	0	0	0	0	0	0	0	0	0	0
275	Honest	-0.937109	-1.30315	1.82952	11.8269	0	0	0	1	1	1	0	0	1	0	0	0	0	0	0	0	0	0	0	0	0	0
276	Honest	-1.2121	1.44736	0.183565	5.47023	0	0	1	0	1	1	0	0	0	0	0	0	0	0	0	0	0	0	0	0	0	0
277	Honest	0.816985	-2.08367	1.40156	15.4953	0	0	1	1	1	0	1	1	1	0	1	1	1	1	0	1	1	1	0	0	0	0
278	Honest	1.89558	-0.339712	0.205382	14.0136	0	0	1	1	1	1	1	1	1	1	1	1	1	1	1	1	0	1	1	0	1	1
279	Honest	-1.63932	-0.0969021	0.811034	14.5627	0	0	1	0	1	0	0	1	1	1	0	0	0	0	0	0	0	0	0	0	0	0
280	Honest	1.50055	0.580104	0	11.6842	0	0	1	1	1	1	1	1	1	1	1	0	1	1	1	1	1	1	1	1	0	0
281	Honest	-3.21894	-0.193917	1.48532	8.98001	0	0	0	1	0	0	0	0	0	0	0	0	0	0	0	0	0	0	0	0	0	0
282	Honest	0.319767	-0.439621	0.498532	13.5561	0	0	1	1	1	1	0	1	0	1	1	0	1	0	0	0	0	0	0	1	0	0
283	Honest	0.571975	-0.339092	0.589207	14.8061	0	0	1	1	1	1	1	1	1	1	1	1	1	1	1	1	0	0	0	0	0	0
284	Honest	0.436991	0.405613	0.983445	13.1114	0	0	1	1	1	1	1	1	1	0	0	1	0	0	1	0	0	0	0	0	0	0
285	Honest	1.72233	-0.846188	1.04959	11.7529	0	0	1	1	1	1	1	1	1	1	0	1	1	1	1	0	0	1	1	1	0	1
286	Honest	0.251995	0.500351	0.293948	12.2217	0	0	1	1	1	1	1	0	1	0	1	1	1	1	0	0	1	1	0	1	0	0
287	Honest	-0.251097	-1.42135	0.224025	12.6157	0	0	1	1	1	1	1	1	1	0	0	0	0	1	0	0	0	0	0	0	0	0
288	Honest	-1.66702	-0.608542	2.22793	12.1442	0	0	1	1	1	1	1	0	0	0	0	0	0	0	0	0	0	0	1	0	0	0
289	Honest	-0.599977	0.351179	1.34619	12.2341	0	0	0	1	1	1	1	1	1	1	0	0	0	0	0	0	0	0	0	0	0	0
290	Honest	-0.210711	0.436523	1.30134	15.8746	0	0	1	1	1	0	0	1	0	1	0	0	0	0	0	0	0	0	0	1	0	0
291	Honest	1.31612	-0.199454	0.308377	11.2975	0	0	1	1	1	0	1	1	1	1	1	1	1	1	1	0	0	1	1	0	1	0
292	Honest	1.8732	1.8832	0.18061	16.7849	0	0	1	1	1	1	1	1	1	1	1	1	1	1	1	1	1	1	1	1	1	1
293	Honest	0.988619	-1.8838	1.2388	11.4262	0	0	1	1	1	1	1	1	1	1	1	1	1	1	0	0	1	1	1	0	0	1
294	Honest	0.531926	0.0239732	0.682135	11.2967	0	0	1	1	1	1	1	1	1	1	1	1	1	1	1	1	0	0	0	1	0	0
295	Honest	1.67565	0.0187818	0.614395	12.4085	0	0	1	1	1	0	1	1	1	1	1	1	1	0	0	1	1	1	0	0	0	1
296	Honest	-0.989772	0.210699	0.249341	6.88149	0	0	1	1	1	1	0	0	0	1	1	0	0	0	0	0	0	0	0	0	0	0
297	Honest	-0.992211	-0.333925	0.700082	11.0235	0	0	1	1	1	1	1	1	1	0	0	0	0	0	0	0	0	0	0	0	0	0
298	Honest	-0.632326	0.608422	0.509123	10.7667	0	0	0	1	1	1	1	0	0	0	0	0	0	0	0	0	1	0	0	0	1	0
299	Honest	2.19816	1.16893	0.192382	12.247	0	0	1	1	1	1	1	1	1	1	1	1	1	1	1	1	1	1	1	1	1	1
300	Honest	-0.865965	-0.301608	1.11237	5.20352	0	0	1	1	0	1	1	1	0	1	1	0	0	0	0	0	0	0	0	0	0	0
301	Honest	-0.00376785	-0.531599	0.772008	10.4514	0	0	1	1	1	1	1	1	1	1	0	1	1	1	0	1	0	0	0	1	0	0
302	Honest	1.67756	0.37856	0.797438	3.09129	0	0	1	1	1	1	1	1	1	1	1	1	1	1	1	1	0	1	0	1	0	1
303	Honest	-0.743412	-0.125374	1.30504	8.42538	0	0	1	0	1	1	1	0	1	1	1	0	0	0	0	0	0	0	1	0	0	0
304	Honest	-1.74483	0.273806	0.495945	6.01517	0	0	0	0	0	0	0	0	0	0	0	0	0	0	0	0	0	0	0	0	0	0
305	Honest	0.986423	-0.901086	0.925738	19.8024	0	0	1	1	1	1	1	1	1	1	1	1	1	1	1	1	1	0	0	1	0	0
306	Honest	-1.01616	0.075369	0	10.064	0	0	1	1	1	1	0	0	0	1	0	1	1	0	1	0	0	0	1	0	0	0
307	Honest	-0.212398	0.100233	0.0934497	16.1883	0	0	1	1	1	1	1	1	1	1	0	1	0	1	0	1	0	0	0	0	0	0
308	Honest	0.527625	-0.419775	1.22747	18.0448	0	0	1	1	1	1	1	1	1	0	1	1	1	0	1	0	1	0	0	0	0	0
309	Honest	0.454359	0.207101	0.607247	11.924	0	0	1	1	1	0	1	1	0	1	1	0	1	1	1	0	0	0	1	0	0	0
310	Honest	0.152631	1.282	0.539477	14.0055	0	0	1	1	1	0	0	1	0	1	0	0	0	1	0	1	0	0	0	0	0	0
311	Honest	1.91479	1.04091	0	12.4781	0	0	1	1	1	1	1	1	1	1	0	1	1	1	1	1	1	1	0	1	1	1
312	Honest	1.19589	-1.90045	1.28639	9.14414	0	0	1	1	1	1	1	1	1	0	1	1	1	1	1	0	1	0	0	0	0	0
313	Honest	0.50177	0.854697	0	17.1826	0	0	1	1	1	0	1	1	0	0	0	0	1	1	0	0	0	0	0	0	0	0
314	Honest	-0.259294	0.364721	0.8346	5.68318	0	0	1	1	1	1	1	1	1	1	0	1	1	0	0	0	0	0	0	1	0	0
315	Honest	-1.36436	0.554881	0.137165	12.3961	0	0	1	0	0	0	1	0	1	0	1	0	0	1	0	0	0	0	0	0	0	0
316	Honest	2.26003	0.327811	0	16.4877	0	0	1	1	1	1	1	1	1	1	0	0	0	1	1	1	1	0	0	1	0	1
317	Honest	1.50811	0.0945685	1.20406	12.9513	0	0	1	1	1	1	1	1	1	1	0	1	1	1	1	0	0	1	1	0	1	0
318	Honest	-0.773796	1.36191	1.13364	14.7017	0	0	1	1	1	1	1	0	1	1	0	0	1	0	0	0	0	0	0	0	0	0
319	Honest	-0.0222112	0.49686	0.485901	10.1104	0	0	1	0	1	0	0	1	0	0	1	1	0	1	0	0	0	0	0	0	0	0
320	Honest	0.689492	0.0457352	0.189077	11.0556	0	0	1	0	1	1	1	1	1	1	1	1	1	0	0	1	0	1	0	0	0	0
321	Honest	0.158985	1.10159	0.0253975	20.4389	0	0	1	1	1	0	1	1	1	1	0	1	1	0	1	0	0	0	1	0	0	0
322	Honest	0.594888	-1.19645	1.02185	10.2495	0	0	1	1	0	1	1	1	1	1	1	0	1	0	1	0	0	0	1	0	0	0
323	Honest	-0.154081	-1.15807	0.908323	9.58653	0	0	1	1	1	1	1	1	1	1	0	1	0	0	0	1	0	0	0	0	0	0
324	Honest	-0.281916	0.426568	0.227572	9.36135	0	0	1	0	1	0	0	1	0	0	1	1	0	1	0	0	0	0	0	0	0	0
325	Honest	-2.04209	-0.26475	0	15.7193	0	0	0	0	1	0	0	1	0	0	0	0	0	0	0	0	1	0	0	0	0	0
326	Honest	-1.78081	-0.658503	1.22765	10.6331	0	0	0	0	1	0	0	0	0	0	0	0	0	0	0	0	0	0	0	0	0	0
327	Honest	1.57916	0.823689	0.941624	14.6856	0	0	1	1	1	1	1	1	1	1	1	1	1	1	1	1	1	0	1	0	0	1
328	Honest	1.05002	0.0321439	0.697505	15.7107	0	0	1	1	1	1	1	1	1	1	1	0	0	1	1	0	0	1	0	1	1	0
329	Honest	1.71638	0.166358	1.37405	10.5763	0	0	1	1	1	1	1	1	1	1	1	1	1	1	1	1	1	1	1	1	0	0
330	Honest	1.21434	1.25443	0.87873	16.3221	0	0	1	1	1	1	1	1	1	1	1	1	1	1	1	1	0	1	1	0	0	0
331	Honest	-0.163665	1.43407	1.2636	14.6089	0	0	1	0	1	0	0	0	1	1	0	1	1	0	0	0	1	0	0	0	0	0
332	Honest	0.216081	-0.484914	1.24319	15.1989	0	0	1	1	1	1	1	1	1	1	0	1	1	1	1	0	0	0	1	0	0	0
333	Honest	-0.119555	-2.39327	1.32714	14.684	0	0	0	1	1	1	0	1	1	1	1	0	0	0	0	0	0	0	0	1	0	0
334	Honest	1.31172	1.12395	0.114017	7.53542	0	0	1	1	1	1	1	1	1	1	1	1	1	1	1	1	0	1	0	1	1	0
335	Honest	-0.352346	-1.16832	1.12366	11.3385	0	0	1	1	1	1	1	1	1	1	1	0	1	0	0	0	0	1	0	0	0	0
336	Honest	-0.05743	-1.44199	2.33842	17.5871	0	0	1	1	1	0	0	1	1	0	1	0	1	0	0	0	0	0	0	1	0	0
337	Honest	0.587511	0.18949	0.998857	11.4321	0	0	1	1	1	1	1	1	1	1	1	1	0	1	0	0	0	0	0	0	0	0
338	Honest	1.3248	0.419877	0.479775	22.7463	0	0	1	0	0	1	1	1	1	1	1	1	1	1	1	1	1	1	1	0	0	1
339	Honest	-0.103673	0.826946	0.337487	5.07117	0	0	1	1	1	1	1	1	1	0	1	1	0	0	1	0	1	0	1	0	0	0
340	Honest	0.796767	0.719923	1.29099	8.90297	0	0	1	1	1	1	1	1	1	1	1	1	1	1	1	1	1	0	0	1	0	0
341	Honest	0.223054	-0.821651	1.01324	6.86051	0	0	1	1	1	1	1	1	1	1	0	1	1	0	1	0	0	0	0	1	0	0
342	Honest	0.854309	-1.24758	0.80412	5.73337	0	0	1	1	1	0	0	1	1	1	1	1	1	0	1	0	1	0	0	0	0	0
343	Honest	1.28175	-0.363988	0.180497	15.2415	0	0	1	1	1	1	1	1	1	1	1	1	1	1	1	1	1	1	0	1	0	1
344	Honest	0.733743	-0.487801	1.17502	16.8349	0	0	1	1	1	1	1	1	1	1	1	1	1	1	1	0	0	0	0	0	0	0
345	Honest	0.194194	-1.29038	1.11532	12.9802	0	0	1	1	1	1	1	1	1	1	0	0	1	0	0	0	1	0	0	1	0	0
346	Honest	2.55609	-0.241061	1.48968	17.966	0	0	1	1	1	1	0	1	1	1	0	1	1	1	1	1	1	1	1	0	1	1
347	Honest	-0.455659	-1.62953	1.48195	7.02271	0	0	1	1	1	1	1	1	0	1	1	0	0	0	1	0	0	0	0	0	0	0
348	Honest	1.51175	1.65717	0.194733	16.8306	0	0	1	1	1	1	1	1	1	1	1	1	1	1	1	1	1	0	0	1	1	1
349	Honest	0.755502	-0.0688794	0.389973	10.7106	0	0	1	1	1	0	1	1	1	0	1	1	1	1	1	1	0	0	1	0	0	0
350	Honest	-0.602293	0.234798	0	12.7106	0	0	1	1	1	1	0	0	0	1	1	0	0	0	1	0	0	0	1	0	0	0
351	Honest	-2.45045	-0.571931	0.728708	10.8646	0	0	0	1	1	0	1	0	0	0	0	0	0	0	0	0	0	0	0	0	0	0
352	Honest	-0.22492	-0.685313	0.744892	13.8941	0	0	1	1	0	1	1	0	1	0	1	0	0	1	0	0	0	0	0	0	0	0
353	Honest	-1.44447	-1.41321	0.691342	14.033	0	0	1	0	1	0	1	0	0	1	1	0	0	0	1	0	0	0	0	0	0	0
354	Honest	-0.991272	0.220072	0.72466	13.8057	0	0	0	1	0	1	0	1	0	1	1	0	0	0	0	0	0	0	0	0	0	0
355	Honest	-0.534566	-0.899994	0.413836	9.31533	0	0	1	1	1	1	0	1	0	0	1	0	1	0	0	0	0	0	0	0	0	0
356	Honest	-0.170864	-1.05718	2.13421	5.81242	0	0	1	0	1	0	1	0	0	0	0	1	0	1	0	0	1	0	0	1	0	0
357	Honest	-1.74365	-0.102122	2.34421	12.2025	0	0	1	0	0	1	1	0	0	0	0	0	0	0	0	0	0	0	0	0	0	0
358	Honest	0.107254	0.855141	0.618601	11.1176	0	0	1	1	1	1	1	0	0	0	1	0	0	1	0	1	1	0	0	0	0	0
359	Honest	-1.51059	0.220815	0	22.162	0	0	1	1	1	0	0	1	0	0	0	0	0	0	0	0	0	0	0	0	0	0
360	Honest	0.156727	0.435449	0.0664258	13.867	0	0	1	1	1	1	0	1	1	1	0	1	0	1	0	0	0	1	0	0	1	0
361	Honest	0.156916	-1.22708	2.13877	8.95664	0	0	1	1	1	0	0	0	1	0	1	0	0	1	0	0	0	0	1	1	0	0
362	Honest	2.33921	-1.19366	0.506868	6.35409	0	0	1	1	1	1	1	1	1	1	1	1	1	1	1	1	1	1	1	0	1	1
363	Honest	-1.89195	-0.831037	0	16.7417	0	0	1	0	0	0	1	0	0	0	1	0	0	0	0	0	0	0	0	0	0	0
364	Honest	-0.93307	-0.340029	1.52314	14.9179	0	0	1	1	0	1	1	1	1	1	0	1	0	0	0	0	0	0	1	1	0	0
365	Honest	-0.383098	0.437684	0.211448	8.20987	0	0	1	1	1	1	1	0	1	1	1	0	0	0	0	0	0	0	0	0	0	0
366	Honest	-0.296895	-0.612794	1.41634	13.8849	0	0	0	1	1	1	1	1	1	1	1	0	1	0	0	0	0	1	0	1	0	0
367	Honest	-0.03435	1.06141	1.74684	13.1542	0	0	1	1	1	1	1	0	0	1	0	0	0	1	0	1	0	0	0	1	0	0
368	Honest	0.358777	-0.568586	0.755112	14.4563	0	0	1	1	1	1	1	1	1	1	0	1	1	1	1	0	1	0	0	0	0	0
369	Honest	-0.793162	-2.29013	1.36072	6.9162	0	0	1	0	1	1	1	1	1	0	0	0	0	0	0	0	0	0	0	0	0	0
370	Honest	0.593756	-0.0344934	1.02385	19.8958	0	0	1	1	1	1	1	1	1	1	1	0	1	1	0	0	1	0	0	1	0	0
371	Honest	1.25078	-0.20359	0	15.5218	0	0	1	1	1	0	1	1	1	1	1	1	1	0	1	1	0	1	0	1	1	0
372	Honest	-1.33818	0.861118	0	12.3477	0	0	0	1	0	1	1	1	0	0	0	0	0	0	0	0	0	0	0	0	0	0
373	Honest	1.552	-0.834748	0.12979	13.2897	0	0	1	1	1	1	1	1	1	1	1	1	1	1	1	1	0	0	0	1	0	0
374	Honest	0.137023	0.0742787	0.510866	17.4132	0	0	1	1	1	1	0	1	0	0	0	1	1	0	0	0	1	0	0	0	0	0
375	Honest	-2.03998	-0.919297	0.539396	13.0334	0	0	1	0	0	1	1	1	0	1	0	0	0	0	0	0	0	0	0	0	0	0
376	Honest	1.99426	-0.18305	0.0711037	15.3944	0	0	1	1	1	1	1	1	1	1	1	1	1	1	1	0	1	1	1	1	0	1
377	Honest	-0.559637	1.19528	0.385492	17.2337	0	0	1	1	1	1	0	1	0	1	0	1	1	1	1	1	1	0	0	0	0	0
378	Honest	-0.189625	-1.04339	0.703983	13.0442	0	0	1	1	1	1	1	1	0	0	1	1	0	1	0	0	0	0	0	0	0	0
379	Honest	-1.46939	-0.673367	2.0256	11.6656	0	0	1	0	0	0	0	0	0	1	1	0	0	0	0	0	0	0	0	0	0	0
380	Honest	-1.64176	-0.665434	0.0658061	7.51317	0	0	0	0	0	0	0	0	1	0	0	0	0	0	0	0	0	0	0	0	0	0
381	Honest	0.335517	-0.584179	0	19.3788	0	0	1	1	1	1	1	1	1	1	1	0	0	0	1	0	0	0	1	0	0	0
382	Honest	-0.289106	1.14124	0.387932	23.9121	0	0	1	1	1	1	1	1	0	1	1	0	1	1	0	1	1	0	0	0	0	0
383	Honest	0.409973	0.934136	0.888996	6.52117	0	0	1	1	1	1	1	1	0	0	1	0	1	1	1	0	1	0	0	0	0	0
384	Honest	1.09912	1.88492	0	19.576	0	0	1	1	1	1	1	1	0	1	0	1	1	1	1	1	0	0	1	0	0	0
385	Honest	-0.959893	-0.394947	1.13545	10.9069	0	0	1	1	0	1	1	1	1	0	0	0	0	0	1	1	0	0	0	0	0	0
386	Honest	-1.36079	-0.487499	0.290628	7.17063	0	0	0	1	1	1	0	0	0	0	1	0	0	0	0	0	0	0	0	0	0	0
387	Honest	0.0119216	-0.435575	0.773857	14.2349	0	0	1	1	0	1	0	1	1	1	1	1	1	1	1	0	0	0	0	0	0	0
388	Honest	-0.800998	0.229662	0.742549	15.8709	0	0	1	1	1	0	1	1	0	1	0	0	0	0	0	0	0	0	0	0	0	0
389	Honest	1.28051	-0.948255	1.39865	11.6315	0	0	1	1	1	1	1	1	1	1	1	1	1	1	1	1	1	0	0	1	0	0
390	Honest	2.24682	1.24603	0.0312806	16.9965	0	0	1	1	1	1	1	1	1	1	1	1	1	1	1	1	1	1	1	1	1	1
391	Honest	0.831986	0.77769	0.777392	13.2315	0	0	1	1	1	1	1	1	1	1	0	1	1	1	0	0	0	1	0	0	1	0
392	Honest	-1.03755	0.663173	0.0786981	17.6373	0	0	1	0	1	1	1	0	0	0	0	0	0	1	0	1	0	0	1	1	0	0
393	Honest	-1.94165	-0.71899	0.320389	9.95422	0	0	0	1	0	0	0	1	1	0	1	0	0	1	0	0	0	0	0	0	0	0
394	Honest	-0.254349	1.58292	0.524413	12.3082	0	0	1	1	1	0	0	0	1	0	1	0	0	1	0	0	1	0	0	0	0	0
395	Honest	0.0408641	0.125397	0.324719	14.3681	0	0	1	1	1	1	0	1	1	0	0	0	0	0	0	0	1	0	0	0	0	0
396	Honest	0.384393	2.45452	0.748032	16.1114	0	0	1	1	1	1	1	1	1	1	1	1	0	1	1	0	1	0	1	0	0	0
397	Honest	0.0761883	0.207928	0	12.6952	0	0	1	0	1	1	0	1	0	0	1	1	0	1	0	0	0	1	0	0	0	0
398	Honest	-1.22172	-0.948842	0.983203	13.4258	0	0	1	0	1	0	0	0	1	0	1	1	1	0	0	0	0	0	0	0	0	0
399	Honest	-1.4227	-2.50667	1.26794	16.5864	0	0	0	1	1	0	0	1	0	1	0	0	0	0	0	0	0	0	0	0	0	0
400	Honest	0.774923	-1.11856	1.34492	17.6167	0	0	1	1	1	1	1	1	1	1	0	1	1	1	0	0	1	1	0	0	0	0
401	Honest	0.0810131	-0.446025	1.45256	10.1658	0	0	1	1	1	1	1	1	0	1	0	1	1	0	0	1	0	0	0	0	0	0
402	Honest	0.0525134	-1.22244	1.21182	11.4473	0	0	1	1	1	1	0	1	0	1	1	0	1	1	0	0	0	0	0	0	0	1
403	Honest	1.51716	-0.00594787	1.06444	6.89252	0	0	1	1	1	1	1	1	1	1	1	1	1	1	0	1	0	1	0	1	0	0
404	Honest	0.961573	-0.806927	1.18276	8.76343	0	0	1	1	1	1	1	1	1	1	0	1	0	1	0	1	1	1	0	0	0	1
405	Honest	-0.30221	-0.0129082	1.49434	7.70142	0	0	1	1	1	1	1	1	1	1	1	1	0	1	0	1	0	1	0	0	0	0
406	Honest	-0.182926	-0.264876	0.235899	15.5444	0	0	1	1	1	1	1	0	0	0	0	0	1	0	0	0	0	0	1	0	0	0
407	Honest	0.117567	-0.040786	0.748549	6.48371	0	0	1	1	1	0	0	1	1	1	1	1	1	0	1	0	0	0	1	0	0	0
408	Honest	-1.03315	0.133404	1.05393	15.7303	0	0	1	0	1	1	0	0	1	0	0	0	0	1	0	0	0	0	0	0	0	0
409	Honest	-0.878623	0.537708	0.826318	11.6068	0	0	1	1	1	0	0	1	1	1	0	0	0	1	1	0	0	0	0	0	0	0
410	Honest	-0.213503	-0.824799	1.11178	12.5584	0	0	1	1	1	1	0	1	1	0	1	1	0	0	0	0	0	0	0	1	0	0
411	Honest	-0.51294	0.726483	0.293128	14.5283	0	0	1	0	1	0	1	1	1	1	0	0	0	0	0	1	0	0	0	0	0	0
412	Honest	0.28854	-0.854282	1.15705	14.3818	0	0	1	1	1	1	1	1	1	1	1	0	0	1	1	0	0	0	0	1	0	1
413	Honest	0.491781	0.495759	0.0347577	18.189	0	0	1	1	1	1	0	1	1	1	1	1	0	1	1	1	0	0	1	0	0	0
414	Honest	-0.204126	-0.658253	1.70634	14.3906	0	0	1	1	1	1	1	1	0	0	1	0	0	0	1	0	0	0	0	1	0	0
415	Honest	1.03966	1.65917	0	6.3519	0	0	0	1	1	1	1	1	1	1	0	1	1	1	1	0	0	1	1	1	0	0
416	Honest	-0.174841	-1.75326	0.168479	0.5	0	0	1	1	1	1	1	1	1	0	0	0	0	1	0	1	0	0	1	0	0	0
417	Honest	-0.618027	-0.966503	1.39238	15.3209	0	0	1	0	1	1	0	0	1	1	0	1	0	1	1	0	0	0	0	0	0	0
418	Honest	-1.27038	0.250806	0.57243	6.92842	0	0	1	1	1	1	0	1	0	0	0	0	0	0	0	0	0	0	0	0	0	0
419	Honest	-0.791865	1.00159	0.332028	9.58651	0	0	1	1	1	1	0	1	0	1	0	0	0	0	0	0	0	0	0	0	0	0
420	Honest	-0.360783	0.553173	0.877708	16.4757	0	0	0	1	1	0	0	0	0	0	1	0	1	0	0	0	0	0	0	0	0	0
421	Honest	-1.25409	-0.6662	0.634777	13.0054	0	0	1	0	0	1	0	0	1	0	0	0	0	0	0	0	0	0	0	0	0	0
422	Honest	0.0694861	0.132371	0.570874	7.96268	0	0	1	1	1	0	1	1	1	1	0	0	0	0	0	0	0	1	0	0	0	0
423	Honest	-1.59677	0.83397	1.06516	6.39964	0	0	1	1	1	0	0	0	0	0	0	0	0	0	0	0	0	0	0	0	0	0
424	Honest	0.667201	-0.992859	1.17947	10.9997	0	0	1	1	1	0	0	1	1	0	1	1	1	0	0	0	1	0	0	0	0	0
425	Honest	-1.40338	0.619006	0.583249	12.5505	0	0	0	1	0	1	0	0	0	0	0	0	0	0	0	0	0	0	0	0	0	0
426	Honest	0.659636	-0.841884	0.617353	15.9141	0	0	1	1	1	1	1	1	1	1	1	0	1	1	0	0	1	1	0	1	0	0
427	Honest	1.59031	0.869496	0.883004	13.3035	0	0	1	1	1	1	0	1	1	1	1	1	1	1	1	1	1	1	0	1	1	0
428	Honest	-0.20062	0.555047	1.04162	6.63294	0	0	1	0	1	1	0	1	1	1	0	1	1	0	1	0	0	1	1	0	0	0
429	Honest	0.351908	0.401696	0.167732	12.0998	0	0	1	1	1	1	1	1	1	0	1	1	1	0	0	0	0	0	0	0	0	1
430	Honest	-0.904489	-0.00150409	0.216033	15.2017	0	0	1	1	1	1	1	1	1	1	0	0	0	1	0	0	0	1	0	0	0	0
431	Honest	0.67014	0.0706281	0.992469	10.1743	0	0	1	1	1	1	1	1	0	0	0	1	1	1	0	0	0	0	0	0	0	0
432	Honest	-2.03634	0.256121	1.29345	11.1631	0	0	0	0	0	1	0	0	0	0	0	0	0	0	0	0	0	0	0	0	0	0
433	Honest	-1.29235	0.960585	0	20.4052	0	0	1	0	1	1	1	0	1	0	0	0	0	0	0	0	0	0	0	0	0	0
434	Honest	0.414674	-0.621417	1.39708	17.445	0	0	1	1	1	1	1	1	1	1	1	1	1	0	0	0	1	0	0	0	0	0
435	Honest	-0.205592	-2.00923	1.54034	9.3494	0	0	1	1	1	1	0	1	1	0	0	0	0	1	0	0	1	0	0	0	0	0
436	Honest	0.5177	0.722822	0.419206	14.1901	0	0	1	1	1	0	0	0	0	1	1	0	1	0	1	1	0	0	1	0	0	0
437	Honest	1.417	2.06021	0.632124	17.0448	0	0	1	1	1	1	1	1	1	1	0	1	1	1	1	1	1	1	0	0	1	0
438	Honest	-2.36153	-1.35011	0.960596	9.7567	0	0	1	0	1	0	0	0	0	0	0	0	0	0	0	0	0	0	0	0	0	0
439	Honest	0.205991	-0.486499	0	17.4947	0	0	1	1	1	1	1	1	1	1	1	1	1	1	0	0	0	0	0	0	0	0
440	Honest	-0.306963	1.12073	0.733244	10.2654	0	0	1	0	1	1	1	1	1	0	1	1	1	0	0	0	0	0	0	1	0	0
441	Honest	1.33319	0.71596	1.3423	15.1979	0	0	1	1	1	1	1	1	1	1	1	1	1	1	0	1	1	1	0	1	0	0
442	Honest	-0.0741299	-0.504731	1.24417	9.67159	0	0	1	1	1	0	1	1	1	0	1	0	1	1	1	0	1	0	0	0	0	0
443	Honest	0.559195	1.13226	0	14.483	0	0	1	0	1	1	1	0	1	1	1	1	1	1	1	1	0	0	0	1	0	0
444	Honest	0.452318	-1.40661	1.55588	0.59057	0	0	1	1	1	1	1	1	0	1	0	1	1	1	0	1	0	0	1	0	0	0
445	Honest	-0.0259625	-0.621969	1.61624	10.657	0	0	1	1	1	1	1	1	1	1	0	1	0	0	0	0	0	0	0	0	0	0
446	Honest	1.02713	-1.26287	0.892891	12.1528	0	0	1	0	1	0	1	1	1	1	0	1	1	1	1	0	1	0	1	0	0	0
447	Honest	-0.156447	-0.272445	0.650057	12.0552	0	0	1	1	1	1	1	1	0	0	1	0	0	0	0	0	0	0	1	0	0	0
448	Honest	2.37896	-0.0424526	0	27.0371	0	0	1	1	1	1	1	1	1	1	1	1	1	1	1	1	1	1	1	0	0	0
449	Honest	-0.755763	-0.786916	1.13408	15.3144	0	0	0	1	1	1	0	1	0	0	1	1	0	0	0	0	0	0	0	0	0	0
450	Honest	0.810598	-1.15374	1.28795	12.8541	0	0	1	1	1	1	1	1	1	1	1	1	1	1	1	0	1	0	1	0	0	0
451	Honest	-1.14559	-1.52451	1.43407	18.07	0	0	1	0	0	1	1	0	0	1	0	1	0	0	0	0	0	0	0	0	0	0
452	Honest	0.458593	-0.636819	1.24385	17.2586	0	0	1	1	1	1	0	1	1	1	1	0	1	1	0	0	1	1	0	0	0	0
453	Honest	-0.90752	-0.34417	0.299329	10.0428	0	0	1	1	0	1	0	1	0	0	0	0	0	0	0	0	1	0	0	0	0	0
454	Honest	-0.163981	-0.453549	1.22866	15.4875	0	0	1	1	1	0	1	1	0	0	0	0	0	0	0	1	1	0	0	0	0	0
455	Honest	-1.09742	0.638534	0.686267	14.8017	0	0	1	1	1	1	0	0	0	1	1	0	0	0	0	0	0	0	0	0	0	0
456	Honest	0.488326	0.548893	0.311457	12.2673	0	0	1	1	1	0	0	1	1	0	1	1	0	1	1	0	0	1	0	0	0	0
457	Honest	-0.133227	0.281223	0	12.7973	0	0	1	1	1	1	1	1	1	0	1	1	1	0	0	1	0	0	0	0	0	0
458	Honest	1.21438	0.746928	0.71446	8.55509	0	0	1	1	1	1	1	1	1	1	1	1	1	1	1	1	0	1	1	0	0	0
459	Honest	0.426873	1.32511	0.210879	13.0324	0	0	1	1	1	0	1	1	1	0	0	1	1	0	0	0	0	0	0	1	0	0
460	Honest	0.804412	-0.0598219	1.23879	8.55141	0	0	1	1	1	1	1	1	1	0	0	0	1	1	1	1	0	1	0	1	1	0
461	Honest	-0.601645	0.914296	1.36228	8.31282	0	0	1	0	0	0	0	1	1	0	1	0	0	0	0	1	0	0	0	0	0	0
462	Honest	-0.571574	-1.2562	0.395025	11.787	0	0	1	1	0	1	1	0	1	1	0	0	1	1	0	1	0	0	0	0	0	0
463	Honest	-0.636615	-0.607213	0.802873	14.5137	0	0	1	1	1	1	0	1	0	0	1	0	0	1	0	1	0	0	0	0	0	0
464	Honest	-0.317838	-0.281174	1.51457	7.68639	0	0	1	1	1	1	1	0	1	1	0	1	0	1	0	1	1	0	0	0	1	0
465	Honest	-0.484108	0.370603	0.182364	15.0947	0	0	1	1	1	0	1	1	1	0	0	0	0	0	0	0	1	0	0	0	0	0
466	Honest	0.84647	0.224739	1.33212	6.30592	0	0	1	1	1	1	1	1	1	1	1	1	1	1	0	0	1	0	0	0	0	1
467	Honest	-1.00331	1.40614	0	11.9349	0	0	1	1	1	1	0	1	0	1	1	0	0	0	0	0	0	0	0	0	0	0
468	Honest	0.30547	-0.507001	0.884688	16.8456	0	0	1	0	1	0	0	1	0	1	1	1	0	0	0	0	0	0	0	1	0	0
469	Honest	-1.51004	0.917808	0	11.5684	0	0	1	0	1	1	1	0	0	0	0	0	0	1	0	0	0	0	0	0	0	0
470	Honest	-0.101676	0.164447	0.0623113	21.8236	0	0	1	0	1	1	1	1	0	1	1	0	0	1	0	0	0	0	0	0	0	0
471	Honest	0.936039	-0.865903	0.010055	10.8878	0	0	1	1	1	0	1	1	0	1	1	1	1	0	0	1	0	1	1	0	0	0
472	Honest	0.497122	-1.123	1.12196	12.6179	0	0	1	1	1	0	0	1	1	1	1	1	1	0	1	1	1	0	1	0	0	0
473	Honest	0.0665769	1.3015	0.257299	14.2754	0	0	1	1	1	1	1	1	1	0	1	0	0	0	0	0	0	0	0	0	0	0
474	Honest	-0.318084	-0.545864	0.496542	12.8063	0	0	1	1	1	0	1	1	1	0	0	1	1	1	0	1	0	0	0	0	0	0
475	Honest	0.462451	-0.545773	1.59839	11.4085	0	0	1	1	1	0	1	1	1	1	1	0	0	0	1	0	0	0	0	0	0	1
476	Honest	1.65158	0.7133	1.0956	17.9516	0	0	1	0	1	1	1	1	1	1	1	1	1	1	1	0	1	1	0	1	0	0
477	Honest	0.00506191	-0.180091	0.106268	7.71649	0	0	1	1	1	0	1	1	1	1	1	1	1	1	0	1	0	0	0	0	0	0
478	Honest	0.405261	-0.221419	0.18032	15.9699	0	0	1	1	1	1	1	1	1	1	1	0	0	1	0	0	1	0	0	0	0	0
479	Honest	0.604346	1.63451	0.344223	9.69087	0	0	1	1	1	0	1	1	1	0	1	1	1	0	1	1	1	0	0	1	0	0
480	Honest	-0.595533	-0.212186	0.640999	10.6361	0	0	1	0	1	1	0	1	0	0	0	1	0	0	0	0	0	0	0	0	0	0
481	Honest	0.492365	0.735455	0.231269	10.8486	0	0	1	1	1	1	1	1	0	1	1	0	0	0	1	1	0	0	0	1	0	0
482	Honest	-3.23038	-1.34481	1.0544	8.66036	0	0	0	0	0	0	0	0	0	0	0	0	0	0	0	0	0	0	0	0	0	0
483	Honest	-0.753058	-1.48721	0.927626	16.1111	0	0	1	0	1	0	0	0	1	1	1	0	1	1	0	0	1	0	0	0	0	0
484	Honest	0.746719	1.98448	0.301915	9.46119	0	0	1	1	1	1	1	1	1	0	0	1	1	1	0	0	1	1	0	0	0	0
485	Honest	-1.53848	-1.34018	1.29488	13.391	0	0	1	1	0	0	0	0	0	0	0	1	0	0	1	0	0	0	0	0	0	0
486	Honest	1.38749	1.30937	0.211764	16.5477	0	0	1	1	1	1	1	1	1	1	1	1	0	1	1	1	1	1	0	0	0	0
487	Honest	0.795657	-0.840756	1.524	11.9342	0	0	1	1	1	1	1	1	1	1	1	1	1	1	1	0	1	0	1	1	0	1
488	Honest	0.566261	0.98876	0.0129217	12.8784	0	0	1	0	1	1	1	1	1	1	1	1	0	0	0	0	0	0	0	0	0	0
489	Honest	-0.205885	0.390192	0.00549346	20.0255	0	0	1	1	1	1	1	1	1	0	1	0	1	0	1	0	1	0	0	1	0	0
490	Honest	0.512	0.446832	0.644638	4.10977	0	0	1	1	1	1	1	1	1	0	1	1	0	0	1	0	0	1	1	1	0	0
491	Honest	-0.0305609	-0.135363	1.0776	17.4945	0	0	1	1	1	1	0	1	1	0	0	1	0	1	0	0	1	1	0	0	0	0
492	Honest	-1.47816	0.146258	0.928247	9.62931	0	0	1	1	1	0	0	0	0	0	0	0	0	0	0	0	0	0	0	0	0	0
493	Honest	0.752434	-0.269911	1.02013	5.00385	0	0	1	1	1	1	1	1	1	1	1	0	1	1	1	1	1	1	0	0	0	0
494	Honest	-1.19251	-0.617461	0.989825	7.96057	0	0	1	0	1	1	1	1	0	0	0	0	0	0	0	0	0	0	0	0	0	0
495	Honest	-0.740565	0.576877	0.381292	9.61652	0	0	1	1	1	1	0	0	0	1	1	0	1	0	0	0	0	0	0	1	0	0
496	Honest	0.784094	-1.1084	1.247	9.93945	0	0	1	1	0	1	0	1	1	1	1	0	1	0	0	0	1	1	1	0	0	0
497	Honest	1.54566	1.29005	0.0354183	14.1522	0	0	1	1	1	1	1	1	0	1	1	1	0	1	1	1	0	1	0	0	0	1
498	Honest	0.470947	-0.388586	0.538179	14.3734	0	0	1	1	1	1	1	1	1	1	1	0	0	1	0	1	0	0	0	0	0	0
499	Honest	-0.420176	-0.893247	0.828469	17.6246	0	0	1	1	1	0	1	0	1	1	1	1	0	0	0	0	0	1	0	0	0	0
500	Honest	0.777347	0.00501939	0.901269	7.99945	0	0	1	1	1	1	1	1	0	0	1	1	1	0	1	0	1	0	0	0	0	0
501	Honest	-0.218201	-0.216368	1.04206	11.9565	0	0	1	1	1	0	1	0	0	1	0	1	0	0	0	0	1	0	0	1	0	0
502	Honest	0.424507	-0.758444	1.2754	5.54212	0	0	1	1	1	0	1	1	0	1	1	0	1	1	0	0	1	0	1	0	0	0
503	Honest	-1.74287	-1.28569	0.642913	17.4451	0	0	1	1	0	0	0	0	0	0	0	1	0	0	0	0	0	0	0	0	0	0
504	Honest	0.312445	1.40943	0.161853	15.2895	0	0	1	0	1	1	1	0	0	1	0	1	1	0	0	1	0	0	1	1	0	0
505	Honest	2.11484	0.91926	1.35966	22.5774	0	0	1	1	1	0	1	1	1	1	1	1	1	1	0	1	1	1	1	1	1	1
506	Honest	-0.118	1.167	0.35338	13.237	0	0	1	1	1	1	1	1	1	1	1	1	1	1	1	0	1	0	0	0	0	0
507	Honest	-0.203856	-0.711241	0.613586	8.9576	0	0	1	1	0	0	1	0	1	0	0	0	0	0	0	0	0	1	0	1	0	0
508	Honest	-0.532067	-0.144747	1.32575	15.6337	0	0	1	1	1	1	1	1	0	1	0	0	0	0	0	0	0	0	0	0	0	0
509	Honest	1.46867	-0.608493	0.6897	14.1511	0	0	1	1	1	1	1	1	1	1	1	1	1	0	1	1	1	1	1	0	0	1
510	Honest	-0.594401	0.357321	0	14.868	0	0	1	0	1	0	1	1	0	0	0	1	0	0	0	0	0	0	0	0	0	0
511	Honest	0.732415	1.70825	0	11.9215	0	0	1	1	1	1	0	1	1	1	1	1	1	0	0	1	1	1	0	0	0	0
512	Honest	-1.23902	-0.931376	1.20682	7.66132	0	0	0	1	1	0	1	0	1	1	1	0	0	1	0	0	0	0	0	0	0	0
513	Honest	0.319602	-1.56797	0.532301	13.9333	0	0	1	1	1	1	1	1	1	1	1	0	0	0	1	0	0	0	0	0	0	0
514	Honest	0.110782	-1.1592	1.02582	13.9479	0	0	1	1	1	0	1	0	1	1	1	1	1	0	0	1	0	0	0	0	0	0
515	Honest	-0.758406	-0.280655	1.22987	17.4462	0	0	1	1	1	0	1	1	1	0	0	0	0	0	0	0	0	0	0	1	0	0
516	Honest	1.14959	1.06146	0.287002	17.2197	0	0	1	1	1	1	0	1	1	1	1	1	1	0	1	1	0	1	0	1	0	0
517	Honest	-0.40802	1.13087	0.887361	9.02237	0	0	1	1	0	1	1	1	1	1	1	1	1	1	0	0	0	0	0	0	0	0
518	Honest	0.317418	0.238328	0.579286	8.36411	0	0	1	1	1	0	0	1	1	1	1	1	1	0	0	1	0	0	0	0	0	0
519	Honest	1.04067	-2.17013	1.54563	15.81	0	0	1	1	1	1	0	1	1	1	1	1	0	1	0	1	1	0	0	1	0	0
520	Honest	-0.335711	-1.98813	0.889149	7.7701	0	0	1	0	1	1	1	1	1	0	0	0	0	0	0	0	1	0	0	0	0	0
521	Honest	0.650167	0.235639	0.855273	6.28461	0	0	1	1	1	1	1	1	1	1	1	1	1	0	0	1	0	1	1	0	0	0
522	Honest	0.965514	-0.78017	1.82367	10.6562	0	0	1	1	1	1	1	1	0	1	1	0	1	1	1	0	1	0	0	0	1	0
523	Honest	1.84877	-0.824325	0.72895	20.2563	0	0	1	1	1	1	1	1	1	1	1	1	1	0	0	1	1	1	0	1	0	0
524	Honest	-0.713994	1.87419	0	16.6796	0	0	1	0	1	1	0	1	0	1	1	0	0	0	0	0	0	0	0	1	0	0
525	Honest	-0.374789	-1.46647	1.1614	13.5883	0	0	1	1	1	1	0	0	0	1	1	1	0	0	0	1	0	0	0	0	0	0
526	Honest	0.933971	-0.0824486	1.31134	13.4301	0	0	1	1	1	1	1	1	1	1	1	1	1	1	1	1	0	0	1	1	0	0
527	Honest	0.664433	-1.12319	0.348157	11.6107	0	0	1	1	1	1	1	1	1	1	0	1	1	1	1	1	1	0	0	1	0	0
528	Honest	0.579636	0.792381	0.79968	16.3695	0	0	1	1	1	1	1	1	0	1	1	1	1	0	0	1	1	0	0	1	0	0
529	Honest	1.66343	0.443054	0.637198	9.72515	0	0	1	1	1	1	1	1	1	1	1	1	1	1	1	1	0	1	0	1	0	1
530	Honest	0.678445	0.0596843	0.864985	5.85013	0	0	1	1	1	1	0	1	1	1	1	1	0	1	0	1	1	0	0	0	0	1
531	Honest	0.234757	-1.31806	0	10.5912	0	0	1	1	1	1	1	1	1	1	0	0	1	1	1	1	1	0	0	0	0	0
532	Honest	1.06864	0.478279	0	10.3607	0	0	1	1	1	1	1	1	1	1	0	1	1	0	0	0	1	1	1	1	0	0
533	Honest	-1.16178	-0.0267356	0.913788	8.85723	0	0	1	1	0	1	1	1	0	0	1	1	0	0	0	0	0	1	0	0	0	0
534	Honest	-0.519499	0.732411	0	18.2972	0	0	1	1	1	1	1	0	1	0	1	0	1	0	0	0	0	0	1	0	1	0
535	Honest	-1.9627	-1.0282	1.35823	5.38556	0	0	1	0	0	1	1	0	0	0	0	0	0	0	0	0	0	0	0	0	0	0
536	Honest	0.742472	1.0314	0.911258	13.2123	0	0	1	1	1	1	1	1	0	1	1	0	1	1	0	0	0	0	0	0	0	0
537	Honest	-1.6388	-0.660762	1.82029	10.0739	0	0	1	1	0	0	0	1	1	0	1	0	0	0	0	0	0	0	0	0	0	0
538	Honest	-0.497823	1.03438	0.327823	12.2583	0	0	1	1	0	0	1	1	1	1	0	1	1	0	0	0	0	0	0	0	0	0
539	Honest	-1.10999	-0.555347	0.971206	10.042	0	0	0	0	1	1	1	1	0	1	1	0	0	0	0	0	0	0	0	0	0	0
540	Honest	0.372436	1.54862	0.334023	13.213	0	0	1	1	1	0	1	1	1	1	0	0	1	0	0	0	0	0	0	0	0	1
541	Honest	0.682584	-1.48956	1.8172	6.80815	0	0	1	1	1	1	1	1	1	1	1	0	1	0	0	0	0	1	0	0	0	0
542	Honest	-0.384713	-2.74217	1.00187	12.4822	0	0	1	1	1	1	0	0	0	0	1	0	1	0	0	0	0	0	0	0	0	0
543	Honest	-1.91623	-0.991726	0.489178	8.67205	0	0	0	1	0	0	1	0	1	0	0	0	0	0	0	0	0	0	0	0	0	0
544	Honest	0.815	0.866878	1.12612	11.4012	0	0	1	1	1	1	1	1	1	1	1	1	1	0	1	0	1	0	0	0	0	0
545	Honest	0.141715	-0.000624021	1.53126	10.502	0	0	1	1	1	1	1	1	1	1	0	1	1	0	0	1	0	0	0	1	0	0
546	Honest	1.19801	1.93718	1.47889	6.8584	0	0	1	1	1	0	1	1	1	1	1	1	1	0	1	0	1	1	0	1	0	0
547	Honest	1.20626	0.61396	0.486448	14.5342	0	0	1	1	1	1	1	1	0	1	1	1	1	1	1	1	1	1	0	0	1	0
548	Honest	-0.433191	-0.611456	0.707786	14.3596	0	0	1	1	1	1	1	0	0	1	1	0	1	0	0	0	0	0	0	1	0	0
549	Honest	-1.27232	-1.12517	1.24292	14.5841	0	0	1	1	1	0	1	0	0	0	0	0	0	0	0	0	1	0	0	0	0	0
550	Honest	1.58323	-1.2832	0	18.849	0	0	1	1	1	1	1	1	1	1	1	0	1	1	0	0	1	1	1	0	0	0
551	Honest	-0.0936971	0.210523	0.290711	11.6537	0	0	1	1	1	1	0	1	0	1	0	0	1	0	0	0	1	0	0	0	0	0
552	Honest	-1.1806	1.06644	0.639317	12.3817	0	0	1	0	0	0	1	1	1	0	0	0	0	1	0	0	0	0	0	0	0	0
553	Honest	-0.560804	-0.864415	0.911056	16.8659	0	0	1	1	1	1	1	1	1	0	0	0	0	0	0	0	0	0	0	0	0	0
554	Honest	-0.402251	-0.573249	1.42315	12.0738	0	0	0	1	1	0	1	1	0	0	1	0	1	0	1	0	0	0	0	1	0	0
555	Honest	0.300786	0.433525	0.939558	15.447	0	0	1	1	1	1	1	1	0	1	1	1	0	0	0	0	0	0	0	1	0	0
556	Honest	-0.443543	0.265406	0.275452	12.2259	0	0	1	1	1	1	1	1	1	0	1	0	0	0	0	0	0	0	0	1	0	0
557	Honest	-1.28147	-1.98081	1.89867	13.4959	0	0	1	0	0	1	0	0	0	0	0	1	0	0	0	0	0	0	0	0	0	0
558	Honest	1.05327	-0.286885	0.878062	11.6637	0	0	1	1	1	1	1	1	1	1	1	1	1	1	1	0	0	1	1	0	0	0
559	Honest	-0.229439	0.0670173	0.813199	14.9995	0	0	1	1	0	1	1	1	0	0	1	0	0	1	1	0	0	0	0	1	0	0
560	Honest	1.12071	-1.45684	0.729906	19.5413	0	0	1	1	1	1	1	1	1	1	1	1	1	1	1	1	1	0	0	0	0	0
561	Honest	0.186303	0.7813	1.3984	15.4778	0	0	1	0	1	1	1	1	1	0	1	0	1	1	0	0	0	0	1	0	1	0
562	Honest	-0.673787	-0.505413	1.01772	12.8299	0	0	1	0	1	0	1	0	1	1	1	1	0	0	0	0	0	0	0	1	0	0
563	Honest	-1.76141	-1.32078	0.446401	8.4449	0	0	1	0	0	0	1	1	0	0	0	0	0	0	0	0	0	0	0	0	0	0
564	Honest	-0.154268	-0.760194	0.645006	8.29358	0	0	1	1	1	0	0	0	1	1	1	0	1	0	0	1	0	0	0	0	0	0
565	Honest	0.227861	0.529901	1.41571	11.7123	0	0	1	1	1	1	1	1	0	1	1	1	0	1	1	0	0	0	0	1	0	0
566	Honest	0.540572	-0.1015	0.334243	10.9327	0	0	1	0	1	1	1	1	1	1	1	1	1	1	1	1	0	0	0	0	0	0
567	Honest	-0.772038	1.18866	0.319309	13.9894	0	0	1	1	0	1	1	0	0	0	0	0	0	0	1	1	0	0	0	0	0	0
568	Honest	-1.20606	-0.250103	1.38796	8.94534	0	0	1	1	1	1	1	0	1	0	0	0	0	0	0	0	0	0	0	0	0	0
569	Honest	0.964399	-0.240261	1.3521	7.13592	0	0	1	1	1	1	1	1	1	1	1	1	0	1	1	0	0	1	0	0	0	0
570	Honest	-1.40073	0.143832	1.0537	19.8857	0	0	0	0	1	1	1	0	0	1	1	0	0	0	0	0	0	0	0	0	0	0
571	Honest	-0.399332	0.0309775	1.5884	12.9135	0	0	1	1	1	1	0	1	1	0	0	0	1	1	0	1	0	0	0	0	0	0
572	Honest	-0.0346045	0.494755	1.36435	16.6047	0	0	1	0	1	1	1	1	0	0	0	0	1	0	1	1	1	0	1	0	0	0
573	Honest	-0.22291	0.893562	1.1133	12.495	0	0	1	1	0	0	0	1	0	1	1	1	0	1	0	0	1	0	0	0	0	0
574	Honest	-0.390075	0.924951	1.37726	9.59909	0	0	1	1	1	1	1	1	0	1	1	0	1	1	0	0	0	0	0	0	0	0
575	Honest	-0.763183	0.554621	0.880998	13.2877	0	0	0	1	1	1	1	0	0	1	0	0	0	0	0	0	0	0	0	0	0	0
576	Honest	-0.702166	0.718991	0.725059	21.2045	0	0	1	1	1	1	1	0	1	1	1	1	0	0	0	0	0	0	0	0	0	0
577	Honest	1.28327	1.34389	0	16.8216	0	0	1	1	1	1	1	1	1	1	0	0	1	1	0	1	0	1	1	0	1	0
578	Honest	-1.07216	1.49241	1.03015	15.201	0	0	1	0	1	1	0	0	1	0	1	1	0	0	0	0	0	0	0	0	0	0
579	Honest	-1.16625	0.533861	0.678905	16.614	0	0	1	1	1	0	1	0	1	0	0	0	0	0	0	0	0	0	0	0	0	0
580	Honest	-0.922146	0.672981	0.50638	8.87255	0	0	1	1	0	0	1	0	0	1	0	0	0	0	0	0	0	0	0	0	0	0
581	Honest	-0.514166	-1.80237	0.610141	10.625	0	0	1	1	1	0	1	1	1	1	0	0	0	0	0	0	0	0	1	0	0	0
582	Honest	-1.23733	0.458064	0.987407	14.5855	0	0	1	1	1	1	0	0	1	1	0	0	0	0	0	0	0	0	0	0	0	0
583	Honest	2.25459	1.06168	0	11.7862	0	0	1	1	1	1	1	1	1	1	1	1	1	1	1	1	1	1	1	0	1	1
584	Honest	1.36208	1.58405	0.860404	16.7025	0	0	1	1	1	1	1	0	1	1	1	1	1	1	1	1	0	1	0	1	0	0
585	Honest	-0.513258	-1.35958	1.34305	8.30162	0	0	1	1	1	1	1	0	0	0	0	0	0	0	0	0	0	0	0	0	0	0
586	Honest	0.635482	-0.208405	2.08403	12.931	0	0	1	1	1	0	0	1	1	1	0	0	1	0	1	0	1	1	0	0	0	0
587	Honest	1.36526	0.063409	1.37862	18.432	0	0	1	1	1	1	1	1	1	1	0	1	1	1	1	1	0	1	0	0	0	0
588	Honest	-0.194262	-0.175138	0.978006	15.5663	0	0	1	1	1	1	0	1	1	1	0	0	0	1	0	0	0	0	0	0	0	0
589	Honest	2.51556	-0.678693	1.08838	17.5897	0	0	1	0	1	1	1	1	1	1	1	1	1	1	1	1	1	1	0	0	0	1
590	Honest	0.505684	0.199069	1.65031	3.5411	0	0	1	1	1	1	0	1	1	1	1	0	0	1	1	0	0	0	0	1	0	0
591	Honest	-0.517504	-0.647387	0.566367	10.9387	0	0	1	1	1	1	1	1	1	1	1	0	1	0	0	0	0	0	0	0	0	0
592	Honest	-0.156784	-0.91981	2.32272	7.98913	0	0	1	0	1	0	0	1	1	0	0	1	0	0	0	0	0	0	0	0	0	0
593	Honest	-1.58137	-1.44765	1.70607	15.4196	0	0	1	1	0	1	0	0	0	0	1	0	0	0	0	0	0	0	0	0	1	0
594	Honest	0.329492	-1.201	1.28354	13.0642	0	0	1	0	1	0	0	1	1	1	1	0	1	1	1	0	0	0	1	1	0	0
595	Honest	-1.37535	1.01857	1.78824	10.5334	0	0	1	1	0	0	0	0	0	0	0	0	0	0	0	0	0	0	1	0	0	0
596	Honest	-0.20712	-0.309254	0.641659	8.96821	0	0	1	1	1	1	0	1	1	1	1	0	1	0	0	1	0	0	0	0	0	0
597	Honest	0.549418	-1.16952	1.38595	15.9344	0	0	1	1	1	1	1	0	1	1	1	1	1	0	1	1	0	1	0	0	0	0
598	Honest	0.836751	-0.293592	1.49914	9.24954	0	0	1	1	1	1	1	1	1	1	1	1	1	1	1	0	0	0	0	0	0	0
599	Honest	-1.32568	-1.43195	1.8957	5.86172	0	0	1	1	0	1	0	1	0	1	0	0	0	0	0	0	0	0	0	0	0	0
600	Honest	1.44034	-0.667007	0	8.77111	0	0	1	1	1	1	1	1	1	1	1	0	1	0	1	1	1	1	0	0	0	0
601	Honest	0.533365	0.629907	1.14514	15.4622	0	0	1	1	1	1	1	1	0	0	1	0	1	0	1	0	1	0	0	0	0	0
602	Honest	-0.512743	-0.722838	0.308548	19.4093	0	0	0	1	1	0	0	1	1	0	1	0	0	0	0	1	0	0	0	0	0	0
603	Honest	-0.448004	-0.372807	1.75666	9.07784	0	0	1	0	1	1	0	0	1	1	0	0	0	1	1	0	0	0	0	0	0	0
604	Honest	0.972036	-0.352618	0.225008	13.2722	0	0	1	1	1	1	1	1	1	1	1	1	1	1	1	0	0	0	0	0	1	1
605	Honest	-0.392099	-1.25595	0.935487	9.242	0	0	0	1	1	0	0	1	0	0	1	0	1	1	0	0	0	0	0	0	0	0
606	Honest	-1.84456	0.263997	1.4836	9.49247	0	0	1	0	0	0	1	1	0	0	0	0	0	0	0	0	0	0	0	0	0	0
607	Honest	-1.13473	-0.555456	0.358295	14.7072	0	0	1	1	0	0	1	0	0	0	0	0	0	0	0	0	1	0	0	0	0	0
608	Honest	0.363429	-0.21622	0.440064	11.2707	0	0	1	1	1	0	1	1	0	1	1	1	0	0	0	1	0	1	0	0	0	0
609	Honest	-1.30348	-0.940977	0.984336	1.07711	0	0	1	1	1	0	0	1	1	0	0	0	0	0	0	0	0	0	0	0	0	0
610	Honest	-0.20252	-3.33659	2.02316	13.6575	0	0	1	0	1	1	0	0	1	0	1	1	0	1	0	1	0	0	0	0	0	0
611	Honest	-3.17855	-1.47714	1.29652	11.0351	0	0	1	1	0	0	1	0	1	0	0	0	0	0	0	0	0	0	0	0	0	0
612	Honest	0.571509	0.252577	0.343494	10.8437	0	0	1	1	1	1	1	1	1	1	0	1	1	1	0	1	1	0	0	0	1	0
613	Honest	2.05141	1.47177	1.45605	9.50502	0	0	1	1	1	1	1	1	1	1	1	1	1	1	1	1	1	1	1	0	0	0
614	Honest	0.903775	1.10286	0.588255	13.679	0	0	1	0	1	1	1	1	1	1	1	0	1	0	1	0	0	0	1	0	0	0
615	Honest	0.615645	0.606061	0	11.2487	0	0	1	1	1	1	1	1	0	1	0	0	0	0	1	1	0	0	1	0	1	0
616	Honest	-1.22358	0.20448	0.942158	16.339	0	0	1	1	1	0	1	1	0	0	0	0	0	0	0	0	0	0	0	0	0	0
617	Honest	1.04201	0.180695	0.467224	10.1286	0	0	1	1	1	1	1	1	1	1	1	1	1	0	1	1	1	0	1	1	0	0
618	Honest	0.347228	2.76381	0.184337	13.2893	0	0	1	1	1	1	1	1	1	1	1	1	1	0	1	1	1	1	0	0	0	0
619	Honest	1.0058	-0.0543966	0.461301	17.6734	0	0	1	1	1	0	0	1	1	1	0	0	1	1	1	1	0	0	1	1	1	0
620	Honest	-1.72178	-2.04648	1.44096	14.4741	0	0	1	1	0	0	1	0	0	0	0	0	0	0	0	0	0	0	0	0	0	0
621	Honest	-1.12075	0.111228	1.0326	3.64548	0	0	1	1	1	0	1	0	1	1	0	1	0	0	0	0	0	0	0	0	0	0
622	Honest	0.999274	0.378913	0.313021	12.5166	0	0	1	1	1	1	1	1	1	1	1	1	1	0	1	1	1	1	1	0	0	0
623	Honest	0.991519	1.60064	0.829429	10.7492	0	0	1	0	1	0	1	1	1	1	0	1	1	1	0	1	1	0	0	1	1	0
624	Honest	-0.071004	-0.135384	1.35536	11.268	0	0	1	1	1	0	1	1	0	1	1	1	1	0	0	1	0	0	1	1	0	0
625	Honest	-1.38557	-0.13548	0.610215	13.8223	0	0	1	0	0	1	0	1	0	0	0	0	0	0	0	0	0	0	0	0	0	0
626	Honest	0.126487	2.05165	0	17.6362	0	0	1	1	1	1	1	1	1	0	0	1	0	1	1	0	0	0	1	0	0	0
627	Honest	0.364031	0.199838	1.10123	11.6383	0	0	1	1	1	1	1	1	1	1	0	0	1	1	0	0	0	0	0	0	0	1
628	Honest	-1.60339	-0.443875	0.733779	9.97481	0	0	1	0	1	1	0	1	0	1	0	0	0	0	0	0	0	0	0	0	0	0
629	Honest	0.771072	0.646607	0.649862	18.3277	0	0	1	1	1	1	1	1	1	1	1	0	1	1	0	0	0	0	0	0	0	0
630	Honest	0.235035	-1.24801	1.7184	1.21075	0	0	1	1	1	1	1	1	1	1	0	0	1	1	0	0	0	0	1	0	0	0
631	Honest	-0.625115	1.55056	1.37192	15.0469	0	0	1	1	1	1	1	1	1	1	1	1	0	1	0	0	0	0	0	0	0	0
632	Honest	1.51369	0.981811	0.47573	16.1252	0	0	1	1	1	1	1	1	1	1	1	1	1	1	1	1	0	1	0	1	0	0
633	Honest	-0.256518	0.709408	0.364509	13.8487	0	0	1	1	1	1	1	1	1	1	0	0	1	0	1	0	0	0	0	0	0	1
634	Honest	-0.971004	-0.80977	0.347639	12.3219	0	0	1	1	0	0	0	0	1	0	0	0	0	0	0	0	0	0	0	0	0	0
635	Honest	-0.821716	0.21482	0.928031	13.9203	0	0	1	0	1	1	1	1	1	0	0	0	1	1	0	0	0	0	0	0	0	0
636	Honest	-0.930888	-0.5122	0.670633	17.2872	0	0	0	0	0	0	0	0	1	0	0	0	0	0	0	0	0	0	0	0	0	0
637	Honest	0.486568	0.894643	0.0350288	12.7613	0	0	1	0	1	1	1	1	1	1	0	0	1	1	1	1	1	0	0	1	0	0
638	Honest	-0.131534	-0.448257	0.577191	18.0318	0	0	1	1	0	1	0	1	1	1	0	1	0	1	1	0	1	1	0	0	0	0
639	Honest	0.190399	2.27913	0	13.9265	0	0	1	1	1	0	1	1	1	1	1	1	0	1	1	0	0	1	0	0	0	0
640	Honest	-1.11929	1.12205	0.544264	11.591	0	0	1	0	0	1	1	1	0	0	0	1	0	0	0	0	0	0	0	0	0	0
641	Honest	-1.35612	-0.885606	0.436517	13.3981	0	0	0	1	0	0	1	1	0	1	0	0	0	0	0	0	0	0	0	1	0	0
642	Honest	0.728216	-1.08294	1.5027	9.2686	0	0	1	1	1	0	1	1	1	1	1	0	1	1	1	1	0	0	1	0	0	0
643	Honest	2.65773	-0.35109	1.13596	13.9446	0	0	1	1	1	1	1	1	1	1	1	1	1	1	1	1	1	1	0	1	1	1
644	Honest	0.0470513	1.45191	0.870521	23.2387	0	0	1	1	1	1	1	1	0	1	0	1	0	1	0	0	0	0	0	1	0	0
645	Honest	0.589616	-0.374805	0.66407	14.8793	0	0	1	1	1	1	1	0	1	1	0	1	1	1	0	0	0	0	0	1	0	0
646	Honest	-1.29532	-0.106463	0	13.1346	0	0	1	0	1	1	1	0	1	1	1	1	1	0	0	0	0	0	0	0	0	0
647	Honest	0.367045	0.891976	1.48546	11.2235	0	0	1	1	1	0	0	1	0	0	1	1	1	1	0	1	0	0	0	1	0	0
648	Honest	0.795295	-0.705977	1.18946	12.3761	0	0	1	1	1	1	1	1	1	1	0	1	0	0	1	1	1	0	1	0	0	0
649	Honest	-0.204484	-0.149181	0.289549	9.49335	0	0	1	1	1	0	1	0	1	1	0	0	0	1	1	0	0	0	0	0	0	0
650	Honest	-1.1726	1.41015	0.688037	11.0104	0	0	0	1	0	0	0	0	0	0	0	0	0	0	0	0	0	0	0	0	0	0
651	Honest	0.254246	0.585546	1.14707	11.7532	0	0	1	0	1	0	1	1	1	1	1	1	0	0	0	1	0	1	0	0	0	0
652	Honest	-1.24039	-1.80518	0.492878	17.6525	0	0	0	1	0	1	1	1	0	0	0	0	0	0	0	0	0	0	0	0	0	0
653	Honest	0.287843	0.0305771	0.625417	9.82078	0	0	1	1	1	0	1	1	1	1	1	1	0	0	0	0	0	0	1	0	1	0
654	Honest	-0.361801	0.0155958	1.81257	12.0149	0	0	1	1	1	1	1	1	1	0	1	1	0	1	0	0	0	0	0	0	0	0
655	Honest	1.37519	2.0438	0.154756	12.6466	0	0	0	1	1	1	1	1	1	1	1	1	1	1	1	0	1	0	1	0	0	0
656	Honest	-0.45012	-0.734305	0.701475	7.25168	0	0	1	1	1	1	1	1	0	0	1	1	0	0	1	0	0	0	0	0	0	0
657	Honest	2.49724	0.0824552	1.37793	16.3712	0	0	1	1	1	1	0	1	1	1	1	1	1	1	1	0	1	1	1	1	0	1
658	Honest	1.07773	-0.177731	0.537793	16.9323	0	0	1	1	1	1	1	1	1	1	0	1	1	1	1	1	0	0	0	1	0	0
659	Honest	-1.3988	-0.215895	0.260203	16.1292	0	0	0	0	0	0	1	0	0	0	0	0	0	0	0	0	0	0	0	0	0	0
660	Honest	-0.0056565	-0.317879	2.09952	19.908	0	0	1	1	1	1	0	1	0	1	1	0	0	1	0	0	1	0	0	0	0	0
661	Honest	-0.0196118	-0.263976	1.20678	10.2852	0	0	1	0	1	1	0	1	0	1	1	1	0	0	0	0	0	1	1	0	0	0
662	Honest	0.79188	0.338497	0.571489	11.4321	0	0	1	1	1	1	1	1	1	1	1	1	1	1	1	1	1	0	0	0	0	0
663	Honest	1.94356	1.66355	0.667322	11.5376	0	0	1	1	1	1	1	1	1	1	1	1	1	1	1	1	1	1	0	1	1	0
664	Honest	0.092853	0.228967	0	14.0024	0	0	1	0	1	1	1	1	1	1	0	1	1	0	1	0	0	0	1	0	0	0
665	Honest	-1.00849	-1.47054	0.572797	9.69019	0	0	1	0	1	0	1	0	0	0	1	1	0	1	0	0	0	0	0	0	0	0
666	Honest	1.05526	-0.391989	0	15.1167	0	0	1	1	1	0	1	1	1	1	0	1	1	1	0	0	0	0	1	1	1	0
667	Honest	-0.422672	-0.483129	0.667517	16.3795	0	0	1	1	0	1	1	0	0	0	1	0	0	1	0	0	0	0	0	0	0	0
668	Honest	0.261651	-0.00331854	0.613168	15.0094	0	0	1	1	1	1	1	1	1	1	1	0	1	0	1	0	1	1	0	1	0	0
669	Honest	0.542702	0.557151	1.40506	0.5	0	0	1	1	1	1	1	1	1	1	1	1	1	0	0	0	0	0	1	1	0	0
670	Honest	-0.378883	0.2492	0.0538129	16.3948	0	0	1	1	1	1	0	0	0	1	0	0	0	0	0	0	0	0	1	0	0	0
671	Honest	0.260581	-1.12005	0.184302	23.5914	0	0	1	1	1	0	1	1	1	1	1	1	0	1	1	0	1	0	0	0	0	0
672	Honest	0.199094	-0.905153	1.01151	6.23488	0	0	1	1	1	1	1	1	1	0	1	0	0	1	0	0	0	0	0	1	0	1
673	Honest	2.30423	0.234932	0.98615	19.4907	0	0	1	1	1	1	1	1	1	1	1	1	1	1	1	1	1	1	0	0	1	0
674	Honest	-0.618727	-0.609866	1.12705	12.674	0	0	1	0	1	1	1	1	1	1	1	0	0	0	0	0	0	0	0	0	0	0
675	Honest	1.3512	1.13247	0	15.8087	0	0	1	1	1	1	1	1	1	1	1	0	1	1	1	1	1	0	1	0	0	1
676	Honest	-0.710297	0.266424	1.50826	9.87714	0	0	1	1	0	0	0	1	0	0	0	0	0	0	0	1	0	0	0	0	0	0
677	Honest	0.794921	0.305272	0.525649	8.81023	0	0	1	1	1	1	1	1	1	1	1	0	1	1	1	1	0	0	0	0	0	0
678	Honest	-0.149321	-0.337607	1.03568	11.552	0	0	1	1	1	0	1	0	1	1	1	1	0	0	0	0	0	0	0	0	0	0
679	Honest	-0.328985	-0.15199	0.121282	20.3308	0	0	1	1	1	1	1	1	0	1	0	0	0	0	1	0	0	0	0	1	0	0
680	Honest	0.650474	0.557308	1.70716	9.52592	0	0	1	1	1	1	1	1	1	1	1	1	1	0	1	0	0	0	1	0	0	0
681	Honest	-0.364917	-0.408627	0.849102	13.2568	0	0	1	1	1	1	0	1	1	0	1	0	0	0	1	0	1	1	1	0	0	0
682	Honest	0.799313	-0.493777	1.46227	10.6809	0	0	1	1	1	1	1	1	1	1	0	1	1	1	0	0	1	0	1	0	0	0
683	Honest	-0.803862	0.345665	1.17319	21.0764	0	0	1	1	0	1	0	0	0	1	0	0	1	0	0	0	0	0	0	0	0	0
684	Honest	1.74649	0.123769	1.24889	12.0103	0	0	1	1	1	1	1	1	1	1	1	0	1	1	1	1	1	1	1	1	1	0
685	Honest	1.79515	-0.382072	1.24319	14.0664	0	0	1	1	1	1	1	1	0	1	1	1	1	1	1	0	1	1	1	1	0	0
686	Honest	-0.567992	-1.24825	0.221767	12.8554	0	0	1	0	1	1	1	0	1	0	0	0	0	0	0	0	0	0	0	0	0	0
687	Honest	-0.557274	-1.58275	0.683789	13.4885	0	0	1	1	1	0	1	1	1	1	0	0	0	0	1	0	0	0	1	0	0	0
688	Honest	-0.629941	-0.594964	0.999794	13.2411	0	0	1	0	1	1	1	0	0	0	0	0	0	0	0	0	0	0	1	0	0	0
689	Honest	0.158858	1.80804	1.21855	12.6752	0	0	1	1	1	0	0	0	0	1	1	1	0	0	1	0	1	0	0	0	0	0
690	Honest	-1.29032	-1.23104	1.42634	15.3457	0	0	1	0	0	1	0	1	0	0	0	0	1	0	0	0	0	0	0	0	0	0
691	Honest	-0.497276	1.38284	0.018326	13.8695	0	0	1	1	1	1	1	1	1	0	0	1	0	0	0	0	0	0	0	0	0	0
692	Honest	-1.07749	-0.397827	1.32088	9.18208	0	0	1	1	1	1	0	1	0	0	0	0	0	0	0	0	0	0	0	0	0	0
693	Honest	-2.06548	0.0408059	0.172125	11.6306	0	0	1	1	0	1	0	0	0	0	0	0	0	1	0	0	0	0	0	0	0	0
694	Honest	-0.521794	-2.44999	1.97623	13.5101	0	0	1	1	1	1	0	1	1	1	1	0	0	1	1	0	0	0	0	0	0	0
695	Honest	-1.03999	-1.54991	0.306349	7.86433	0	0	0	1	1	0	1	0	0	0	1	0	0	0	1	0	0	0	0	0	0	0
696	Honest	0.541697	-0.740091	0	18.2078	0	0	1	1	1	1	0	0	1	0	1	1	0	1	1	1	0	0	0	0	1	0
697	Honest	-0.776743	-0.496619	0	13.3957	0	0	1	0	0	1	0	0	1	0	0	0	1	0	0	0	0	0	0	0	0	0
698	Honest	0.282718	1.05648	0.838194	9.6856	0	0	1	1	1	0	1	1	1	0	0	0	0	1	0	0	0	0	0	0	0	0
699	Honest	0.55188	-1.71514	2.07159	18.5296	0	0	1	1	1	1	1	1	1	1	1	1	1	1	1	0	0	1	1	0	0	0
700	Honest	0.137493	0.259278	0.455842	9.59035	0	0	1	1	1	1	1	1	1	0	0	1	0	0	0	0	0	0	1	0	0	0
701	Honest	-2.02677	0.979815	1.70002	12.9134	0	0	1	0	1	0	1	1	0	0	0	0	0	0	0	0	0	0	0	0	0	0
702	Honest	0.850949	-0.567467	1.46057	13.105	0	0	1	1	1	1	1	1	1	1	1	1	0	1	1	1	0	1	1	1	0	0
703	Honest	0.857149	0.578279	0.585223	11.8048	0	0	1	1	1	1	0	1	1	1	1	1	1	1	1	0	0	0	1	0	0	0
704	Honest	1.35778	-0.386323	1.24205	10.9787	0	0	1	1	1	1	1	0	1	1	1	1	1	0	0	1	1	1	0	0	0	0
705	Honest	0.0401893	-0.199281	1.5959	12.2176	0	0	1	0	1	1	1	1	1	1	1	0	1	1	0	0	0	0	0	0	0	0
706	Honest	-2.29871	-0.973191	1.01824	8.52852	0	0	0	0	0	0	1	0	0	0	0	0	0	0	0	0	0	0	0	0	0	0
707	Honest	0.651695	-2.50568	0.63873	11.6419	0	0	1	1	1	0	1	1	0	1	0	0	1	0	1	1	1	0	0	0	0	0
708	Honest	0.949332	1.05231	1.04903	9.05505	0	0	1	1	1	1	0	1	1	1	0	1	1	0	0	0	0	0	1	0	0	0
709	Honest	-0.723684	1.20865	0	17.0044	0	0	0	1	0	1	0	0	1	1	0	0	0	1	0	1	0	0	0	0	0	0
710	Honest	0.731001	-0.923453	1.63758	10.6719	0	0	1	1	1	1	1	1	1	0	1	1	1	1	0	0	1	0	0	0	0	0
711	Honest	1.86844	0.388762	1.17809	17.0218	0	0	1	1	1	0	1	1	1	1	1	0	1	1	1	1	1	1	1	1	1	0
712	Honest	0.75053	-0.0768203	0.685537	18.0266	0	0	1	1	1	0	1	1	1	1	0	0	1	1	1	0	0	1	0	0	0	0
713	Honest	-1.52681	0.103325	1.5663	8.35713	0	0	1	0	1	1	1	1	0	0	1	0	0	1	0	0	0	0	0	0	0	0
714	Honest	1.21062	0.754693	0.778479	17.3016	0	0	1	1	1	1	1	1	0	1	1	1	1	0	1	0	1	1	1	1	0	0
715	Honest	1.24371	-1.23197	0.912267	13.8334	0	0	1	1	1	1	1	1	1	1	0	1	1	1	1	1	0	1	0	0	1	0
716	Honest	0.375438	0.276298	0.799023	10.8609	0	0	1	1	1	1	1	0	1	1	1	1	0	1	0	0	0	0	0	0	0	0
717	Honest	-1.54975	0.0538398	0.947185	6.5675	0	0	1	1	1	0	0	0	0	0	1	1	0	0	0	0	0	0	0	0	0	0
718	Honest	0.117518	0.358257	0.816721	11.9337	0	0	1	1	1	1	0	1	0	1	0	0	1	1	1	0	0	0	0	0	0	0
719	Honest	1.45052	-0.60848	0.376767	15.7853	0	0	1	1	1	1	1	1	1	1	0	1	1	1	1	1	0	1	0	1	0	0
720	Honest	-0.985087	1.04955	0	20.4287	0	0	0	1	0	1	0	1	0	0	1	0	0	0	0	0	0	0	0	0	0	0
721	Honest	0.444594	0.651994	0.346487	22.0505	0	0	1	1	1	1	0	1	0	1	1	0	1	1	0	0	0	0	0	0	0	0
722	Honest	-0.246647	-2.10683	1.29611	14.6451	0	0	1	1	1	1	0	0	0	0	1	0	0	0	1	0	1	0	0	0	0	0
723	Honest	0.00695751	0.398373	0.689775	13.6568	0	0	1	1	1	1	0	1	1	0	0	1	0	1	0	0	1	0	0	0	1	0
724	Honest	-1.77912	-0.648082	2.07081	3.19253	0	0	0	0	0	1	1	0	0	0	0	0	0	0	0	0	0	0	0	0	0	0
725	Honest	1.15635	-1.53612	0.263129	13.3527	0	0	1	1	1	1	1	1	1	1	1	1	1	1	1	0	0	0	0	0	1	0
726	Honest	-0.243529	1.45766	0.637525	14.4604	0	0	1	0	1	0	1	1	1	1	0	0	0	0	0	0	0	0	0	0	0	0
727	Honest	-1.16961	-0.450958	0.58662	13.5461	0	0	1	0	0	0	1	0	0	0	0	0	0	0	0	0	0	0	0	0	0	0
728	Honest	1.13912	0.344718	0	13.2171	0	0	1	1	1	1	1	1	1	1	0	1	1	0	0	1	0	0	1	1	0	0
729	Honest	-1.12223	0.870951	0.579856	19.7639	0	0	1	1	1	0	0	1	1	1	0	0	0	0	0	0	0	0	0	0	0	0
730	Honest	-0.570464	-0.130201	0.128119	12.5667	0	0	1	1	1	0	1	0	1	0	0	0	0	0	0	0	0	0	0	0	0	0
731	Honest	0.760656	1.2697	0.651019	18.5484	0	0	1	1	1	1	1	1	1	0	1	1	1	1	1	1	1	0	0	1	1	0
732	Honest	0.307379	0.632553	1.51996	9.02443	0	0	1	1	1	1	1	1	1	1	1	1	1	0	1	1	1	0	0	1	0	0
733	Honest	-0.817091	-0.0840113	1.06247	16.4736	0	0	1	0	1	1	1	0	0	0	0	0	1	0	0	0	1	0	0	1	0	0
734	Honest	0.851184	-1.13813	0.318745	25.1646	0	0	1	1	1	1	1	1	0	1	1	0	0	0	1	1	0	1	1	0	0	0
735	Honest	0.795863	1.42304	0.517337	8.96991	0	0	1	0	1	1	1	1	1	1	1	1	1	1	1	1	0	1	0	1	0	0
736	Honest	0.135507	0.780245	1.91376	15.0543	0	0	1	1	1	0	0	0	0	0	1	0	0	1	0	0	0	0	0	0	0	0
737	Honest	-0.0480128	-1.44922	1.3437	13.4811	0	0	1	0	1	1	0	1	0	1	1	1	1	0	0	0	0	0	1	1	0	0
738	Honest	-0.0471412	0.462059	1.18428	9.44268	0	0	1	1	0	1	0	1	1	1	0	1	0	0	0	1	0	0	1	0	0	0
739	Honest	-1.33384	-0.450302	1.53983	10.196	0	0	1	0	1	1	0	0	0	0	0	0	0	1	0	0	0	0	0	0	0	0
740	Honest	-2.41069	-1.04066	0.148283	11.4015	0	0	1	0	0	0	0	0	0	1	1	0	0	0	0	0	0	0	0	0	0	0
741	Honest	0.512616	-0.0600665	1.02576	12.2034	0	0	1	1	1	1	1	1	1	1	1	1	1	1	0	0	1	1	1	1	0	0
742	Honest	0.0551643	-0.624749	1.46356	10.1722	0	0	1	1	1	1	1	1	1	1	0	1	0	1	1	1	0	1	1	0	0	0
743	Honest	0.325492	-1.1293	2.00288	12.4908	0	0	1	1	1	1	1	1	1	1	1	1	1	1	1	0	1	0	0	0	0	0
744	Honest	-1.03961	-0.0150519	0.621865	13.6204	0	0	0	0	1	0	1	0	0	0	0	0	0	0	0	0	0	0	0	0	0	0
745	Honest	-1.60075	-0.155944	0	18.1855	0	0	1	0	0	0	1	0	0	1	0	0	0	0	0	0	0	0	0	0	0	0
746	Honest	-0.0403814	0.38023	0.0308014	15.8672	0	0	1	1	1	1	0	1	1	0	1	0	0	0	1	1	0	0	0	1	0	0
747	Honest	-0.636484	0.562076	0.135792	17.5001	0	0	0	0	1	0	1	1	0	1	1	1	0	0	0	0	0	0	0	0	0	0
748	Honest	2.63489	-1.73573	1.46199	12.2871	0	0	1	1	1	1	1	1	1	1	0	1	1	0	1	1	1	1	1	1	1	0
749	Honest	-0.462997	0.390492	0.628579	10.3595	0	0	1	1	0	1	1	0	1	1	1	1	1	0	0	0	0	0	0	0	0	0
750	Honest	-0.793959	-0.616031	0.842612	9.67462	0	0	0	1	1	1	1	1	0	1	0	0	0	0	0	0	0	0	1	0	0	0
751	Honest	-0.787753	1.50855	0.536851	8.31506	0	0	1	0	0	0	0	1	0	0	0	0	0	0	0	0	0	0	0	0	0	0
752	Honest	-0.0664025	-0.521346	2.06547	6.71498	0	0	1	0	1	1	1	1	1	1	1	0	0	1	0	0	0	1	0	0	0	0
753	Honest	-0.66001	1.0393	0.251415	12.736	0	0	1	0	1	1	0	1	0	0	0	0	0	0	0	0	1	0	0	1	0	0
754	Honest	1.08942	1.34172	1.07447	7.74705	0	0	1	1	1	1	0	1	1	1	1	1	1	1	1	1	1	1	0	0	1	1
755	Honest	-0.623808	-0.468265	1.36043	8.25841	0	0	1	1	1	1	1	1	1	0	1	0	1	0	0	0	0	0	0	0	0	0
756	Honest	-0.0386183	1.45361	0	13.7623	0	0	1	1	0	1	1	1	1	0	0	1	0	0	0	0	0	0	0	0	0	0
757	Honest	-2.05093	-0.0750552	0	20.4312	0	0	0	0	0	0	0	0	1	0	0	0	0	1	0	0	0	0	0	0	0	0
758	Honest	-0.989414	0.385916	0.477399	11.5175	0	0	1	0	1	1	1	1	1	1	0	1	0	0	0	0	0	0	0	1	1	0
759	Honest	-1.19847	0.930458	0.87118	10.0138	0	0	1	1	1	1	1	0	0	0	0	1	0	0	0	0	0	0	0	0	0	0
760	Honest	2.11576	0.215419	0.506042	8.3782	0	0	1	1	1	1	1	1	1	1	1	1	1	1	1	1	1	1	0	1	0	1
761	Honest	0.760495	0.771946	0	17.5882	0	0	1	1	1	0	1	1	0	1	1	1	1	1	1	0	1	0	1	1	0	0
762	Honest	0.323723	-0.922982	1.11598	19.0632	0	0	1	1	1	1	1	1	1	1	1	1	1	1	0	1	0	0	1	0	0	0
763	Honest	2.12562	-0.495181	1.20202	15.5496	0	0	1	1	1	1	1	1	1	1	1	1	1	0	1	1	1	1	1	1	1	0
764	Honest	1.2156	-0.897298	1.92825	12.1424	0	0	1	0	1	1	1	1	1	1	1	1	1	1	1	1	1	0	1	1	0	0
765	Honest	-1.91814	-0.589432	0.0676922	17.7563	0	0	0	0	0	1	0	1	1	0	0	0	0	0	0	0	0	0	0	0	0	0
766	Honest	1.42877	-0.058027	0	15.9918	0	0	1	1	1	1	1	1	1	1	1	1	1	1	1	1	1	1	1	0	0	0
767	Honest	0.647118	-0.993496	0.923986	16.971	0	0	1	1	1	0	1	1	1	1	1	1	1	1	0	0	0	0	0	0	0	0
768	Honest	0.465812	0.335751	1.40653	3.58838	0	0	1	1	1	1	0	1	1	1	1	1	1	1	0	0	1	0	0	0	0	0
769	Honest	0.72507	-0.837616	1.8698	14.168	0	0	1	1	1	0	1	1	0	1	1	1	1	0	0	1	1	0	0	0	0	0
770	Honest	-1.21625	1.2631	0.587996	7.844	0	0	1	1	1	1	0	1	0	0	0	1	0	0	0	0	0	0	0	0	0	0
771	Honest	0.314801	-0.155715	0.493456	14.1173	0	0	1	1	1	1	1	1	1	1	0	1	0	1	0	0	0	0	0	0	0	0
772	Honest	0.962033	-0.72516	1.0245	15.3607	0	0	1	0	1	0	1	1	1	1	1	1	1	0	1	1	1	0	0	1	0	0
773	Honest	1.73803	0.672058	0.316248	18.038	0	0	1	1	1	1	1	1	1	1	0	1	1	1	0	1	0	1	0	1	0	0
774	Honest	-0.457297	0.0189147	0.550169	6.80802	0	0	1	0	1	0	0	0	1	1	0	1	0	0	1	0	0	0	0	0	0	0
775	Honest	0.187491	1.90742	0.997647	13.2625	0	0	1	1	1	1	1	1	0	0	1	0	0	0	0	0	1	0	0	1	0	0
776	Honest	0.0717967	0.98252	0.654992	12.1905	0	0	1	1	1	1	1	1	1	1	0	0	0	1	1	0	0	0	1	0	0	0
777	Honest	-0.0230199	0.295909	0.111836	13.4274	0	0	1	1	1	1	0	1	0	1	0	1	1	0	1	1	1	1	0	0	0	0
778	Honest	-1.48998	-1.23247	1.53761	16.351	0	0	0	0	1	0	0	0	0	0	1	0	0	0	0	0	0	0	0	0	0	0
779	Honest	1.2309	0.462982	1.38656	11.7846	0	0	1	1	1	1	1	1	0	0	1	1	1	1	0	1	1	0	1	1	1	0
780	Honest	-0.145852	0.088654	0	10.8885	0	0	1	1	1	0	0	1	0	1	0	0	1	1	0	0	1	0	0	1	0	0
781	Honest	-2.2549	-0.706464	1.08971	13.5351	0	0	0	0	0	1	0	0	0	0	0	0	0	0	0	0	0	0	0	0	0	0
782	Honest	1.26144	-0.804349	1.62729	12.5925	0	0	1	1	1	1	1	1	1	1	1	1	1	0	1	1	1	1	0	1	0	0
783	Honest	-0.215712	2.0429	0	18.5005	0	0	1	1	1	1	1	1	0	1	1	0	0	0	0	0	0	0	1	1	0	0
784	Honest	-0.767165	-0.823382	0.099529	13.1325	0	0	1	1	1	1	0	0	1	0	1	1	0	1	0	0	0	0	0	0	0	0
785	Honest	0.413933	-0.395765	1.20507	12.0396	0	0	1	1	1	1	1	1	1	1	1	1	1	0	0	0	0	0	0	0	0	0
786	Honest	1.64608	1.11469	0.145256	12.2295	0	0	1	1	1	1	1	1	1	1	1	1	1	1	1	1	0	0	0	1	0	0
787	Honest	0.299692	-0.218189	1.37847	17.9054	0	0	1	1	1	0	1	1	1	0	0	1	1	0	1	0	0	0	0	0	1	0
788	Honest	-0.643942	0.810351	0.69461	4.94187	0	0	1	1	1	1	0	1	1	0	1	0	1	0	0	0	0	0	0	1	0	0
789	Honest	-0.908562	-0.0569657	0.839	12.3734	0	0	1	1	1	1	0	0	1	0	0	0	0	1	0	0	0	0	0	0	0	0
790	Honest	1.43054	0.238211	0.142316	18.9427	0	0	1	1	1	1	0	1	1	1	1	0	1	1	1	1	1	0	1	0	1	0
791	Honest	-1.44906	-1.6861	0.783341	3.97225	0	0	0	0	0	1	0	0	0	0	0	0	0	0	0	0	1	0	0	0	0	0
792	Honest	-1.15398	-1.57868	0.410773	13.1297	0	0	1	0	1	1	0	0	0	0	0	0	1	0	0	0	0	0	0	0	0	0
793	Honest	1.31865	1.73697	0.836115	14.4622	0	0	1	1	1	1	1	1	1	1	0	1	1	0	1	1	1	0	1	0	1	1
794	Honest	0.906258	0.85325	1.01587	22.2226	0	0	1	1	0	1	0	1	1	1	0	0	1	1	1	0	1	1	0	1	0	0
795	Honest	-0.0303116	-1.01603	1.24288	5.18985	0	0	1	1	1	1	0	1	0	1	1	0	0	0	0	1	0	0	0	0	0	0
796	Honest	1.7044	1.37662	0.467443	10.8409	0	0	1	1	1	1	0	1	1	1	1	1	1	1	1	1	1	1	1	0	0	0
797	Honest	0.364675	-2.66679	1.05741	10.8194	0	0	1	1	1	1	1	1	1	1	0	0	1	0	0	0	0	0	0	0	0	0
798	Honest	-1.32278	-1.32459	0.313309	10.7111	0	0	1	0	0	1	1	0	1	1	0	1	0	0	0	0	0	0	0	0	0	0
799	Honest	0.506699	-0.728395	1.03617	12.3512	0	0	1	1	1	1	1	1	1	1	1	1	0	1	1	1	0	0	0	0	0	0
800	Honest	1.34348	1.28598	0	17.4123	0	0	1	1	1	1	1	1	1	1	1	1	0	1	0	0	1	1	0	0	1	0
801	Honest	-0.663076	1.09547	0.142102	9.09929	0	0	1	0	1	1	0	1	1	0	0	0	1	1	0	0	0	0	0	1	0	0
802	Honest	0.0983904	1.34581	0.549754	17.1911	0	0	1	1	1	0	0	1	1	1	0	1	0	0	0	1	0	0	0	0	0	0
803	Honest	-1.58606	-0.237045	1.1732	8.87785	0	0	1	1	0	0	0	0	1	0	0	0	0	0	0	0	0	0	0	0	0	1
804	Honest	-0.426286	-1.93967	1.70792	4.56463	0	0	1	1	0	0	0	0	1	0	1	1	0	0	0	0	0	0	0	0	0	0
805	Honest	1.17234	-0.481277	0.383595	20.2993	0	0	1	1	1	1	1	1	1	1	0	1	1	1	1	0	1	0	0	0	0	0
806	Honest	-0.0113777	-0.279646	0.996575	3.84004	0	0	1	1	1	1	1	1	0	1	0	0	1	1	0	0	0	0	0	0	0	0
807	Honest	-0.510042	-3.36411	1.11718	18.9767	0	0	1	0	1	1	1	0	0	0	1	1	0	1	0	0	0	0	0	1	0	0
808	Honest	0.051598	0.751518	0.844966	14.7438	0	0	1	1	1	0	1	1	1	1	0	0	0	0	0	1	0	0	0	1	0	0
809	Honest	0.476224	0.362802	1.15211	14.9047	0	0	1	1	1	1	0	0	1	1	1	0	0	0	1	1	0	1	1	1	0	0
810	Honest	1.70525	-0.0872563	1.61292	16.5218	0	0	1	1	1	1	0	1	1	1	1	1	1	0	1	0	1	1	1	1	0	0
811	Honest	1.48238	1.4458	0.984431	14.3895	0	0	1	1	1	1	1	1	0	1	1	0	0	1	1	0	1	0	1	0	0	0
812	Honest	-0.40723	0.000463782	0	13.533	0	0	1	1	1	1	1	1	1	1	0	1	1	1	0	0	0	0	0	1	0	0
813	Honest	0.0510214	0.832705	0.746138	11.5079	0	0	1	1	1	1	1	1	1	1	1	1	1	0	0	0	0	0	1	0	0	0
814	Honest	-1.25489	0.380234	2.09672	10.2221	0	0	1	0	0	1	0	0	0	0	1	0	0	0	0	0	0	0	0	0	0	0
815	Honest	-0.465758	-0.753231	1.14931	5.06341	0	0	1	1	1	0	1	1	0	1	0	1	1	0	0	0	0	1	1	0	0	0
816	Honest	1.02003	-0.186	1.49611	13.7021	0	0	1	0	1	0	1	1	1	1	1	1	1	0	0	1	1	0	0	1	0	0
817	Honest	-1.05732	0.749971	0.253562	19.0256	0	0	1	1	1	0	0	1	1	1	1	0	0	0	0	0	1	0	0	0	0	0
818	Honest	-0.538303	-0.433902	0.441682	14.5671	0	0	1	1	1	0	1	1	1	0	1	1	0	1	0	0	0	0	0	0	0	0
819	Honest	-1.64909	-1.67654	1.20093	8.34838	0	0	1	0	0	1	1	0	1	0	1	1	0	0	0	0	0	0	0	0	0	0
820	Honest	2.66251	0.548873	0.313593	14.7484	0	0	1	1	1	1	1	1	1	1	1	1	1	1	1	1	1	1	1	1	1	1
821	Honest	-0.125441	-1.73085	2.04604	17.6066	0	0	1	0	1	1	1	1	1	1	1	0	0	0	0	0	0	0	0	0	0	0
822	Honest	1.7792	-0.125153	1.09398	14.3291	0	0	1	1	1	1	1	1	1	1	1	1	1	1	1	1	1	1	0	1	1	1
823	Honest	-0.435341	0.205948	1.28356	12.8045	0	0	1	1	0	1	0	1	1	1	0	1	0	0	0	0	0	0	0	0	0	0
824	Honest	0.0620932	-0.451804	0.76898	16.3011	0	0	1	0	1	1	1	1	1	1	0	0	0	0	0	0	0	0	0	0	1	0
825	Honest	-0.0719296	0.435151	1.80707	16.7844	0	0	1	1	1	1	0	0	0	0	1	1	0	0	1	0	0	0	0	0	0	0
826	Honest	-0.977341	0.477081	1.61595	7.68036	0	0	1	1	1	0	0	0	1	1	0	1	0	0	0	0	0	0	0	0	0	0
827	Honest	-0.360891	2.37735	0.71448	14.5285	0	0	1	1	1	1	1	1	1	1	1	0	1	1	0	0	0	0	0	1	0	0
828	Honest	0.711337	-0.35269	0.608516	11.1563	0	0	1	1	1	1	1	1	1	1	1	1	0	1	1	0	1	1	0	0	0	0
829	Honest	-0.379046	0.18074	0.418908	14.4532	0	0	1	0	1	0	1	1	0	0	0	1	0	0	1	0	1	0	0	0	0	0
830	Honest	0.024748	-0.0503971	0.817401	13.3771	0	0	1	0	1	0	1	0	1	1	1	0	1	0	1	1	0	0	0	0	0	0
831	Honest	0.485134	-0.748426	0.376663	14.4479	0	0	1	1	1	0	1	1	1	1	0	1	1	0	1	0	0	0	0	0	0	0
832	Honest	-0.921027	-0.462228	0.758753	12.0228	0	0	1	1	1	1	0	0	0	0	0	0	0	0	0	0	0	0	1	0	0	0
833	Honest	-0.352331	-0.739118	1.38103	8.02696	0	0	1	1	1	1	1	0	1	0	1	1	0	1	0	0	0	0	0	0	0	0
834	Honest	-0.615147	-1.04933	1.32153	12.4876	0	0	1	1	1	1	1	1	0	0	0	0	0	0	1	1	0	0	0	0	0	0
835	Honest	1.12283	-1.52526	0.491625	20.5456	0	0	1	0	1	1	1	1	1	1	1	1	1	1	1	0	1	1	0	0	0	1
836	Honest	-0.38822	-0.0956665	0.934938	15.6244	0	0	1	0	1	0	1	1	1	1	0	0	0	1	0	0	0	0	0	0	0	0
837	Honest	-0.140454	0.218953	0.434307	10.8106	0	0	1	1	1	0	1	1	0	0	0	1	0	1	0	0	0	0	0	0	0	0
838	Honest	0.674152	0.275055	1.12272	20.2474	0	0	1	1	1	1	1	1	0	1	1	1	1	0	1	1	0	1	0	0	0	1
839	Honest	0.875572	-2.26291	1.70624	14.5323	0	0	1	1	1	1	1	1	0	1	1	1	0	1	0	0	0	1	1	1	0	0
840	Honest	0.592972	0.636107	1.2998	14.8714	0	0	1	1	1	0	1	1	1	1	1	1	1	1	1	1	0	0	1	0	0	0
841	Honest	0.484122	-0.426908	0.400497	13.8656	0	0	1	1	1	1	1	0	1	1	1	1	1	1	0	0	0	0	0	0	0	0
842	Honest	-1.54823	-0.020576	1.43517	8.515	0	0	1	1	0	1	1	0	1	1	0	0	0	0	0	0	0	0	0	0	0	0
843	Honest	-0.620748	-0.872609	1.25273	11.8306	0	0	1	1	1	1	1	0	1	1	0	1	0	0	0	0	0	0	0	0	0	0
844	Honest	0.770851	0.753303	0.480252	17.8562	0	0	1	1	1	1	1	1	1	1	1	0	0	1	1	0	1	0	1	1	0	0
845	Honest	-0.299543	1.07916	0.149321	7.26344	0	0	1	1	1	1	1	1	1	1	0	0	0	0	0	0	0	0	0	0	0	0
846	Honest	-0.436401	-0.160118	1.28281	2.21452	0	0	1	0	0	1	0	1	1	1	1	1	0	0	1	0	0	0	0	0	0	0
847	Honest	-0.163451	-0.201175	0.620258	15.8178	0	0	1	1	1	1	1	1	1	1	0	0	0	0	1	0	1	0	0	0	0	0
848	Honest	0.620444	0.394017	0.313901	12.7621	0	0	1	1	1	1	1	1	1	1	0	1	1	1	1	0	1	1	0	0	0	0
849	Honest	-1.4222	-1.74344	0.103357	16.4002	0	0	1	1	0	0	1	1	0	0	0	0	0	0	0	0	0	0	0	0	0	0
850	Honest	-1.26311	0.161956	0.764127	5.99917	0	0	0	1	1	1	1	0	1	0	1	0	0	0	0	0	0	0	0	0	0	0
851	Honest	0.452886	1.51624	0.428051	15.2947	0	0	1	1	1	1	1	1	1	0	0	1	1	1	1	0	0	0	0	0	0	0
852	Honest	0.312553	0.639558	1.23311	10.0566	0	0	1	1	1	1	1	1	1	1	1	1	0	1	0	1	0	0	1	0	0	1
853	Honest	0.65356	0.943302	1.88333	11.1254	0	0	1	1	1	1	1	1	1	1	1	1	1	1	0	1	0	0	0	1	0	1
854	Honest	-0.579159	0.542511	0.187544	6.26207	0	0	1	1	1	0	1	0	1	0	1	0	0	0	0	0	1	0	0	0	0	0
855	Honest	-1.10811	0.0615948	1.42177	16.7835	0	0	1	0	1	0	0	1	0	0	0	1	0	0	0	0	0	0	0	0	0	0
856	Honest	-0.0787461	-1.80906	1.51276	16.092	0	0	1	1	1	1	0	0	1	0	1	0	0	0	0	1	0	0	0	0	0	0
857	Honest	-0.0638872	1.06235	0	17.0902	0	0	1	1	1	1	0	1	0	1	1	1	1	1	0	1	0	0	0	0	0	0
858	Honest	1.14775	1.2463	0.972951	8.21692	0	0	1	1	1	0	1	1	1	1	1	1	1	1	0	1	0	1	1	0	1	0
859	Honest	0.108738	0.397978	0.85566	14.678	0	0	1	1	1	1	1	1	1	1	0	1	0	1	1	0	1	0	0	1	0	0
860	Honest	-1.31358	0.133669	0.394318	13.8133	0	0	0	1	1	1	1	1	0	0	1	0	0	0	0	0	0	0	0	0	0	0
861	Honest	0.261444	0.271945	0.250917	3.54332	0	0	1	1	1	1	1	1	1	1	1	0	1	1	1	1	1	1	0	0	0	0
862	Honest	1.34124	2.03143	1.08277	12.565	0	0	1	1	1	1	1	1	1	1	1	1	1	1	1	0	0	0	1	0	0	0
863	Honest	-1.91523	-0.357579	1.00962	12.9915	0	0	0	0	0	0	1	1	0	0	0	0	0	0	0	0	0	0	0	0	0	0
864	Honest	0.329654	-0.188524	1.10249	10.7844	0	0	1	1	1	1	1	1	1	0	1	1	1	0	1	1	0	1	1	0	0	0
865	Honest	1.2505	0.449061	1.09605	11.5968	0	0	1	0	1	1	1	1	1	1	1	1	1	1	0	1	1	1	1	1	0	0
866	Honest	0.406987	0.829896	0.597966	5.75111	0	0	1	1	1	1	0	1	1	1	1	1	0	1	1	1	0	1	1	0	0	0
867	Honest	0.925471	2.50273	0	15.9869	0	0	1	1	1	1	1	1	1	1	1	1	0	1	0	1	1	1	0	0	1	0
868	Honest	-1.60515	-0.221114	1.00316	15.9524	0	0	1	0	0	0	1	0	0	1	0	0	0	0	0	0	1	0	0	0	0	0
869	Honest	-0.583288	-0.0264168	0.0955435	10.0751	0	0	1	1	1	1	1	1	1	1	0	1	1	1	1	0	0	1	0	0	0	0
870	Honest	-1.22507	-1.03904	0.788266	7.49925	0	0	1	0	1	1	0	0	1	1	0	0	0	1	0	0	0	0	0	0	0	0
871	Honest	0.765139	-0.27208	1.66187	14.966	0	0	1	1	1	1	1	1	1	1	1	0	0	1	1	0	0	1	0	0	1	0
872	Honest	1.25179	-0.0866601	1.06735	9.5324	0	0	1	0	1	1	1	1	1	1	0	1	1	1	1	1	0	0	0	0	0	0
873	Honest	1.30031	0.0564274	0.729801	6.4376	0	0	1	1	1	1	1	1	1	1	0	1	1	1	1	1	1	1	0	0	0	0
874	Honest	0.536523	-1.85644	0.92472	13.4792	0	0	1	1	1	1	1	1	1	1	1	1	1	1	0	1	0	0	0	1	0	0
875	Honest	0.685963	0.13315	1.7216	11.7192	0	0	1	1	1	1	1	1	1	1	1	1	1	0	1	0	1	1	0	0	0	0
876	Honest	1.23521	0.110404	1.0919	17.1635	0	0	1	1	1	1	1	1	1	0	1	1	1	1	1	0	0	1	0	1	0	0
877	Honest	-0.311107	0.265031	0.108952	16.0198	0	0	1	0	1	1	0	1	1	0	1	1	1	0	1	1	0	0	0	1	0	0
878	Honest	-0.404252	-1.11174	1.16576	10.4294	0	0	1	1	0	1	1	1	1	0	1	0	1	0	0	1	0	0	0	0	0	0
879	Honest	1.27294	0.54213	0.323433	17.8983	0	0	1	1	1	0	0	1	1	1	0	1	1	0	1	0	1	1	1	1	0	0
880	Honest	-0.349706	0.336648	0.107751	9.27608	0	0	1	1	1	1	1	1	0	1	0	0	1	0	0	0	1	0	0	0	0	0
881	Honest	0.925672	-0.758171	0.620247	17.0879	0	0	1	1	1	0	0	1	0	1	1	1	1	1	1	0	1	1	0	0	0	0
882	Honest	-1.72562	-0.729981	0.499802	17.8962	0	0	0	1	0	0	1	1	0	0	0	0	0	0	0	0	0	0	1	0	0	0
883	Honest	0.781974	0.536535	1.21796	22.8196	0	0	1	1	1	1	1	0	1	0	1	1	1	0	0	0	0	1	0	1	0	0
884	Honest	0.112434	1.10639	0.0337617	14.8142	0	0	1	1	1	1	1	0	1	0	1	1	0	0	0	0	0	0	0	1	0	0
885	Honest	0.591486	0.970962	1.33871	11.5299	0	0	1	0	1	0	1	1	0	1	1	1	1	1	1	0	0	1	0	1	0	0
886	Honest	-0.207167	-0.125182	0.861065	15.502	0	0	1	1	1	1	1	0	0	0	0	1	1	0	0	0	0	0	0	0	0	0
887	Honest	1.48341	0.735524	0.618416	13.9987	0	0	1	1	1	1	0	1	1	1	0	0	1	1	1	1	1	1	0	1	1	1
888	Honest	-0.928247	-0.642591	0.313313	14.7184	0	0	1	1	0	0	0	1	0	0	1	0	0	0	0	1	0	0	1	0	0	0
889	Honest	0.912689	-0.525981	0.207366	14.25	0	0	1	1	1	0	1	1	1	1	1	1	1	0	1	1	1	1	1	0	1	0
890	Honest	0.104165	0.187558	0.996594	18.8796	0	0	1	1	1	1	1	1	1	1	1	0	1	0	0	0	1	0	0	0	0	0
891	Honest	-0.852045	0.151185	0.991452	10.8829	0	0	1	1	0	1	1	1	0	0	1	1	0	0	0	0	0	0	0	0	0	0
892	Honest	0.607639	0.024937	0.514125	12.6923	0	0	1	1	1	1	1	1	0	0	0	0	1	0	0	0	1	0	1	0	0	0
893	Honest	-1.39004	-0.438075	1.68344	9.16807	0	0	1	0	0	1	1	0	0	0	1	0	0	0	0	0	0	0	0	0	0	0
894	Honest	0.0439196	0.668281	0.467268	16.4718	0	0	1	1	1	0	1	1	1	0	0	0	0	1	0	0	1	0	0	0	0	0
895	Honest	0.992961	0.560946	0.476594	10.2499	0	0	1	1	1	1	1	1	1	1	0	1	1	1	1	1	0	0	1	0	1	0
896	Honest	0.150008	-0.931107	1.43049	7.51358	0	0	1	1	1	1	0	1	1	1	0	1	1	0	1	1	0	0	0	0	0	0
897	Honest	0.580303	-0.0458384	1.18014	18.453	0	0	1	1	1	1	0	1	1	1	1	0	0	0	0	1	0	0	0	0	0	0
898	Honest	0.0831378	0.923686	0	16.4615	0	0	1	1	1	1	1	1	1	0	1	1	1	0	0	0	1	0	1	0	0	0
899	Honest	-0.136628	1.54707	0	15.0319	0	0	1	1	1	1	1	1	1	0	0	1	1	0	0	0	0	0	0	0	0	0
900	Honest	1.02786	-0.190257	1.3083	14.9237	0	0	1	1	1	1	0	1	0	1	1	1	1	0	0	0	1	0	1	0	0	0
901	Honest	-0.315208	0.662988	1.19063	12.7973	0	0	1	1	1	1	1	1	1	1	0	1	0	0	0	0	1	0	1	1	0	0
902	Honest	-0.0744086	-0.224243	0.579762	10.9819	0	0	1	1	1	0	1	1	1	1	1	0	1	0	0	0	0	0	1	0	0	0
903	Honest	-0.915141	-0.539324	1.8773	12.4914	0	0	1	0	1	1	0	0	0	0	0	0	1	0	0	0	0	0	0	0	0	0
904	Honest	1.14588	-0.166691	0.6699	7.206	0	0	1	1	1	1	1	0	1	1	1	1	1	1	1	1	0	1	1	1	0	0
905	Honest	0.0840695	-1.1063	0.594163	11.0911	0	0	1	1	1	1	1	1	1	1	1	1	0	1	1	0	0	0	0	1	0	0
906	Honest	2.22288	1.74699	1.13318	10.5582	0	0	1	1	1	1	1	1	1	1	1	1	1	1	1	1	1	1	0	1	0	1
907	Honest	-0.832355	1.84958	0.200397	9.91397	0	0	1	1	1	1	0	1	0	0	0	0	0	0	0	1	0	0	0	0	0	0
908	Honest	-2.33394	0.776976	1.03018	8.74449	0	0	0	1	0	0	0	1	0	0	0	0	0	0	0	0	0	0	0	0	0	0
909	Honest	2.10786	0.28726	0.516622	12.0041	0	0	1	1	1	1	1	1	1	1	1	1	1	1	1	0	1	1	0	0	0	0
910	Honest	0.168133	-0.10094	0.231058	10.635	0	0	1	0	1	0	1	1	1	1	1	1	1	0	0	1	0	0	0	0	0	0
911	Honest	-0.995094	1.904	0.0280269	20.1189	0	0	1	1	1	0	1	0	1	0	0	1	0	0	0	1	0	0	0	0	0	0
912	Honest	-0.265155	-0.320567	1.69204	8.94464	0	0	1	1	0	1	0	1	1	1	1	1	1	1	0	0	1	0	1	0	0	0
913	Honest	-0.867984	-0.956962	0.732083	15.9557	0	0	1	0	1	1	0	1	0	0	0	0	0	0	0	0	0	0	0	0	0	0
914	Honest	1.76289	0.180618	0.566808	7.57343	0	0	1	1	1	1	1	1	1	1	1	1	1	1	1	1	1	0	1	0	0	0
915	Honest	-0.0788363	0.786827	0	12.7709	0	0	1	1	1	1	1	0	1	0	1	0	0	0	0	0	0	0	0	0	0	0
916	Honest	-1.6692	0.3335	1.33021	11.6013	0	0	1	1	0	0	0	0	0	0	0	0	0	0	0	0	0	0	0	0	0	0
917	Honest	-1.18708	0.124016	0.392882	8.44723	0	0	1	0	1	1	1	0	1	0	0	0	0	0	0	0	0	0	0	0	0	0
918	Honest	0.162263	-0.696602	0.719334	9.12484	0	0	1	1	1	0	0	1	1	1	0	1	1	0	0	0	0	0	1	0	0	0
919	Honest	-0.978748	-1.38415	0.852399	15.6666	0	0	0	0	0	1	1	0	0	1	0	1	0	0	0	0	1	0	0	0	0	0
920	Honest	1.25997	-1.46994	1.77685	8.09902	0	0	1	1	1	1	1	0	1	1	0	1	1	1	1	0	1	0	1	1	1	0
921	Honest	0.283728	1.20047	1.34184	10.2439	0	0	1	1	1	1	0	1	1	0	1	1	0	0	1	0	0	0	0	0	0	0
922	Honest	1.63622	-0.226354	1.15246	8.20544	0	0	1	1	1	0	1	1	1	1	1	1	1	1	1	1	1	0	0	0	0	0
923	Honest	-0.536697	0.703832	0	11.4315	0	0	0	1	1	0	1	1	1	0	1	0	0	1	0	0	0	0	1	0	0	0
924	Honest	0.152273	-0.690872	1.44808	21.0633	0	0	1	1	1	1	1	0	0	1	1	1	0	1	0	0	0	0	1	0	0	0
925	Honest	-0.803962	-0.242607	0.944001	8.36416	0	0	1	1	0	1	1	1	0	0	1	1	0	0	0	0	0	0	0	1	0	0
926	Honest	0.0198815	0.370858	0.213514	12.6098	0	0	1	1	1	0	1	0	1	1	0	0	0	1	1	0	0	0	0	0	0	0
927	Honest	-1.2726	-0.280311	0.557531	13.133	0	0	1	0	1	0	0	0	1	0	0	0	0	0	0	0	0	0	0	0	0	0
928	Honest	-1.3634	0.384131	1.10898	10.6205	0	0	1	0	0	0	1	1	0	0	0	0	0	0	0	0	0	0	1	0	0	0
929	Honest	-1.07166	0.554273	0.575666	10.5192	0	0	0	0	1	1	0	0	1	1	0	0	0	0	0	0	0	0	1	0	0	0
930	Honest	0.169697	-0.035163	0.489205	12.0889	0	0	1	1	1	1	1	1	1	0	1	1	1	1	1	0	0	0	1	0	0	0
931	Honest	-0.727074	0.187454	0.595316	16.0032	0	0	1	0	1	0	0	1	0	0	1	0	0	0	0	0	0	0	0	0	0	0
932	Honest	-2.33484	-0.458781	0.412539	16.215	0	0	0	1	0	0	0	0	0	0	0	0	0	0	0	0	0	0	0	0	0	0
933	Honest	-0.376601	-0.774194	1.26734	18.6806	0	0	1	0	0	1	0	1	1	0	1	1	0	0	0	1	1	1	0	0	0	0
934	Honest	-0.446239	-1.35173	0.643182	12.48	0	0	1	1	0	1	0	1	0	0	1	0	0	0	0	0	0	0	0	0	0	0
935	Honest	-0.199527	-1.4275	1.83978	14.8524	0	0	1	1	1	0	1	0	0	1	0	0	0	1	0	1	1	0	0	0	0	0
936	Honest	-0.807661	-1.66236	1.42381	11.2489	0	0	1	0	1	1	0	1	1	0	1	0	0	0	0	0	1	0	1	0	0	0
937	Honest	0.0439884	1.51298	0.567856	12.9885	0	0	1	1	1	1	1	1	1	0	1	0	0	1	0	0	0	0	1	0	0	0
938	Honest	0.569049	-1.04984	1.10856	13.2079	0	0	1	1	1	1	1	1	1	1	1	0	1	1	1	1	0	0	0	0	0	0
939	Honest	1.92518	-0.00860656	0.209493	13.5406	0	0	1	1	1	0	1	1	0	1	1	1	1	1	1	1	1	1	1	0	1	1
940	Honest	-0.606926	0.263384	0	14.5055	0	0	1	1	0	1	1	0	1	1	1	0	0	0	0	0	1	0	0	0	0	0
941	Honest	2.34246	0.656561	0.0821949	17.4418	0	0	1	1	1	1	1	1	1	1	1	1	1	1	1	1	0	1	1	1	0	0
942	Honest	1.63548	1.05456	0.401955	22.7572	0	0	1	1	1	1	1	1	1	1	1	1	1	1	1	1	0	0	1	0	0	0
943	Honest	2.09402	-0.416314	1.37707	12.9324	0	0	1	1	1	1	1	1	1	1	1	1	1	1	1	1	1	1	0	0	1	1
944	Honest	-0.522593	-0.636074	1.4335	17.7603	0	0	1	1	1	1	1	1	1	1	0	1	0	0	0	0	0	0	0	0	0	0
945	Honest	0.264122	0.865713	1.03311	9.89893	0	0	1	1	1	1	1	1	1	1	0	0	0	1	0	0	0	0	0	1	0	0
946	Honest	-1.2469	-1.20602	1.20816	12.0333	0	0	1	0	1	0	0	0	0	0	0	1	0	0	0	0	0	0	0	0	0	0
947	Honest	1.59045	2.0631	0.305762	20.7954	0	0	1	1	1	1	1	1	1	1	1	1	1	0	1	1	1	1	1	0	0	1
948	Honest	-1.85496	-1.31097	1.44029	4.61651	0	0	0	1	1	0	1	0	0	0	1	0	0	0	0	0	0	0	0	0	0	0
949	Honest	0.0128668	-0.734626	1.07021	12.7679	0	0	1	1	1	0	1	1	0	1	0	0	0	0	0	1	0	0	0	0	0	0
950	Honest	0.21221	-0.224135	0.122105	15.8247	0	0	1	1	1	1	0	0	1	1	1	1	0	0	1	0	0	1	0	0	0	0
951	Honest	-0.33604	-1.26191	1.23055	13.5356	0	0	1	1	1	0	1	1	1	0	0	0	0	0	0	0	1	0	0	0	0	0
952	Honest	-0.596903	0.1639	0.422154	7.8634	0	0	1	1	1	1	1	0	0	1	0	1	0	0	0	0	1	0	0	0	0	0
953	Honest	-1.4515	-0.625799	1.04344	11.191	0	0	1	1	1	1	1	0	0	0	0	0	0	0	0	0	0	0	0	0	0	0
954	Honest	-0.322637	-0.0437719	0.469881	20.166	0	0	1	1	1	1	0	1	1	1	1	1	0	1	0	0	0	1	0	0	0	0
955	Honest	-0.0345643	-0.079576	0.184319	16.7133	0	0	1	1	1	1	1	1	1	1	1	1	1	0	0	0	0	0	0	1	0	0
956	Honest	-0.387435	-0.504262	0.756759	11.4744	0	0	1	1	1	1	1	1	0	1	0	1	1	0	0	0	0	0	0	0	0	0
957	Honest	-2.16165	0.216965	1.19261	17.2783	0	0	0	1	0	1	1	0	0	0	0	0	0	0	0	0	0	0	0	0	0	0
958	Honest	-0.72317	0.281596	0.792101	16.877	0	0	1	1	1	0	0	1	0	0	1	0	0	0	0	0	0	0	0	0	0	0
959	Honest	-0.993147	-1.45013	1.38981	3.33546	0	0	1	1	1	0	1	1	0	0	1	0	0	0	0	0	0	0	0	0	0	0
960	Honest	-1.30558	-0.784974	0.775806	10.2727	0	0	0	0	1	0	1	0	1	0	0	0	0	0	0	0	0	0	0	0	0	0
961	Honest	1.45497	0.802619	0	15.3977	0	0	1	1	1	1	1	1	1	1	1	1	1	1	1	1	1	1	1	0	1	1
962	Honest	-1.35291	0.19936	1.12143	17.1961	0	0	1	0	1	0	1	0	0	0	0	0	0	0	0	0	0	0	0	0	0	0
963	Honest	-0.961177	-1.01442	0.582101	12.6216	0	0	1	1	0	0	1	1	1	0	0	0	0	0	0	0	0	0	0	0	0	0
964	Honest	-0.568668	-1.98974	0.636668	13.7821	0	0	1	1	0	0	0	1	1	1	0	0	0	0	1	0	0	0	0	0	0	0
965	Honest	-1.03767	-1.52167	0.731147	7.19548	0	0	1	0	0	0	1	1	1	0	1	0	0	0	0	0	0	0	0	0	0	0
966	Honest	0.678675	0.827131	1.21832	14.3561	0	0	1	1	1	1	0	1	1	1	1	1	0	0	0	0	0	0	0	0	1	0
967	Honest	-0.497263	0.275039	0.592379	20.8032	0	0	1	1	1	1	1	1	1	0	0	1	0	0	0	1	0	0	0	0	0	0
968	Honest	2.3076	0.46208	1.41188	16.3014	0	0	1	1	1	1	1	1	1	1	1	1	1	1	0	1	1	1	0	1	1	1
969	Honest	-0.431335	-1.03416	0.204526	7.59604	0	0	1	1	1	1	0	0	1	1	1	1	0	0	0	0	0	0	0	0	0	0
970	Honest	0.216961	0.27461	0.409744	12.8451	0	0	1	1	1	0	1	0	1	1	1	0	1	0	0	0	0	0	1	0	0	0
971	Honest	1.61086	-1.09785	1.56731	10.0929	0	0	1	1	1	1	1	1	1	1	1	1	1	1	1	1	1	1	1	1	1	0
972	Honest	-1.72398	1.61343	1.1308	9.6169	0	0	0	0	0	0	1	0	0	0	0	0	0	0	0	0	0	0	0	0	0	0
973	Honest	-1.45336	-0.727068	2.08004	7.69738	0	0	1	1	0	0	0	0	0	0	0	0	0	0	0	0	0	0	0	0	0	1
974	Honest	-2.60419	-0.801135	1.06571	9.64484	0	0	0	0	0	0	0	0	1	1	1	0	0	0	0	0	0	0	0	0	0	0
975	Honest	0.304747	0.817859	0.673408	12.7823	0	0	1	1	1	0	0	1	1	1	1	1	1	0	0	1	0	0	0	0	0	0
976	Honest	-0.513734	0.438077	0.783974	15.4911	0	0	1	1	1	1	1	1	0	1	0	1	0	0	0	0	0	0	1	0	1	0
977	Honest	2.18126	-0.00845408	0	17.2232	0	0	1	1	1	0	1	1	1	1	1	1	1	1	1	1	0	1	1	1	1	0
978	Honest	0.61964	1.66725	0.960925	21.1747	0	0	1	1	1	1	1	1	0	1	0	1	1	1	1	0	0	1	0	0	0	0
979	Honest	1.71175	-0.684928	1.00989	7.80191	0	0	1	1	1	1	1	1	1	1	1	1	1	1	1	1	1	1	1	1	1	0
980	Honest	-1.71266	0.108798	1.17517	12.1975	0	0	1	1	0	0	0	0	1	0	0	0	0	0	0	0	0	0	0	0	0	0
981	Honest	-0.945917	-1.77395	2.13669	9.84787	0	0	1	1	1	0	1	1	0	0	1	0	0	0	0	0	0	0	1	0	0	0
982	Honest	-1.35563	-0.0409772	1.61084	11.4285	0	0	1	1	0	1	0	0	0	0	1	0	0	0	0	0	0	0	0	0	0	0
983	Honest	-0.0551026	0.177213	0.481047	15.3257	0	0	1	1	1	1	1	1	1	0	1	1	1	0	0	0	0	0	0	0	0	0
984	Honest	-0.359513	-0.816483	0.498615	12.0148	0	0	1	1	1	0	1	1	0	1	1	1	0	0	0	0	0	0	1	0	0	0
985	Honest	-2.16676	-0.953568	0.48424	11.4489	0	0	1	0	0	0	1	0	0	0	0	0	0	0	0	0	0	0	0	0	0	0
986	Honest	0.258548	-0.299724	1.2552	14.6864	0	0	1	1	1	1	1	1	1	1	1	1	1	1	1	1	0	1	0	0	0	1
987	Honest	0.269895	1.39182	0.684811	11.1374	0	0	1	1	1	1	1	1	1	1	1	1	1	0	0	0	0	0	0	1	0	0
988	Honest	0.974394	-0.0638687	1.21449	6.71483	0	0	1	1	1	1	1	1	0	1	1	0	1	1	1	0	0	1	0	0	0	0
989	Honest	-1.69484	-1.50931	1.43429	13.7606	0	0	1	1	0	1	1	0	0	0	0	0	0	1	0	0	0	0	0	1	1	0
990	Honest	0.159282	-0.773818	1.65181	15.0293	0	0	1	1	1	1	1	0	1	1	0	1	1	0	0	1	0	0	0	0	0	0
991	Honest	-0.000963619	0.703609	0.533171	16.6902	0	0	1	1	1	1	1	1	0	0	0	1	1	1	1	0	0	0	0	0	0	0
992	Honest	0.297621	2.12358	0.364345	9.23758	0	0	1	1	1	1	1	1	0	1	1	1	1	1	0	0	0	0	0	0	0	0
993	Honest	0.356053	-1.02346	0.00465721	11.8302	0	0	1	1	1	1	1	1	1	1	0	1	0	1	0	0	0	1	0	1	0	0
994	Honest	-1.34289	-0.188492	0.823503	14.2059	0	0	1	1	1	1	1	0	1	0	0	0	0	0	0	0	0	0	0	0	0	0
995	Honest	0.305822	1.8804	0.735206	13.707	0	0	1	1	1	1	0	1	1	1	1	1	0	0	0	0	0	0	1	0	0	0
996	Honest	0.58758	0.567562	0.616718	16.0077	0	0	1	1	0	0	1	1	1	0	1	1	1	0	0	0	1	1	0	0	0	0
997	Honest	0.0443348	0.138519	0.616027	12.1392	0	0	1	1	1	1	1	1	1	1	1	0	1	0	1	0	0	0	0	0	0	0
998	Honest	-1.38627	-1.27553	1.15188	18.0211	0	0	1	0	0	0	0	0	0	0	1	0	0	0	0	0	0	0	0	0	0	0
999	Honest	1.07979	0.316378	0	20.5574	0	0	1	1	1	1	1	1	1	1	0	1	1	1	0	1	1	0	1	0	0	0
1000	Honest	0.0046524	-1.40643	1.37762	4.26519	0	0	1	1	1	0	1	1	0	1	0	0	1	1	0	1	0	0	0	0	0	0
1001	Honest	-0.115326	-0.226254	0.84123	16.9718	0	0	1	0	1	1	1	1	0	0	0	0	1	0	0	0	1	0	0	0	0	0
1002	Honest	-0.313623	-1.23453	1.90833	11.5818	0	0	1	1	1	1	1	1	0	0	0	0	0	1	0	0	0	1	0	0	0	0
1003	Honest	0.153509	1.63394	0.82935	18.5629	0	0	1	1	1	1	1	0	1	1	1	1	1	0	0	1	0	0	0	0	0	0
1004	Honest	-0.0253301	-1.37568	1.39704	16.0327	0	0	1	1	1	1	1	0	1	1	0	1	1	1	0	0	0	0	0	0	0	0
1005	Honest	0.240813	1.19687	0.545063	7.71258	0	0	1	0	1	0	1	1	1	1	1	0	1	1	1	0	0	0	0	0	0	0
1006	Honest	-0.00135636	0.417994	1.50865	9.57181	0	0	1	1	1	0	1	1	1	1	0	1	1	0	1	0	0	0	0	0	0	0
1007	Honest	-0.764628	-0.0747644	1.46288	15.9385	0	0	1	1	1	1	0	0	0	0	1	1	0	1	0	0	0	0	0	0	0	0
1008	Honest	0.730297	0.90889	0.112144	13.912	0	0	1	1	1	1	0	1	1	1	1	1	1	1	1	1	0	0	1	0	0	0
1009	Honest	-1.70473	-1.42566	0.959827	9.26062	0	0	1	0	0	0	0	0	0	0	0	0	0	0	0	0	0	0	0	0	0	0
1010	Honest	-0.17208	-0.0465682	1.05377	12.4666	0	0	1	0	1	1	1	1	1	0	0	0	0	1	0	0	0	0	0	1	0	0
1011	Honest	2.98205	-0.22625	1.24105	8.86862	0	0	1	1	1	1	1	1	1	1	1	1	1	1	1	1	1	1	1	0	1	1
1012	Honest	-1.72709	1.25259	0.718734	13.6874	0	0	1	0	1	0	1	0	0	0	1	0	0	0	0	0	0	0	0	0	0	0
1013	Honest	-1.17059	-0.4601	0.801944	12.9592	0	0	0	0	1	1	0	0	0	1	0	0	0	0	0	0	0	0	0	1	0	0
1014	Honest	0.00458555	1.01806	0.944431	16.8903	0	0	1	1	1	0	1	1	1	1	1	0	1	0	1	0	0	0	0	0	0	0
1015	Honest	0.0302159	-0.524405	0.527335	18.6247	0	0	1	1	1	0	1	1	1	0	0	0	1	0	0	0	0	0	1	0	0	0
1016	Honest	-0.332168	0.530518	1.29894	11.5857	0	0	1	0	1	1	0	0	0	1	0	0	0	0	1	1	0	0	0	0	0	0
1017	Honest	-0.905494	0.935003	0.682987	7.95282	0	0	1	1	1	0	1	0	1	1	1	0	0	0	0	0	0	0	0	0	0	0
1018	Honest	-0.394859	-0.802541	0.956308	16.0191	0	0	1	0	1	1	1	0	0	0	0	1	0	0	0	0	0	0	0	0	0	0
1019	Honest	-0.558412	-1.38388	0.955377	14.3513	0	0	1	0	1	1	0	1	0	0	1	1	1	0	0	0	0	0	0	0	0	0
1020	Honest	-0.714147	0.371188	0.9114	16.8632	0	0	1	1	1	1	1	1	0	0	1	0	0	1	0	0	0	0	0	0	0	0
1021	Honest	1.10053	0.987716	0	11.9418	0	0	1	1	1	1	1	1	1	1	1	0	1	1	0	1	1	1	0	0	0	0
1022	Honest	0.765568	0.465262	1.70933	9.24528	0	0	1	0	1	1	0	1	1	1	0	1	1	1	0	1	1	0	0	0	0	0
1023	Honest	-1.61279	-0.53306	1.4175	15.4402	0	0	0	1	0	0	0	0	0	0	0	0	0	0	0	0	0	0	0	0	0	0
1024	Honest	1.71712	1.72796	0.582568	9.73775	0	0	1	1	1	1	1	1	1	1	1	1	1	0	1	1	1	0	1	1	0	1
1025	Honest	-1.37068	0.277958	0	15.9276	0	0	1	1	1	1	0	0	1	0	0	1	0	0	0	0	0	0	0	0	0	0
1026	Honest	-2.39707	-1.37871	1.25665	8.5252	0	0	0	0	0	0	0	1	0	0	0	0	0	0	0	0	0	0	0	0	0	0
1027	Honest	-0.695194	0.50903	1.58968	16.6618	0	0	1	1	0	0	1	0	0	0	0	1	0	0	0	0	0	0	0	0	0	0
1028	Honest	0.0970477	-1.37463	3.27644	14.6887	0	0	1	1	1	1	1	1	1	0	0	1	0	0	0	0	0	0	0	0	0	0
1029	Honest	0.371039	-0.671266	0.748364	10.2922	0	0	1	1	1	1	1	1	1	1	1	1	0	0	1	0	0	0	0	0	0	0
1030	Honest	-1.23379	1.01673	0.720144	11.0651	0	0	1	0	1	1	0	1	0	0	0	0	0	0	0	0	0	0	0	0	0	0
1031	Honest	0.181487	-0.700131	0.743308	15.3772	0	0	0	0	1	0	1	1	1	0	0	1	1	1	1	0	1	0	0	0	0	0
1032	Honest	0.649796	0.655783	0.362099	10.7299	0	0	1	1	1	1	1	1	1	1	1	1	1	0	1	0	0	0	0	0	0	0
1033	Honest	0.336627	0.72917	0.411982	10.9764	0	0	1	1	1	0	1	1	0	0	1	0	0	1	1	0	0	1	1	0	0	0
1034	Honest	-1.26458	-0.137534	1.35679	5.71156	0	0	1	1	1	1	1	0	0	0	0	1	0	0	1	0	0	0	0	0	0	0
1035	Honest	0.0688265	2.00669	0.0504575	5.86633	0	0	1	1	1	0	0	1	1	1	1	1	0	0	0	0	1	0	0	0	0	1
1036	Honest	1.55343	1.44546	1.49464	9.41183	0	0	1	1	1	1	1	1	1	1	0	1	1	1	0	1	1	1	0	1	0	1
1037	Honest	0.207566	-0.633768	0.8386	4.65463	0	0	1	1	1	1	1	1	1	1	0	1	0	0	0	0	0	0	0	1	0	0
1038	Honest	-0.962928	-0.132501	0.637898	16.6897	0	0	1	1	1	1	0	1	0	0	0	0	0	0	0	0	0	0	0	0	0	0
1039	Honest	0.338464	-1.50191	1.3685	13.5567	0	0	1	1	1	1	1	1	1	1	1	1	1	1	1	0	1	0	1	0	1	0
1040	Honest	1.11338	0.664397	0.360287	12.1486	0	0	1	0	1	1	1	0	1	1	1	1	1	1	1	0	1	0	1	0	0	1
1041	Honest	-0.375865	0.157952	1.18842	13.0654	0	0	1	1	1	1	1	0	1	1	0	1	1	0	0	0	0	0	0	0	0	0
1042	Honest	0.0320103	-0.265439	2.46574	10.4352	0	0	1	1	1	1	0	1	0	1	0	0	1	0	0	1	1	0	0	0	0	0
1043	Honest	-1.52977	-0.418674	0.969104	9.92479	0	0	0	0	0	0	0	0	0	0	0	0	0	0	0	0	0	0	0	0	0	0
1044	Honest	-0.942076	0.537602	1.16226	9.66257	0	0	1	0	1	1	0	1	1	0	0	0	0	0	0	0	0	0	0	0	0	0
1045	Honest	-1.65404	-1.39494	0.736291	18.3631	0	0	1	1	0	0	0	0	1	0	0	0	0	0	0	0	0	0	0	0	0	0
1046	Honest	0.719837	-0.582834	0.463151	12.138	0	0	1	1	1	0	0	1	1	0	1	1	1	0	1	1	1	1	1	0	0	0
1047	Honest	0.48449	0.00697274	0	21.4832	0	0	1	1	1	1	1	1	1	1	1	0	0	1	1	0	0	0	0	0	0	0
1048	Honest	-0.509366	1.60885	0.989522	11.0296	0	0	1	0	0	1	1	1	1	0	0	1	1	0	0	0	0	0	0	0	0	0
1049	Honest	-1.18717	0.133918	1.85901	15.5374	0	0	1	1	0	1	1	0	0	0	0	1	0	0	0	0	0	0	0	0	0	0
1050	Honest	-1.04165	-1.22277	0.988497	6.75392	0	0	1	1	1	0	0	0	0	0	0	0	0	0	0	0	0	0	0	0	0	0
1051	Honest	0.371659	-1.2977	1.72519	10.8406	0	0	1	1	0	1	0	1	1	1	0	1	1	1	1	0	0	0	1	0	0	0
1052	Honest	0.170734	1.36055	0.473944	21.5401	0	0	1	1	1	0	0	1	1	1	0	0	0	0	0	1	1	0	1	1	0	0
1053	Honest	-1.64672	0.0288393	1.54888	13.3924	0	0	0	0	0	0	0	0	0	0	0	0	0	0	0	0	0	0	0	0	0	0
1054	Honest	-0.0982567	-0.849573	1.61687	11.5014	0	0	1	1	1	0	1	1	0	0	1	0	1	1	1	0	0	1	0	0	0	0
1055	Honest	1.41126	-2.11748	1.34769	15.3564	0	0	1	1	1	1	1	1	1	1	0	1	1	1	0	1	1	0	1	1	0	0
1056	Honest	0.112625	0.879116	0.776225	12.0157	0	0	1	1	1	1	1	1	0	1	1	1	0	0	0	0	0	0	1	0	0	0
1057	Honest	-1.05992	-1.13107	0.80436	9.85632	0	0	1	1	1	1	1	1	0	1	0	0	0	0	0	0	0	0	0	0	0	0
1058	Honest	-0.129007	1.22781	0.465897	20.2057	0	0	1	1	1	1	0	1	1	1	0	1	0	0	0	1	0	0	0	0	0	0
1059	Honest	0.00486665	-0.412412	0.550001	12.0723	0	0	1	1	1	1	1	1	1	1	1	1	0	0	1	0	0	1	0	1	0	0
1060	Honest	-0.552243	0.357409	0.687714	15.6919	0	0	1	1	1	1	0	1	1	1	0	0	0	0	0	0	0	0	0	0	0	0
1061	Honest	-1.42123	0.782963	0.385747	14.8621	0	0	0	0	0	0	0	1	1	0	0	0	0	0	0	0	0	0	0	0	0	0
1062	Honest	-1.28476	-1.21692	1.68628	9.46807	0	0	1	0	1	1	0	1	0	1	0	0	0	1	0	0	0	0	0	0	0	0
1063	Honest	-0.184196	-0.753704	1.23928	11.6628	0	0	1	1	0	1	0	0	0	1	0	0	0	1	0	0	0	0	0	0	0	0
1064	Honest	-0.0916264	2.69659	0.10603	17.7129	0	0	1	1	1	1	0	0	1	0	1	0	1	1	1	0	0	0	0	0	0	0
1065	Honest	0.432722	-0.118916	1.99358	8.45755	0	0	1	1	1	1	1	1	1	0	1	0	1	0	0	0	1	0	1	0	1	0
1066	Honest	-0.415831	0.202669	0.0114844	8.44719	0	0	0	1	1	1	1	0	1	1	1	0	1	0	1	1	0	0	0	0	0	0
1067	Honest	-0.299771	0.369969	2.02865	11.6318	0	0	1	1	1	0	1	1	1	1	1	1	1	0	1	0	0	0	1	0	0	0
1068	Honest	-2.78364	-0.436721	0.546816	12.0417	0	0	0	0	0	0	0	0	0	0	0	0	0	0	0	0	0	0	0	0	0	0
1069	Honest	0.827868	1.10237	0.681117	9.84714	0	0	1	0	1	1	1	1	1	1	1	1	1	1	0	0	1	1	0	0	0	0
1070	Honest	-0.654701	-1.10869	1.97991	7.0815	0	0	1	1	1	1	1	1	1	0	1	0	0	0	0	0	1	0	0	0	0	0
1071	Honest	-0.762031	-0.71926	1.68667	15.9027	0	0	1	1	1	0	0	1	1	1	0	0	1	0	0	0	0	0	0	1	0	0
1072	Honest	0.357714	2.17279	0.550247	12.6801	0	0	1	1	1	0	1	1	1	1	1	1	0	0	1	0	0	0	0	1	0	0
1073	Honest	0.37678	-1.08591	2.05901	6.25135	0	0	1	1	1	0	1	1	0	0	1	1	0	1	0	0	0	0	0	0	0	0
1074	Honest	0.479756	-0.188217	0.838174	7.75555	0	0	1	1	0	1	1	1	1	1	0	1	1	1	0	0	0	0	0	0	0	0
1075	Honest	1.06516	0.207368	1.06275	14.5235	0	0	0	1	1	1	1	1	1	1	1	1	0	0	1	1	1	0	0	1	1	0
1076	Honest	0.215961	0.90139	0.0180425	15.3948	0	0	1	1	1	1	0	1	1	1	0	1	0	0	1	0	1	0	1	0	0	0
1077	Honest	0.560376	1.26896	0.51208	12.0572	0	0	1	1	1	1	1	1	1	1	1	0	0	1	1	0	0	0	0	1	0	0
1078	Honest	0.826608	0.834386	0.705632	12.4246	0	0	1	1	1	1	1	1	1	0	0	1	1	0	0	0	0	0	1	0	0	0
1079	Honest	1.24781	1.29371	0.735715	12.1987	0	0	1	1	1	1	0	1	1	1	1	1	1	1	1	1	0	1	1	0	1	0
1080	Honest	-0.174624	0.791607	1.39256	12.0811	0	0	1	0	0	1	1	1	1	1	0	0	0	0	0	0	0	1	0	0	0	0
1081	Mild_Aberrant	-1.56365	-0.976136	1.01908	15.8933	0.221596	1	1	1	1	1	0	0	0	0	0	0	1	0	0	0	0	0	0	1	0	0
1082	Mild_Aberrant	-0.886705	0.861242	1.38006	13.7212	0.299103	1	1	0	1	0	1	0	0	1	0	0	0	0	0	0	0	0	0	0	0	0
1083	Mild_Aberrant	-0.22598	-1.24067	1.00832	10.5392	0.257738	1	1	1	1	1	1	1	0	1	0	1	0	1	0	0	1	0	0	0	0	0
1084	Mild_Aberrant	0.0832989	-0.849341	1.6232	18.0524	0.300527	1	1	1	1	1	1	1	0	0	0	0	1	0	0	0	1	0	0	1	0	1
1085	Mild_Aberrant	1.02902	-2.12737	0.744904	12.1798	0.276059	1	1	1	1	1	1	1	1	1	0	1	1	1	0	1	0	0	0	0	0	1
1086	Mild_Aberrant	-0.686465	0.586533	0.660385	16.9943	0.349722	1	1	1	1	1	1	0	0	1	0	0	0	0	0	0	0	0	0	0	0	0
1087	Mild_Aberrant	-0.18953	0.907587	0.503794	16.3111	0.174751	1	1	1	1	1	1	1	1	1	1	0	1	1	1	0	0	1	0	0	0	0
1088	Mild_Aberrant	-0.762991	-1.53227	1.92443	9.69022	0.199835	1	1	0	1	1	0	1	1	0	0	0	0	0	0	0	0	0	0	0	1	0
1089	Mild_Aberrant	-1.30197	-1.61387	2.10217	7.47756	0.275118	1	0	0	1	1	1	1	1	1	0	0	0	0	0	0	0	0	0	0	0	1
1090	Mild_Aberrant	1.1555	-1.06728	1.52926	19.7702	0.205368	1	1	1	1	1	1	1	1	1	1	1	1	0	0	1	1	0	0	0	1	0
1091	Mild_Aberrant	-0.837238	-1.85164	0.842694	7.25362	0.17282	1	1	0	1	1	1	1	0	0	0	0	1	1	0	0	0	0	0	0	0	0
1092	Mild_Aberrant	-0.450381	-0.859846	1.01211	10.8227	0.295776	1	1	0	1	0	0	1	0	1	0	1	0	1	1	1	0	0	0	0	0	0
1093	Mild_Aberrant	0.978411	0.569753	0.181109	7.01872	0.171879	1	1	1	1	1	1	1	1	1	1	0	1	1	1	1	0	0	0	0	0	1
1094	Mild_Aberrant	-0.167748	-1.10453	1.71327	9.54617	0.30168	1	1	0	1	1	0	1	1	0	0	0	0	0	0	0	0	0	0	0	0	0
1095	Mild_Aberrant	0.0248107	-1.92304	1.6187	8.95852	0.211901	1	1	1	1	0	0	1	0	1	0	1	1	0	0	0	0	0	1	1	0	0
1096	Mild_Aberrant	-1.71087	-2.10023	1.68246	10.2272	0.188617	1	1	1	0	1	1	0	0	0	1	0	0	0	0	0	0	0	0	0	0	0
1097	Mild_Aberrant	-0.158809	-0.495251	1.09446	12.0657	0.225038	1	1	1	1	1	1	1	1	1	1	1	0	0	1	0	0	0	0	0	0	0
1098	Mild_Aberrant	0.0128056	-0.63601	2.02518	20.2642	0.291169	1	1	1	1	1	1	1	1	1	1	0	0	0	0	0	0	0	0	1	0	0
1099	Mild_Aberrant	-0.111507	1.33155	0.847503	4.64219	0.204558	1	1	1	1	1	0	1	1	1	0	0	0	0	0	0	1	0	0	0	0	0
1100	Mild_Aberrant	0.508815	0.244029	0	6.53726	0.311204	1	1	1	1	1	0	1	1	1	0	0	1	1	0	0	1	0	1	1	0	0
1101	Mild_Aberrant	0.903781	-1.2863	1.72513	2.61739	0.183731	1	1	1	1	1	1	1	1	1	0	1	1	1	1	0	0	0	1	1	0	0
1102	Mild_Aberrant	3.03226	-0.906494	1.24326	16.4241	0.234635	1	1	1	1	1	1	1	1	1	1	1	1	1	1	1	1	1	1	1	1	1
1103	Mild_Aberrant	0.610858	1.01433	0.959866	7.65778	0.170717	1	1	1	1	1	1	0	0	1	1	1	1	1	1	0	0	0	0	0	0	0
1104	Mild_Aberrant	-1.31795	-2.36649	1.28556	9.6525	0.324851	1	0	0	0	1	1	1	0	1	0	0	0	1	0	0	0	0	0	0	0	0
1105	Mild_Aberrant	1.88652	-0.899007	0.484647	13.4439	0.233607	1	1	1	1	1	1	1	1	1	1	1	1	1	1	1	1	1	1	1	0	1
1106	Mild_Aberrant	0.950224	-0.524277	1.23138	15.6922	0.168468	1	1	1	1	1	0	1	1	1	1	1	1	1	1	0	0	0	0	1	0	1
1107	Mild_Aberrant	1.79709	-0.797196	1.4995	16.9509	0.243418	1	1	1	1	1	1	1	1	1	1	1	1	1	1	1	1	1	1	1	1	0
1108	Mild_Aberrant	-0.300535	-0.73466	0.430004	6.70956	0.299413	1	1	1	0	1	0	1	1	0	1	0	0	1	0	1	1	0	0	1	0	0
1109	Mild_Aberrant	0.854676	1.36879	1.4504	7.26794	0.253279	1	1	1	1	1	1	1	1	1	1	1	1	1	0	1	0	0	0	1	1	0
1110	Mild_Aberrant	-1.1648	-1.57622	0.489671	8.9519	0.34887	1	1	1	0	0	1	0	1	0	0	0	0	0	0	0	0	0	0	0	0	0
1111	Mild_Aberrant	-0.539625	-0.474806	1.23392	15.5517	0.19004	1	1	0	1	1	0	0	1	0	0	1	0	0	0	0	0	0	0	0	0	0
1112	Mild_Aberrant	0.493264	-1.25979	1.03489	15.6296	0.222718	1	1	0	1	1	1	1	0	1	1	1	1	0	0	0	1	0	0	1	0	0
1113	Mild_Aberrant	-0.28015	0.130517	0.0723502	16.1966	0.308271	1	1	1	1	1	1	1	1	1	1	0	0	0	0	0	0	0	0	0	0	0
1114	Mild_Aberrant	1.39467	-0.21579	1.85376	13.3399	0.284553	1	1	1	1	1	1	1	1	1	1	1	1	1	1	1	0	1	0	0	0	0
1115	Mild_Aberrant	1.01979	-0.185333	0.760717	13.2452	0.253229	1	1	1	1	1	1	1	1	1	1	1	1	0	0	0	1	0	0	0	0	0
1116	Mild_Aberrant	0.241692	0.366264	1.01842	16.6738	0.224604	1	1	1	1	1	1	1	1	1	0	1	1	0	0	0	1	0	1	0	0	0
1117	Mild_Aberrant	0.0522665	0.0810094	1.15812	20.4238	0.279819	1	1	1	1	1	1	0	0	1	1	1	0	0	1	1	0	0	0	1	0	0
1118	Mild_Aberrant	-0.35948	-1.5422	0.669461	7.04974	0.313607	1	1	1	0	0	1	1	1	1	0	0	1	0	0	0	0	0	0	0	0	0
1119	Mild_Aberrant	0.382125	-0.375265	1.2344	5.95464	0.183345	1	1	0	1	1	0	1	1	1	1	1	0	0	0	0	0	1	0	0	1	0
1120	Mild_Aberrant	0.445315	0.0381952	1.29694	9.41881	0.154023	1	1	1	1	1	1	1	0	1	0	1	0	1	1	0	0	0	0	1	0	0
1121	Mild_Aberrant	-0.627286	-0.826671	0	8.61952	0.281675	1	1	1	0	0	1	0	0	1	0	0	1	0	0	0	0	0	0	0	0	0
1122	Mild_Aberrant	-1.28888	-1.06757	1.93124	8.81585	0.31858	1	0	1	0	1	0	1	1	0	1	0	0	0	1	1	0	0	0	0	0	0
1123	Mild_Aberrant	0.319326	-1.39514	1.20198	8.54619	0.183027	1	1	0	1	1	1	1	1	1	1	1	0	0	0	1	0	0	0	1	0	0
1124	Mild_Aberrant	-0.566261	-0.807749	1.26981	14.0731	0.237492	1	1	0	1	1	0	0	0	1	0	1	0	1	1	0	0	0	0	0	0	0
1125	Mild_Aberrant	0.589146	-0.499138	2.02285	16.1228	0.157102	1	1	1	1	1	0	1	0	0	1	1	1	1	0	1	1	0	1	1	1	0
1126	Mild_Aberrant	-0.284568	1.31287	1.3399	5.76622	0.246315	1	1	1	1	1	1	1	1	0	0	0	1	0	0	0	0	1	0	0	0	0
1127	Mild_Aberrant	0.0261298	-0.358698	1.37369	7.14769	0.336278	1	1	1	1	1	1	1	0	1	1	1	0	0	0	0	1	0	0	1	0	0
1128	Mild_Aberrant	-0.517174	0.483827	1.11013	11.3221	0.180423	1	1	1	0	1	1	1	1	1	1	1	0	1	0	0	1	0	0	0	0	0
1129	Mild_Aberrant	-0.546093	-1.79136	2.10341	6.00259	0.319998	1	1	0	1	0	0	0	1	0	0	1	0	0	0	0	0	0	0	0	0	0
1130	Mild_Aberrant	1.0821	0.0720861	0.947169	13.2293	0.18468	1	1	1	1	1	1	1	1	1	1	1	1	0	1	1	0	1	0	0	0	0
1131	Mild_Aberrant	-1.55614	-0.0430075	0.866363	13.284	0.265033	1	0	1	0	1	1	1	0	0	0	0	0	0	0	1	0	0	0	1	0	0
1132	Mild_Aberrant	1.34716	1.47357	0	13.9196	0.159128	1	1	1	1	1	1	1	1	1	1	1	1	1	0	1	1	1	0	1	0	0
1133	Mild_Aberrant	-0.509493	-1.04944	0.768162	8.77177	0.240259	1	1	1	1	0	0	0	0	1	0	0	0	0	0	0	0	0	0	0	0	0
1134	Mild_Aberrant	-0.297346	-0.277161	1.55493	9.08947	0.168018	1	1	1	1	1	1	0	1	1	0	0	1	0	0	0	0	1	0	0	1	0
1135	Mild_Aberrant	-0.102647	0.0817974	2.16726	16.741	0.185845	1	1	0	1	1	1	1	0	1	1	1	1	0	0	0	0	0	0	0	0	0
1136	Mild_Aberrant	0.804455	-0.438966	0.555082	11.0588	0.295976	1	1	1	1	1	1	1	1	0	1	1	0	1	0	0	0	0	0	1	1	0
1137	Mild_Aberrant	-0.215755	-0.73378	1.52661	7.67447	0.191594	1	1	1	1	1	1	0	1	1	0	1	0	1	0	0	0	0	0	0	0	0
1138	Mild_Aberrant	-0.770247	-0.955444	1.62014	7.3279	0.170662	1	1	0	1	1	0	1	1	0	1	1	0	1	0	0	0	0	0	0	0	0
1139	Mild_Aberrant	0.122632	-1.5724	0.539932	10.8075	0.247043	1	1	1	0	1	1	1	1	1	1	1	0	0	1	1	1	0	0	0	0	0
1140	Mild_Aberrant	0.164534	-1.03074	0.512769	16.4687	0.211975	1	1	1	1	1	0	1	1	1	0	0	1	0	1	1	0	0	1	1	1	0
1141	Moderate_Aberrant	-0.137151	-0.764426	1.65837	12.517	0.520651	1	1	1	1	1	1	1	1	1	1	1	1	1	0	0	1	0	0	0	0	0
1142	Moderate_Aberrant	0.28549	-0.544021	2.14946	14.3972	0.444816	1	1	0	1	1	1	1	1	1	1	0	1	0	0	0	0	0	0	0	0	0
1143	Moderate_Aberrant	-1.39046	-0.969144	1.44571	9.84643	0.482642	1	0	0	1	1	1	0	1	0	0	0	0	0	0	0	0	0	0	0	0	0
1144	Moderate_Aberrant	0.140008	-0.269631	2.21373	15.0983	0.542945	1	1	1	1	1	0	1	0	0	1	1	1	0	1	1	1	0	1	0	0	0
1145	Moderate_Aberrant	-2.05836	-2.20347	1.94938	2.10083	0.579656	1	1	0	0	0	0	0	1	0	1	0	0	0	0	0	0	0	0	0	0	0
1146	Moderate_Aberrant	0.34168	-1.34539	0.825435	4.28623	0.453032	1	1	1	1	1	1	0	1	0	0	0	0	0	0	1	1	1	0	0	0	0
1147	Moderate_Aberrant	0.426884	-2.41608	2.30012	11.4501	0.450532	1	1	1	1	1	1	0	0	1	1	1	1	0	1	1	1	0	1	0	0	0
1148	Moderate_Aberrant	-1.1271	-1.43443	1.86281	12.4913	0.528497	1	1	0	1	1	1	1	0	0	1	0	1	0	0	0	0	0	0	0	0	0
1149	Moderate_Aberrant	0.71727	-1.36463	1.64208	12.4146	0.492161	1	1	1	1	0	1	1	1	1	0	1	1	0	1	1	0	0	1	0	0	0
1150	Moderate_Aberrant	-1.36122	-1.27695	1.53745	13.3446	0.497346	1	1	0	1	0	1	0	0	0	1	0	0	0	0	1	0	0	0	1	0	1
1151	Moderate_Aberrant	1.74377	-1.39561	0.866741	13.8173	0.496995	1	1	1	1	1	0	1	1	1	1	1	1	1	1	1	1	1	1	1	1	1
1152	Moderate_Aberrant	0.726271	-1.90102	1.74235	14.3607	0.468073	1	1	0	1	1	1	0	1	1	1	1	1	1	1	1	1	0	0	0	0	0
1153	Moderate_Aberrant	-1.88611	-1.64143	1.94417	11.7216	0.434638	1	1	1	0	0	0	0	1	0	0	1	0	0	0	0	0	0	0	0	0	1
1154	Moderate_Aberrant	0.667794	-0.480657	0	13.1506	0.491937	1	1	1	1	1	1	0	1	1	1	0	0	0	1	1	1	0	1	1	1	0
1155	Moderate_Aberrant	0.65562	-1.66274	1.49294	6.26236	0.691084	1	1	1	1	1	0	1	0	0	1	1	1	1	1	0	1	0	1	1	0	0
1156	Moderate_Aberrant	-1.34542	-1.75765	1.511	9.59905	0.630244	1	0	1	1	1	1	1	1	1	0	0	0	0	0	0	0	0	1	0	0	0
1157	Moderate_Aberrant	-0.516318	-2.01357	0.781846	12.2539	0.498312	1	1	1	1	0	0	0	1	0	1	0	0	1	0	0	0	0	0	0	0	0
1158	Moderate_Aberrant	-1.81275	-0.965234	0.518431	4.23733	0.46529	1	1	1	1	0	0	0	0	0	0	0	0	0	0	0	0	0	0	0	0	0
1159	Moderate_Aberrant	1.41668	-2.04093	2.40193	11.6517	0.630107	1	1	1	1	1	1	1	1	1	1	1	1	1	0	1	1	1	0	1	1	0
1160	Moderate_Aberrant	1.25545	-1.8128	1.34045	7.14469	0.482992	1	1	1	1	0	1	1	1	1	1	1	1	0	1	1	0	0	1	0	0	1
1161	Moderate_Aberrant	-0.142899	-2.73837	1.42163	6.9415	0.680673	1	1	1	1	1	1	0	1	1	0	1	0	1	0	0	0	0	0	0	0	0
1162	Moderate_Aberrant	0.116968	-1.40084	1.71439	9.10378	0.442958	1	1	1	1	1	0	0	1	0	1	1	0	1	1	0	1	1	0	0	0	0
1163	Moderate_Aberrant	0.125524	-0.858006	1.76299	16.6246	0.486628	1	1	1	1	1	1	1	0	1	1	1	1	0	0	0	1	0	0	0	0	0
1164	Moderate_Aberrant	-1.34496	-2.77576	1.97983	15.6881	0.550259	1	1	1	0	0	0	0	0	1	0	0	0	0	0	0	0	0	0	0	0	0
1165	Moderate_Aberrant	-0.304751	-2.56454	2.29504	14.2039	0.618459	1	1	1	1	1	1	1	1	1	0	0	1	1	0	0	0	0	0	0	0	0
1166	Moderate_Aberrant	2.03628	-1.03556	1.60632	21.6989	0.402593	1	1	1	1	1	1	1	1	1	1	1	1	1	1	1	1	1	1	0	1	1
1167	Moderate_Aberrant	0.989263	0.453488	1.16737	16.0413	0.484979	1	1	1	1	1	1	1	1	1	1	1	1	1	1	0	1	1	0	0	0	0
1168	Moderate_Aberrant	-1.01035	-0.0814242	2.02126	17.0013	0.427979	1	1	0	1	1	1	0	0	0	1	0	0	0	0	0	0	0	0	1	0	0
1169	Moderate_Aberrant	0.0328241	-0.296312	1.51374	10.716	0.663846	1	1	1	1	1	1	1	1	0	0	1	1	1	1	0	0	0	0	0	0	0
1170	Moderate_Aberrant	-0.286182	-2.21461	0.836081	8.17368	0.449584	1	0	1	1	1	1	1	1	1	0	1	0	1	0	0	1	0	0	0	0	0
1171	Moderate_Aberrant	-0.319123	-1.35885	2.21719	17.0986	0.425059	1	1	1	1	1	1	1	1	1	0	1	1	0	0	0	0	0	0	0	0	0
1172	Moderate_Aberrant	1.07642	0.0961862	0.631674	12.2121	0.441191	1	1	1	1	1	1	1	1	1	1	1	1	1	1	1	1	1	1	0	0	0
1173	Moderate_Aberrant	0.230257	-1.74447	0.969863	18.2025	0.549679	1	1	0	1	1	1	1	1	1	0	0	1	1	0	0	0	0	1	0	0	0
1174	Moderate_Aberrant	-0.729108	-1.24278	1.26247	10.776	0.403379	1	1	1	1	1	1	0	1	0	0	0	0	0	0	0	1	1	1	0	0	0
1175	Moderate_Aberrant	1.24115	-2.44521	1.19039	7.30765	0.612971	1	1	1	1	1	1	1	1	1	1	0	1	1	1	0	1	1	0	0	1	0
1176	Moderate_Aberrant	0.0718687	-1.1798	1.67506	13.9907	0.648232	1	1	1	0	0	1	1	1	0	0	1	0	1	0	0	0	0	0	1	0	0
1177	Severe_Aberrant	2.14532	-0.615462	3.16336	3.77848	0.791339	1	1	1	1	1	1	1	1	1	1	1	1	1	1	1	1	1	1	1	0	1
1178	Severe_Aberrant	0.353098	-0.361129	1.9491	13.8903	0.964387	1	1	0	1	0	1	1	1	1	1	1	0	0	1	1	1	0	0	0	0	0
1179	Severe_Aberrant	-1.34892	0.09117	1.23115	10.2078	0.871287	1	1	0	0	0	1	1	1	1	0	0	0	0	0	0	0	0	0	0	0	0
1180	Severe_Aberrant	2.90901	-0.283413	2.01396	10.3659	0.888153	1	1	1	1	1	1	1	1	1	1	1	1	1	1	1	1	1	1	1	1	1
1181	Severe_Aberrant	-0.390859	-2.15612	3.15742	12.5257	0.856875	1	1	1	1	1	1	1	1	0	1	0	0	1	0	1	0	0	1	0	0	0
1182	Severe_Aberrant	0.582716	-1.31539	1.99314	9.34284	0.973105	1	1	0	1	1	1	1	1	1	1	1	1	0	1	1	0	1	0	0	0	0
1183	Severe_Aberrant	-0.101547	0.156874	1.6826	14.9844	0.878538	1	1	0	1	1	1	1	1	0	0	0	1	0	0	0	0	0	0	0	1	0
1184	Severe_Aberrant	-0.864318	-0.876654	1.6679	12.6809	0.868748	1	0	1	0	1	0	1	0	1	0	0	0	0	0	0	0	0	0	0	0	0
1185	Severe_Aberrant	1.83291	-1.95045	2.40532	9.50686	0.856557	1	1	1	1	1	1	1	1	1	1	1	1	1	1	1	1	1	0	0	0	0
1186	Severe_Aberrant	-1.56751	-2.30456	2.21036	9.10995	0.78132	1	1	0	1	0	0	0	1	0	0	0	0	0	0	0	1	0	0	1	0	0
1187	Severe_Aberrant	-0.845848	-2.80898	2.34442	6.78647	0.802598	1	1	0	1	1	1	0	1	0	1	0	0	0	1	0	0	0	0	0	0	0
1188	Severe_Aberrant	0.596574	-3.59799	2.05783	11.9115	0.918566	1	1	1	1	1	0	1	1	1	0	0	0	1	0	1	1	0	1	0	0	0
1189	Severe_Aberrant	1.8163	-1.15874	1.60994	5.96392	0.876842	1	1	1	1	1	1	1	1	1	1	1	1	1	1	1	1	1	0	0	0	1
1190	Severe_Aberrant	0.204778	-2.54538	2.59269	11.2558	0.957242	1	1	0	1	0	1	1	1	0	0	1	0	0	1	1	0	1	0	1	0	1
1191	Severe_Aberrant	-0.0698537	-2.48096	2.76657	14.1013	0.985042	1	1	1	1	0	1	1	1	1	1	1	1	0	0	1	1	0	0	0	1	0
1192	Severe_Aberrant	-1.06407	-2.75581	1.98576	5.29478	0.952317	1	1	1	1	0	1	1	1	0	0	0	0	1	1	0	0	0	0	0	0	0
1193	Severe_Aberrant	0.460827	-2.03596	2.61037	4.23859	0.909234	1	1	1	1	1	0	1	1	1	1	0	1	1	0	1	1	0	1	1	1	1
1194	Severe_Aberrant	0.0574747	-1.78497	1.88838	7.09687	0.932466	1	1	1	1	0	1	1	1	1	0	0	1	0	1	0	0	0	1	0	1	1
1195	Severe_Aberrant	0.74631	-2.24551	2.31526	15.4694	0.907627	1	1	1	1	1	1	1	1	1	0	1	1	1	1	1	0	0	1	0	1	0
1196	Severe_Aberrant	-1.84379	-1.66565	2.01338	8.78209	0.819941	1	0	1	0	0	0	0	0	0	0	0	0	0	0	0	0	1	1	1	0	0
1197	Severe_Aberrant	-0.455918	-2.0227	1.6655	11.4011	0.921091	1	1	1	1	1	1	1	1	0	0	0	0	0	0	0	0	1	1	0	1	0
1198	Severe_Aberrant	0.471675	-2.86894	2.35922	11.8405	0.781213	1	1	1	1	1	1	1	1	1	1	1	1	1	0	0	0	0	0	0	0	0
1199	Severe_Aberrant	-1.88665	-2.91867	2.08522	2.90969	0.76383	1	1	0	0	0	0	0	1	1	0	0	0	0	0	0	0	0	0	0	0	0
1200	Severe_Aberrant	-1.18957	-2.3607	2.74092	5.88857	0.949504	1	0	1	1	1	0	0	1	0	0	0	1	1	0	0	0	0	0	0	0	0
