# Supplementary material
Source: Research Square preprint supplement (doi:10.21203/rs.3.rs-10045621/v1)
Supplement: Supplementary file 1 [file e061c1d4ed00e9304c809572.pdf]

```

#####
# EIT PROJECT
# Syntax v4.1
#####

required_packages <- c(
  "readxl",
  "tidyverse",
  "randomForest",
  "xgboost",
  "pROC",
  "PRROC",
  "yardstick",
  "shapviz"
)

for(pkg in required_packages){

  if(!require(pkg,
               character.only = TRUE)){

    install.packages(pkg)

    library(pkg,
              character.only = TRUE)
  }
}

set.seed(2026)

#####
# IMPORT DATA
#####

Data <- read_excel(
  "E:/my File/Publikasi Artikel/Education and Information Technologies
Q1/Simulation_v4_Final_EIT.xlsx",
  sheet = "Simulation_v4"
)

Data <- as.data.frame(Data)

#####
# OUTCOME
#####

Data$class <- factor(
  ifelse(
    Data$cheater_status == 1,
    "Cheater",
    "Normal"
  ),
  levels = c(
    "Cheater",
    "Normal"
  )
)

```

```

)
)

table(Data$Class)

#####
# SPLIT
#####

set.seed(2026)

idx <- sample(
  1:nrow(Data),
  size = 0.80*nrow(Data)
)

Train <- Data[idx,]
Test  <- Data[-idx,]

table(Train$Class)

table(Test$Class)

#####
# FEATURE SETS
#####

FS1 <- c(
  "theta",
  "lz"
)

FS2 <- c(
  "mean_rt"
)

FS3 <- c(
  "theta",
  "lz",
  "mean_rt"
)

FS4 <- c(
  "theta",
  "lz",
  "anomaly_score",
  "mean_rt"
)

Run_GLM <- function(features){

  Formula <- as.formula(

    paste(
      "Class ~",

```

```

        paste(features,
              collapse = " + ")
    )
)

glm(
  Formula,
  data = Train,
  family = binomial
)
}

GLM_FS1 <- Run_GLM(FS1)

GLM_FS2 <- Run_GLM(FS2)

GLM_FS3 <- Run_GLM(FS3)

GLM_FS4 <- Run_GLM(FS4)

Run_RF <- function(features){
  Formula <- as.formula(
    paste(
      "Class ~",
      paste(features,
            collapse = " + ")
    )
  )

  randomForest(
    Formula,
    data = Train,

    ntree = 500,

    importance = TRUE
  )
}

RF_FS1 <- Run_RF(FS1)

RF_FS3 <- Run_RF(FS3)

RF_FS4 <- Run_RF(FS4)

Run_XGB <- function(features){
  X_train <- as.matrix(
    Train[,features,
          drop = FALSE]
  )

  y_train <- as.integer(

```

```

    Train$class == "Cheater"
  )

dtrain <- xgb.DMatrix(
  data = X_train,
  label = y_train
)

params <- list(
  objective = "binary:logistic",
  eval_metric = "auc",
  max_depth = 3,
  learning_rate = 0.05,
  subsample = 0.8,
  colsample_bytree = 0.8
)

Model <- xgb.train(
  params = params,
  data = dtrain,
  nrounds = 200
)

return(Model)
}

XGB_FS1 <- Run_XGB(FS1)

XGB_FS3 <- Run_XGB(FS3)

XGB_FS4 <- Run_XGB(FS4)

Evaluate_Model <- function(
  Prob,
  Truth
){
  ROC <- roc(
    Truth,
    Prob
  )

  ROC_AUC <- as.numeric(
    auc(ROC)
  )
}

```

```

Pred <- ifelse(
  Prob > 0.50,
  1,
  0
)

TP <- sum(
  Pred==1 &
  Truth==1
)

TN <- sum(
  Pred==0 &
  Truth==0
)

FP <- sum(
  Pred==1 &
  Truth==0
)

FN <- sum(
  Pred==0 &
  Truth==1
)

Precision <-
  TP/(TP+FP)

Recall <-
  TP/(TP+FN)

F1 <-
  2*Precision*Recall/
  (Precision+Recall)

BACC <-
  ((TP/(TP+FN))+
  (TN/(TN+FP)))/2

data.frame(
  ROC_AUC,
  Precision,
  Recall,
  F1,
  BACC
)
}

y_test <- ifelse(
  Test$Class=="Cheater",
  1,
  0
)

```

```
Prob_GLM_FS1 <-  
  predict(  
    GLM_FS1,  
    Test,  
    type="response"  
  )
```

```
Prob_GLM_FS2 <-  
  predict(  
    GLM_FS2,  
    Test,  
    type="response"  
  )
```

```
Prob_GLM_FS3 <-  
  predict(  
    GLM_FS3,  
    Test,  
    type="response"  
  )
```

```
Prob_GLM_FS4 <-  
  predict(  
    GLM_FS4,  
    Test,  
    type="response"  
  )
```

```
Evaluate_Model(  
  Prob_GLM_FS1,  
  y_test  
)
```

```
Evaluate_Model(  
  Prob_GLM_FS2,  
  y_test  
)
```

```
Evaluate_Model(  
  Prob_GLM_FS3,  
  y_test  
)
```

```
Evaluate_Model(  
  Prob_GLM_FS4,  
  y_test  
)
```

```
Prob_RF_FS1 <-  
  predict(  
    RF_FS1,  
    Test,  
    type="prob"  
  )[, "Cheater"]
```

```

Prob_RF_FS3 <-
  predict(
    RF_FS3,
    Test,
    type="prob"
  )[, "Cheater"]

Prob_RF_FS4 <-
  predict(
    RF_FS4,
    Test,
    type="prob"
  )[, "Cheater"]

Evaluate_Model(
  Prob_RF_FS1,
  y_test
)

Evaluate_Model(
  Prob_RF_FS3,
  y_test
)

Evaluate_Model(
  Prob_RF_FS4,
  y_test
)

Pred_XGB_FS1 <-
  predict(
    XGB_FS1,

    xgb.DMatrix(
      as.matrix(
        Test[,FS1]
      )
    )
  )

Pred_XGB_FS3 <-
  predict(
    XGB_FS3,

    xgb.DMatrix(
      as.matrix(
        Test[,FS3]
      )
    )
  )

Pred_XGB_FS4 <-
  predict(
    XGB_FS4,

```

```

    xgb.DMatrix(
      as.matrix(
        Test[,FS4]
      )
    )
  )
)

Evaluate_Model(
  Pred_XGB_FS1,
  y_test
)

Evaluate_Model(
  Pred_XGB_FS3,
  y_test
)

Evaluate_Model(
  Pred_XGB_FS4,
  y_test
)

Results <- rbind(

  cbind(
    Model="GLM_FS1",
    Evaluate_Model(
      Prob_GLM_FS1,
      y_test
    )
  ),

  cbind(
    Model="GLM_FS2",
    Evaluate_Model(
      Prob_GLM_FS2,
      y_test
    )
  ),

  cbind(
    Model="GLM_FS3",
    Evaluate_Model(
      Prob_GLM_FS3,
      y_test
    )
  ),

  cbind(
    Model="GLM_FS4",
    Evaluate_Model(
      Prob_GLM_FS4,
      y_test
    )
  ),
)

```

```
cbind(  
  Model="RF_FS1",  
  Evaluate_Model(  
    Prob_RF_FS1,  
    y_test  
  )  
),  
  
cbind(  
  Model="RF_FS3",  
  Evaluate_Model(  
    Prob_RF_FS3,  
    y_test  
  )  
),  
  
cbind(  
  Model="RF_FS4",  
  Evaluate_Model(  
    Prob_RF_FS4,  
    y_test  
  )  
),  
  
cbind(  
  Model="XGB_FS1",  
  Evaluate_Model(  
    Pred_XGB_FS1,  
    y_test  
  )  
),  
  
cbind(  
  Model="XGB_FS3",  
  Evaluate_Model(  
    Pred_XGB_FS3,  
    y_test  
  )  
),  
  
cbind(  
  Model="XGB_FS4",  
  Evaluate_Model(  
    Pred_XGB_FS4,  
    y_test  
  )  
)  
)
```

Results

```
str(Data)
```

```

####
##Script FInal

#####
# EIT PROJECT
# Production Script v5.0
# Part A - Data Audit
#####

required_packages <- c(
  "readxl",
  "tidyverse",
  "caret",
  "pROC",
  "PRROC",
  "psych",
  "corrplot",
  "openxlsx"
)

for(pkg in required_packages){
  if(!require(pkg, character.only = TRUE)){
    install.packages(pkg)
    library(pkg, character.only = TRUE)
  }
}

set.seed(2026)

#####
# IMPORT DATA
#####

Data <- read_excel(
  "E:/my File/Publikasi Artikel/Education and Information Technologies
Q1/Simulation_v4_Final_EIT.xlsx",
  sheet = "Simulation_v4"
)

Data <- as.data.frame(Data)

str(Data)

#####
# OUTCOME
#####

Data$Class <- factor(
  ifelse(
    Data$cheater_status == 1,
    "Cheater",
    "Normal"
  )
)

```

```

    ),
    levels = c(
      "Normal",
      "Cheater"
    )
  )
)

levels = c(
  "Normal",
  "Cheater"
)

table(Data$Class)

prop.table(
  table(Data$Class)
)

#####
# TABLE 1
#####

Table1 <- psych::describe(

  Data[,c(
    "theta",
    "lz",
    "anomaly_score",
    "mean_rt"
  )]
)

Table1

#####
# TABLE 2
#####

CorMatrix <- cor(

  Data[,c(
    "theta",
    "lz",
    "anomaly_score",
    "mean_rt"
  )]
)

round(CorMatrix,3)

corrplot(

```

```
CorMatrix,  
method = "color",  
addCoef.col = "black"  
)
```

```
#####  
# FIGURE 1  
#####
```

```
ggplot(  
  Data,  
  aes(theta)  
) +  
  geom_histogram(  
    bins = 30  
  ) +  
  theme_bw()
```

```
#####  
# FIGURE 2  
#####
```

```
ggplot(  
  Data,  
  aes(lz)  
) +  
  geom_histogram(  
    bins = 30  
  ) +  
  theme_bw()
```

```
#####  
# FIGURE 3  
#####
```

```
ggplot(  
  Data,  
  aes(mean_rt)  
) +  
  geom_histogram(  
    bins = 30  
  ) +  
  theme_bw()
```

```
#####  
# FIGURE 4  
#####
```

```
ggplot(  
  Data,  
  aes(anomaly_score)  
) +  
  geom_histogram(  
    bins = 30  
  )
```

```

)+
theme_bw()

#####
# STRATIFIED SPLIT
#####

set.seed(2026)

Index <- createDataPartition(
  Data$Class,
  p = 0.80,
  list = FALSE
)

Train <- Data[Index,]

Test <- Data[-Index,]

table(Train$Class)

table(Test$Class)

#####
# FEATURE SETS
#####

FS1 <- c(
  "theta",
  "lz"
)

FS2 <- c(
  "mean_rt"
)

FS3 <- c(
  "theta",
  "lz",
  "mean_rt"
)

FS4 <- c(
  "theta",
  "lz",
  "anomaly_score",
  "mean_rt"
)

#####
# METRICS
#####

Evaluate_Model <- function(

```

```
    Prob,
    Truth
){

  Prob <- as.numeric(
    unlist(Prob)
  )

  Truth <- as.numeric(
    Truth
  )

  ROCobj <- roc(
    Truth,
    Prob
  )

  ROC_AUC <- as.numeric(
    auc(ROCobj)
  )

  Best <- coords(
    ROCobj,
    "best",
    ret = "threshold"
  )

  Threshold <- min(
    Best$threshold
  )

  Pred <- ifelse(
    Prob >= Threshold,
    1,
    0
  )

  TP <- sum(
    Pred==1 &
    Truth==1
  )

  TN <- sum(
    Pred==0 &
    Truth==0
  )

  FP <- sum(
    Pred==1 &
    Truth==0
  )

  FN <- sum(
    Pred==0 &
    Truth==1
  )
```

```

)
Precision <- TP/(TP+FP)
Recall <- TP/(TP+FN)
F1 <- 2*Precision*Recall/
(Precision+Recall)
Denom <- sqrt(
  (TP+FP)*
  (TP+FN)*
  (TN+FP)*
  (TN+FN)
)
if(Denom==0){
  MCC <- 0
} else {
  MCC <- (
    (TP*TN) -
    (FP*FN)
  ) / Denom
}
BACC <- (
  (TP/(TP+FN)) +
  (TN/(TN+FP))
)/2
PR <- PRROC::pr.curve(
  scores.class0 =
    Prob[Truth==1],
  scores.class1 =
    Prob[Truth==0],
  curve = FALSE
)
PRAUC <- PR$auc.integral
data.frame(
  ROC_AUC,
  PRAUC,
  Precision,
  Recall,
  F1,
  MCC,
  BACC,

```

```

    Threshold
  )
}

Results_GLM
Results_RF
Results_XGB
Table4
#####
# GLM
#####

Run_GLM <- function(features){

  Formula <- as.formula(

    paste(
      "Class ~",
      paste(
        features,
        collapse = " + "
      )
    )
  )

  glm(
    Formula,
    data = Train,
    family = binomial
  )
}

GLM_FS1 <- Run_GLM(FS1)

GLM_FS2 <- Run_GLM(FS2)

GLM_FS3 <- Run_GLM(FS3)

GLM_FS4 <- Run_GLM(FS4)

y_test <- ifelse(
  Test$Class=="Cheater",
  1,
  0
)

P_GLM_FS1 <- predict(
  GLM_FS1,
  Test,
  type="response"
)

```

```
P_GLM_FS2 <- predict(  
  GLM_FS2,  
  Test,  
  type="response"  
)
```

```
P_GLM_FS3 <- predict(  
  GLM_FS3,  
  Test,  
  type="response"  
)
```

```
P_GLM_FS4 <- predict(  
  GLM_FS4,  
  Test,  
  type="response"  
)
```

```
Results_GLM <- rbind(  
  
  cbind(  
    Model="GLM_FS1",  
    Evaluate_Model(  
      P_GLM_FS1,  
      y_test  
    )  
  ),  
  
  cbind(  
    Model="GLM_FS2",  
    Evaluate_Model(  
      P_GLM_FS2,  
      y_test  
    )  
  ),  
  
  cbind(  
    Model="GLM_FS3",  
    Evaluate_Model(  
      P_GLM_FS3,  
      y_test  
    )  
  ),  
  
  cbind(  
    Model="GLM_FS4",  
    Evaluate_Model(  
      P_GLM_FS4,  
      y_test  
    )  
  )  
)
```

```
Results_GLM
```

```

summary(P_GLM_FS4)
quantile(
  P_GLM_FS4,
  probs = c(
    0,
    .25,
    .50,
    .75,
    .90,
    .95,
    .99,
    1
  )
)
hist(
  P_GLM_FS4,
  breaks = 30
)

levels(Data$Class)
table(Data$Class)

## SCRIPT LAANJUTAN

#####
# RANDOM FOREST
#####

library(randomForest)

Run_RF <- function(features){

  Formula <- as.formula(

    paste(
      "Class ~",
      paste(
        features,
        collapse = " + "
      )
    )
  )

  randomForest(

    Formula,

    data = Train,

    ntree = 1000,

    importance = TRUE,

    proximity = FALSE
  )
}

```

```

    )
  }

#####
# RF MODELS
#####

RF_FS1 <- Run_RF(FS1)

RF_FS3 <- Run_RF(FS3)

RF_FS4 <- Run_RF(FS4)

levels(Data$Class)

#####
# RF PREDICTIONS
#####

P_RF_FS1 <- as.numeric(

  predict(
    RF_FS1,
    Test,
    type = "prob"
  )[,"Cheater"]

)

P_RF_FS3 <- as.numeric(

  predict(
    RF_FS3,
    Test,
    type = "prob"
  )[,"Cheater"]

)

P_RF_FS4 <- as.numeric(

  predict(
    RF_FS4,
    Test,
    type = "prob"
  )[,"Cheater"]

)

#####
# RF RESULTS
#####

Results_RF <- rbind(

  cbind(

```

```

    Model = "RF_FS1",
    Evaluate_Model(
      P_RF_FS1,
      y_test
    )
  ),

  cbind(
    Model = "RF_FS3",
    Evaluate_Model(
      P_RF_FS3,
      y_test
    )
  ),

  cbind(
    Model = "RF_FS4",
    Evaluate_Model(
      P_RF_FS4,
      y_test
    )
  )
)

Results_RF

#####
# XGBOOST
#####

library(xgboost)

Run_XGB <- function(features){

  X_train <- as.matrix(
    Train[,features, drop = FALSE]
  )

  y_train <- ifelse(
    Train$Class == "Cheater",
    1,
    0
  )

  dtrain <- xgb.DMatrix(
    data = X_train,
    label = y_train
  )

  params <- list(

    objective = "binary:logistic",

```

```

    eval_metric = "auc",
    max_depth = 3,
    learning_rate = 0.05,
    subsample = 0.80,
    colsample_bytree = 0.80,
    min_child_weight = 5
  )
Model <- xgb.train(
  params = params,
  data = dtrain,
  nrounds = 300,
  verbose = 0
)
return(Model)
}

#####
# XGB MODELS
#####

XGB_FS1 <- Run_XGB(FS1)

XGB_FS3 <- Run_XGB(FS3)

XGB_FS4 <- Run_XGB(FS4)

#####
# XGB PREDICTIONS
#####

Pred_XGB <- function(model, features){
  dtest <- xgb.DMatrix(
    data = as.matrix(
      Test[,features, drop = FALSE]
    )
  )
  predict(
    model,
    dtest
  )
}

```

```
P_XGB_FS1 <- Pred_XGB(  
  XGB_FS1,  
  FS1  
)
```

```
P_XGB_FS3 <- Pred_XGB(  
  XGB_FS3,  
  FS3  
)
```

```
P_XGB_FS4 <- Pred_XGB(  
  XGB_FS4,  
  FS4  
)
```

```
#####  
# XGB RESULTS  
#####
```

```
Results_XGB <- rbind(  
  
  cbind(  
    Model = "XGB_FS1",  
    Evaluate_Model(  
      P_XGB_FS1,  
      y_test  
    )  
  ),  
  
  cbind(  
    Model = "XGB_FS3",  
    Evaluate_Model(  
      P_XGB_FS3,  
      y_test  
    )  
  ),  
  
  cbind(  
    Model = "XGB_FS4",  
    Evaluate_Model(  
      P_XGB_FS4,  
      y_test  
    )  
  )  
)
```

```
Results_XGB
```

```
#####  
# TABLE 4  
#####
```

```
Table4 <- rbind(  
  
  cbind(  
    Model = "XGB_FS1",  
    Evaluate_Model(  
      P_XGB_FS1,  
      y_test  
    )  
  ),  
  
  cbind(  
    Model = "XGB_FS3",  
    Evaluate_Model(  
      P_XGB_FS3,  
      y_test  
    )  
  ),  
  
  cbind(  
    Model = "XGB_FS4",  
    Evaluate_Model(  
      P_XGB_FS4,  
      y_test  
    )  
  )  
)
```

```

Results_GLM,

Results_RF,

Results_XGB

)

Table4

#####
# MODEL RANKING
#####

Table4[
  order(
    -as.numeric(
      Table4$ROC_AUC
    )
  ),
]

#####
# EXPORT
#####

openxlsx::write.xlsx(

  list(

    Table1 = Table1,

    Table2 = CorMatrix,

    GLM = Results_GLM,

    RF = Results_RF,

    XGB = Results_XGB,

    Table4 = Table4

  ),

  file =
    "E:/my File/Publikasi Artikel/Education and Information Technologies
Q1/Baseline_Results_EIT.xlsx",

  overwrite = TRUE
)

##PART C - SMOTE ANALYSIS
#####
# SMOTE PACKAGES

```

```
#####

required_packages <- c(
  "themis",
  "recipes",
  "ROSE"
)

for(pkg in required_packages){
  if(!require(pkg,
    character.only = TRUE)){
    install.packages(pkg)
    library(pkg,
      character.only = TRUE)
  }
}

#####
# CLASS IMBALANCE
#####

table(Train$Class)

prop.table(
  table(Train$Class)
)

FS4 <- c(
  "theta",
  "lz",
  "anomaly_score",
  "mean_rt"
)

#####
# TRAIN DATA FOR SMOTE
#####

Train_FS4 <- Train[, c(
  FS4,
  "Class"
)]

#####
# SMOTE
#####

set.seed(2026)

Recipe_SMOTE <- recipe(
  Class ~ .,

```

```

data = Train_FS4
) |>

step_smote(
  Class,
  over_ratio = 1
)

SMOTE_Data <- prep(
  Recipe_SMOTE
) |>

bake(
  new_data = NULL
)

#####
# AFTER SMOTE
#####

table(
  SMOTE_Data$Class
)

prop.table(
  table(
    SMOTE_Data$Class
  )
)

#####
# GLM + SMOTE
#####

GLM_SMOTE <- glm(

  Class ~ theta +
    lz +
    anomaly_score +
    mean_rt,

  data = SMOTE_Data,

  family = binomial
)

#####
# GLM PREDICTION
#####

P_GLM_SMOTE <- predict(

  GLM_SMOTE,

  Test,

```

```

    type = "response"
  )

#####
# GLM RESULTS
#####

Result_GLM_SMOTE <-

  Evaluate_Model(
    P_GLM_SMOTE,
    y_test
  )

Result_GLM_SMOTE

#####
# RF + SMOTE
#####

RF_SMOTE <- randomForest(

  Class ~ theta +
    lz +
    anomaly_score +
    mean_rt,

  data = SMOTE_Data,

  ntree = 1000,

  importance = TRUE
)

#####
# RF PREDICTION
#####

P_RF_SMOTE <- as.numeric(

  predict(
    RF_SMOTE,
    Test,
    type = "prob"
  )[, "Cheater"]

)

#####
# RF RESULTS
#####

Result_RF_SMOTE <-

```

```

Evaluate_Model(
  P_RF_SMOTE,
  y_test
)

Result_RF_SMOTE

#####
# XGB + SMOTE
#####

X_train_smote <- as.matrix(
  SMOTE_Data[,FS4]
)

y_train_smote <- ifelse(
  SMOTE_Data$Class ==
    "Cheater",

  1,
  0
)

dtrain_smote <- xgb.DMatrix(
  data = X_train_smote,
  label = y_train_smote
)

params <- list(
  objective =
    "binary:logistic",

  eval_metric =
    "auc",

  max_depth = 3,

  learning_rate = 0.05,

  subsample = 0.80,

  colsample_bytree = 0.80,

  min_child_weight = 5
)

XGB_SMOTE <- xgb.train(
  params = params,

```

```

data = dtrain_smote,

nrounds = 300
)

#####
# XGB PREDICTION
#####

dtest <- xgb.DMatrix(

  as.matrix(
    Test[,FS4]
  )
)

P_XGB_SMOTE <- predict(

  XGB_SMOTE,

  dtest
)

#####
# XGB RESULTS
#####

Result_XGB_SMOTE <-

  Evaluate_Model(
    P_XGB_SMOTE,
    y_test
  )

Result_XGB_SMOTE

#####
# TABLE 5
#####

#####
# TABLE 5
#####

Baseline_SMOTE <- data.frame(

  Model = c(
    "GLM_FS4_Baseline",
    "RF_FS4_Baseline",
    "XGB_FS4_Baseline",
    "GLM_FS4_SMOTE",
    "RF_FS4_SMOTE",
    "XGB_FS4_SMOTE"
  )
)

```

```
),  
ROC_AUC = c(  
  Results_GLM$ROC_AUC[  
    Results_GLM$Model=="GLM_FS4"  
  ],  
  Results_RF$ROC_AUC[  
    Results_RF$Model=="RF_FS4"  
  ],  
  Results_XGB$ROC_AUC[  
    Results_XGB$Model=="XGB_FS4"  
  ],  
  Result_GLM_SMOTE$ROC_AUC,  
  Result_RF_SMOTE$ROC_AUC,  
  Result_XGB_SMOTE$ROC_AUC  
)
```

```
PRAUC = c(  
  Results_GLM$PRAUC[  
    Results_GLM$Model=="GLM_FS4"  
  ],  
  Results_RF$PRAUC[  
    Results_RF$Model=="RF_FS4"  
  ],  
  Results_XGB$PRAUC[  
    Results_XGB$Model=="XGB_FS4"  
  ],  
  Result_GLM_SMOTE$PRAUC,  
  Result_RF_SMOTE$PRAUC,  
  Result_XGB_SMOTE$PRAUC  
)
```

```
Precision = c(  
  Results_GLM$Precision[  
    Results_GLM$Model=="GLM_FS4"  
  ],  
  Results_RF$Precision[  
    Results_RF$Model=="RF_FS4"  
  ],  
  Results_XGB$Precision[
```

```

    Results_XGB$Model=="XGB_FS4"
  ],
  Result_GLM_SMOTE$Precision,
  Result_RF_SMOTE$Precision,
  Result_XGB_SMOTE$Precision
),
Recall = c(
  Results_GLM$Recall[
    Results_GLM$Model=="GLM_FS4"
  ],
  Results_RF$Recall[
    Results_RF$Model=="RF_FS4"
  ],
  Results_XGB$Recall[
    Results_XGB$Model=="XGB_FS4"
  ],
  Result_GLM_SMOTE$Recall,
  Result_RF_SMOTE$Recall,
  Result_XGB_SMOTE$Recall
),
F1 = c(
  Results_GLM$F1[
    Results_GLM$Model=="GLM_FS4"
  ],
  Results_RF$F1[
    Results_RF$Model=="RF_FS4"
  ],
  Results_XGB$F1[
    Results_XGB$Model=="XGB_FS4"
  ],
  Result_GLM_SMOTE$F1,
  Result_RF_SMOTE$F1,
  Result_XGB_SMOTE$F1
),
MCC = c(
  Results_GLM$MCC[

```

```

    Results_GLM$Model=="GLM_FS4"
  ],
  Results_RF$MCC[
    Results_RF$Model=="RF_FS4"
  ],
  Results_XGB$MCC[
    Results_XGB$Model=="XGB_FS4"
  ],
  Result_GLM_SMOTE$MCC,
  Result_RF_SMOTE$MCC,
  Result_XGB_SMOTE$MCC
),
BACC = c(
  Results_GLM$BACC[
    Results_GLM$Model=="GLM_FS4"
  ],
  Results_RF$BACC[
    Results_RF$Model=="RF_FS4"
  ],
  Results_XGB$BACC[
    Results_XGB$Model=="XGB_FS4"
  ],
  Result_GLM_SMOTE$BACC,
  Result_RF_SMOTE$BACC,
  Result_XGB_SMOTE$BACC
)
)

Baseline_SMOTE

## #####
# EXPLAINABLE AI
#####

required_packages <- c(
  "vip",
  "iml",
  "fastshap",
  "shapviz",
  "ggplot2"
)

```

```

for(pkg in required_packages){
  if(!require(pkg,
              character.only = TRUE)){
    install.packages(pkg)
    library(pkg,
              character.only = TRUE)
  }
}

#####
# RF IMPORTANCE
#####

RF_Imp <- importance(
  RF_FS4
)

RF_Imp

#####
# FIGURE 5
#####
#####
# TABLE 6
#####

RF_Table <- data.frame(
  Feature = rownames(RF_Imp),
  MeanDecreaseAccuracy =
    RF_Imp[, "MeanDecreaseAccuracy"],
  MeanDecreaseGini =
    RF_Imp[, "MeanDecreaseGini"]
)

RF_Table

varImpPlot(
  RF_FS4,
  main =
    "Random Forest Variable Importance"
)

#####
# TABLE 6
#####

RF_Table <- data.frame(

```

```

Feature = rownames(RF_Imp),

MeanDecreaseAccuracy =
  RF_Imp[,1],

MeanDecreaseGini =
  RF_Imp[,2]
)

RF_Table <- RF_Table[
  order(
    -RF_Table$MeanDecreaseGini
  ),
]

RF_Table

#####
# XGB IMPORTANCE
#####

XGB_Importance <- xgb.importance(
  feature_names = FS4,
  model = XGB_FS4
)

XGB_Importance

#####
# FIGURE 6
#####

xgb.plot.importance(
  XGB_Importance
)

#####
# SHAP VALUES
#####

X_test <- as.matrix(
  Test[,FS4]
)

SHAP <- shapviz(
  XGB_FS4,
  X_pred = X_test,
  X = Test[,FS4]
)

```

```

)

#####
# FIGURE 7
#####

sv_importance(
  SHAP
)

#####
# FIGURE 8
#####

sv_importance(
  SHAP,
  kind = "beeswarm"
)

sv_dependence(
  SHAP,
  "lz"
)

sv_dependence(
  SHAP,
  "anomaly_score"
)

sv_dependence(
  SHAP,
  "theta"
)

sv_dependence(
  SHAP,
  "mean_rt"
)

#####
# TABLE 7
#####

Feature_Ranking <- data.frame(
  Feature =
    XGB_Importance$Feature,

  Gain =
    XGB_Importance$Gain,

  Cover =
    XGB_Importance$Cover,

```

Frequency =  
XGB\_Importance\$Frequency

)

Feature\_Ranking
